# Supplementary material for: Effects of chess-based cognitive remediation training as therapy add-on in alcohol and tobacco use disorders: protocol of a randomised, controlled clinical fMRI trial
Source: PubMed Central journal article supplement — BMJ Open. 2022 Sep 6;12(9):e057707. doi: 10.1136/bmjopen-2021-057707 (PMC9454048; doi:10.1136/bmjopen-2021-057707), 2022-09-06
Supplement: bmjopen-2021-057707.draft_revisions.pdf [file bmjopen-2021-057707.draft_revisions.pdf]

# BMJ Open

BMJ Open is committed to open peer review. As part of this commitment we make the peer review history of every article we publish publicly available.

When an article is published we post the peer reviewers' comments and the authors' responses online. We also post the versions of the paper that were used during peer review. These are the versions that the peer review comments apply to.

The versions of the paper that follow are the versions that were submitted during the peer review process. They are not the versions of record or the final published versions. They should not be cited or distributed as the published version of this manuscript.

BMJ Open is an open access journal and the full, final, typeset and author-corrected version of record of the manuscript is available on our site with no access controls, subscription charges or pay-per-view fees (<http://bmjopen.bmj.com>).

If you have any questions on BMJ Open's open peer review process please email [info.bmjopen@bmj.com](mailto:info.bmjopen@bmj.com)

# BMJ Open

## Chess-based cognitive remediation training as therapy add-on in alcohol and tobacco use disorders: protocol of a randomized, controlled study

|                               |                                                                                                                                                                                                                                                                                                                                                                                                                                                                                                                                                                                                                                                                                                                                                                                                                                                                                                                                                                                                                                                                   |
|-------------------------------|-------------------------------------------------------------------------------------------------------------------------------------------------------------------------------------------------------------------------------------------------------------------------------------------------------------------------------------------------------------------------------------------------------------------------------------------------------------------------------------------------------------------------------------------------------------------------------------------------------------------------------------------------------------------------------------------------------------------------------------------------------------------------------------------------------------------------------------------------------------------------------------------------------------------------------------------------------------------------------------------------------------------------------------------------------------------|
| Journal:                      | <i>BMJ Open</i>                                                                                                                                                                                                                                                                                                                                                                                                                                                                                                                                                                                                                                                                                                                                                                                                                                                                                                                                                                                                                                                   |
| Manuscript ID                 | bmjopen-2021-057707                                                                                                                                                                                                                                                                                                                                                                                                                                                                                                                                                                                                                                                                                                                                                                                                                                                                                                                                                                                                                                               |
| Article Type:                 | Protocol                                                                                                                                                                                                                                                                                                                                                                                                                                                                                                                                                                                                                                                                                                                                                                                                                                                                                                                                                                                                                                                          |
| Date Submitted by the Author: | 28-Sep-2021                                                                                                                                                                                                                                                                                                                                                                                                                                                                                                                                                                                                                                                                                                                                                                                                                                                                                                                                                                                                                                                       |
| Complete List of Authors:     | Gerhardt, Sarah; Central Institute of Mental Health, Department of Addictive Behavior and Addiction Medicine<br>Lex, Gereon; Central Institute of Mental Health, Department of Addictive Behavior and Addiction Medicine<br>Holzammer, Jennifer; Central Institute of Mental Health, Department of Addictive Behavior and Addiction Medicine<br>Karl, Damian; Central Institute of Mental Health, Department of Addictive Behavior and Addiction Medicine<br>Wieland, Alfred; Central Institute of Mental Health, Institute of Cognitive and Clinical Neuroscience<br>Schmitt, Roland; Central Institute of Mental Health, Department of Addictive Behavior and Addiction Medicine<br>Recuero, Ainoa Jiménez; Club de Ajedrez Magic de Extremadura, Mérida<br>Montero, Juan Antonio; Club de Ajedrez Magic de Extremadura, Mérida<br>Weber, Tillmann; Median Klinik Wilhelmsheim<br>Vollstädt-Klein, Sabine; Central Institute of Mental Health, Department of Addictive Behaviour and Addiction Medicine; Mannheim Center for Translational Neurosciences (MCTN) |
| Keywords:                     | Substance misuse < PSYCHIATRY, Adult psychiatry < PSYCHIATRY, Magnetic resonance imaging < RADIOLOGY & IMAGING                                                                                                                                                                                                                                                                                                                                                                                                                                                                                                                                                                                                                                                                                                                                                                                                                                                                                                                                                    |
|                               |                                                                                                                                                                                                                                                                                                                                                                                                                                                                                                                                                                                                                                                                                                                                                                                                                                                                                                                                                                                                                                                                   |

SCHOLARONE™  
Manuscripts

1  
2  
3 **Chess-based cognitive remediation training as therapy add-on in alcohol and tobacco use**  
4 **disorders: protocol of a randomized, controlled study**  
5

6  
7 *Sarah Gerhardt<sup>1\*</sup>, Gereon Lex<sup>1\*</sup>, Jennifer Holzammer<sup>1</sup>, Damian Karl<sup>1</sup>, Alfred Wieland<sup>2</sup>, Roland*  
8 *Schmitt<sup>1</sup>, Ainoa Jiménez Recuero<sup>3</sup>, Juan Antonio Montero<sup>3</sup>, Tillmann Weber<sup>4</sup>, Sabine Vollstädt-*  
9 *Klein<sup>1,5</sup> #*  
10

11  
12 <sup>1</sup> Department of Addictive Behavior and Addiction Medicine, Central Institute of Mental Health,  
13 Medical Faculty Mannheim, Heidelberg University, Mannheim, Germany.  
14

15  
16 <sup>2</sup> Institute of Cognitive and Clinical Neuroscience, Central Institute of Mental Health, Medical Faculty  
17 Mannheim, Heidelberg University, Mannheim, Germany.  
18

19  
20 <sup>3</sup> Club de Ajedrez Magic de Extremadura, Mérida, Badajoz, Spain.  
21

22  
23 <sup>4</sup> MEDIAN Kliniken Wilhelmsheim, Oppenweiler, Germany.  
24

25  
26 <sup>5</sup> Mannheim Center for Translational Neurosciences (MCTN), Medical Faculty Mannheim, Heidelberg  
27 University, Mannheim, Germany.  
28

29  
30 \* Both authors contributed equally to this work.  
31

32  
33 # Corresponding Author  
34

35 Sabine Vollstädt-Klein, Department of Addictive Behavior and Addiction Medicine, Central Institute of  
36 Mental Health, Mannheim, Medical Faculty Mannheim, University of Heidelberg, Germany, PO Box  
37 12 21 20, D-68072 Mannheim, Germany. Tel.: 0621 1703-3912, Fax: 0621 1703-3505, E-mail:  
38 S.Vollstaedt-Klein@zi-mannheim.de  
39  
40  
41  
42  
43  
44  
45  
46  
47  
48  
49  
50  
51  
52  
53  
54  
55  
56  
57  
58  
59  
60

## Abstract

### *Introduction*

Alcohol and tobacco use disorders (AUD, TUD) are frequent, both worldwide and in the German population. While cognitive dysfunctions might also be a predisposing factor for the development and maintenance of AUD and TUD, these disorders also lead to cognitive impairments facilitating instances of relapse. Cognitive training has been proposed as an intervention for enhancing cognitive functioning and improving treatment outcome. However, possible cognitive enhancement effects and underlying neural mechanisms of these cognitive interventions are not yet fully understood. Examining the effect of chess-based cognitive remediation training (CB-CRT) on treatment outcomes, such as abstinence or reduced substance consumption, will provide insights into mechanisms underlying relapse and abstinence, including potential risk factors. If CB-CRT as a therapy add-on proves to be more effective than standard treatment alone, this intervention might help to improve health behaviour in affected individuals.

### *Methods*

This study evaluates CB-CRT as a therapy add-on for individuals with AUD and TUD. N=96 individuals with either AUD (N=48) or TUD (N=48) between the ages of 18 and 65 years will be randomized to four treatment groups. Two control groups with 24 AUD and 24 TUD individuals will receive treatment as usual, i.e., AUD treatment in a clinic, TUD outpatient treatment. Two therapy add-on groups with 24 AUD and 24 TUD individuals will receive a 6-week CB-CRT as a therapy add-on to their treatment as usual. Several neurocognitive tests as well as functional magnetic resonance imaging (fMRI) tasks will be administered before and after the 6-week period of CB-CRT or corresponding time frame with regards to the control group. All individuals will be followed up on monthly for three months. Endpoints of this study include relapse and substance intake but also effects of group and time regarding neural activation during fMRI tasks, as well as performance on several neurocognitive tests.

### *Trial registration*

The study was registered in the Clinical Trials Register (trial identifier: NCT04057534) on December 8th, 2019.

### Strengths and Limitations of this study

- The evaluation of the efficacy of CB-CRT as a supportive therapy add-on for SUD might lead to cost-efficient positive treatment outcomes.
- The use of objective measures to examine underlying neurobiopsychological mechanisms expands the current research on risk factors for relapse.
- The inclusion of two substances (alcohol and tobacco) increases the generalizability of the findings.
- The 6-week long therapy add-on might lead to drop-outs due to the large amount of time participants have to commit to the program.

For peer review only

## Introduction

Substance use, including alcohol and tobacco use, is widespread both worldwide and in the German population. Worldwide, the prevalence for heavy episodic drinking of alcohol was estimated at 18.4% for adults, while daily smoking was estimated at 15.2%[1]. In 2018 in Germany, the prevalence of hazardous consumption of alcohol was estimated at 19.1%, and the 12-month prevalence for alcohol use disorder (AUD) at 5.9%. The prevalence of daily consumption of tobacco was estimated at 15.1%, and the 12-month prevalence for tobacco use disorder (TUD) at 8.6%[2]. In Germany, follow-up costs of alcohol use are estimated at 21 billion euros[3] and for tobacco use at 24 billion euros[4]. Furthermore, negative effects on health and on mortality rates are associated with TUD[5].

For individuals with AUD having undergone treatment, relapse rates between 22 and 86% have been observed during short-term follow-ups (16 weeks) up to a long-term follow-up of 16 years[6-8]. Following treatment, the relapse rate for TUD after one year is estimated to be between 2 and 17%[9]. A relapse can be brought on by heightened stress sensitivity, depressive mood, increased anxiety, or confrontation with a substance-related stimulus[10-12].

Even though some studies postulate intact, goal-directed behaviour in individuals with SUD [13-15], others observed neurobiological impairments in brain areas involved in inhibitory control in individuals with SUD[16-19]. In a model proposed by Bechara, SUD is viewed as an imbalance between two distinct, but closely interacting neural systems[20], which are essential for decision-making: The impulsive system is involved in the prediction and valuation of immediate rewards and includes such regions as the amygdala and the striatum. The reflective system signals long-term consequences of actions and involves the ventromedial prefrontal cortex (VMPFC), the dorsolateral prefrontal cortex (DLPFC), the anterior cingulate, the insula, and the hippocampus. In SUD, it is assumed that the impulsive system becomes overactive, preventing the reflective system from exerting executive cognitive control over substance use. It might be those immediate rewards, such as pleasant effects derived from alcohol or nicotine consumption, are overvalued, and give preference over future rewards, such as health benefits associated with abstinence. Individuals with SUD also demonstrate a preference for smaller, immediate monetary rewards over larger, delayed ones[21]. Furthermore, the imbalance between impulsive and reflective systems reveals itself in dysfunctional inhibitory control, leading to increased risk taking[20]. Beyond these

1  
2  
3 impairments, individuals with SUD also demonstrate reduced cognitive functioning in the  
4 domains of problem solving, mental flexibility, forming judgments, and working memory[22].  
5 A study using functional magnetic resonance imaging (fMRI)[23] found less activation in the  
6 right frontal cortex during a response inhibition task was associated with more cigarettes  
7 smoked in participants wanting to quit smoking. Other studies using fMRI have revealed a shift  
8 of neural activation from the ventral (nucleus accumbens) to the dorsal striatum (putamen  
9 and nucleus caudate), which was suggested to reflect a decrease in cortical control when  
10 viewing substance related cues [24]. Being related to executive functions, metacognitive  
11 abilities and beliefs play a major role in addiction[25]. In general, metacognition refers to the  
12 ability to know about cognition in general but, more importantly, to be aware of and know  
13 about one's own cognition[26]. Prefrontal regions, as well as the precuneus or dorsal anterior  
14 cingulate cortex seem to play an important role[27]. Generic and dysfunctional metacognitive  
15 beliefs, but also metacognitive beliefs about addiction-related thoughts or craving can predict  
16 the severity of addictive behaviour, craving, and relapse[25].

17  
18 „Cognitive remediation“ (Cognitive remediation therapy (CRT)) is a psychotherapeutic  
19 approach to improve cognitive deficits[28]. Cognitive training exercises span functional  
20 domains from executive functioning (inhibition, decision-making, cognitive flexibility, and  
21 working memory) to attention. Through repeated training, CRT can systematically stimulate  
22 and strengthen cognitive processes. A primary therapeutic objective is to improve the efficacy  
23 of other psychotherapeutic interventions, which require a minimal level of cognitive skill[29].  
24 For example, it has been demonstrated that executive functioning skills can influence the  
25 efficacy of cognitive behavioural therapy[30]. CRT, specifically, has already been  
26 demonstrated to be successful as an add-on therapy in treating schizophrenia and eating  
27 disorders[31]. However, it has been suggested to explicitly teach metacognitive abilities in  
28 order to improve the outcome of CRT[32], since this might be a significant mechanism  
29 contributing to the effects of CRT in patients with schizophrenia[33]. Indeed, recent  
30 observations indicate a beneficial effect of CRT on metacognitive abilities, e.g., in  
31 schizophrenia[34]. As an add-on therapy to treat substance use disorders CRT seems equally  
32 promising[35]. However, there is a lack of studies examining the efficacy of CRT as a modulator  
33 of cognition to improve treatment outcomes[36]. A review on AUD[37] discussed that CRT  
34 improves split attention, recognition of warning signals, working memory, as well as episodic  
35 memory. Most relevantly, an improvement in working memory and inhibitory control was able  
36  
37  
38  
39  
40  
41  
42  
43  
44  
45  
46  
47  
48  
49  
50  
51  
52  
53  
54  
55  
56  
57  
58  
59  
60

1  
2  
3 to exert a positive influence on substance use patterns[37]. Additionally, including  
4 metacognitive trainings when treating individuals with SUD might be advantageous[25, 38].  
5  
6 Finally, promising studies have demonstrated a potential beneficial effect of classical chess  
7 training on the treatment of attention deficit hyperactivity disorder (ADHD) and schizophrenia  
8 as an add-on therapy. In the case of ADHD, classical chess training was able to effectively  
9 reduce disease severity[39]. A further study in patients with ADHD showed an improvement  
10 in the ability to concentrate[40]. Negative symptoms common to patients suffering from  
11 schizophrenia include a wide variety of cognitive deficits, including impaired attention-,  
12 memory-, learning- and problem-solving skills[41]. Chess training was able to rescue some of  
13 these deficits experienced by schizophrenic patients, improving voluntary processing,  
14 inhibitory capacity and planning proficiencies[42]. Examining the effects of chess training on  
15 mathematical problem-solving and metacognitive abilities in school children, no significant  
16 effects were observed compared to an active control group playing checkers and a passive  
17 control group[43].

18  
19 Besides the known effects of CRT on metacognition, the beneficial effect of chess-based CRT  
20 still remains unclear. However, present findings suggest that chess-based CRT might be able  
21 to improve cognitive functioning in domains which can be improved by classical CRT, while  
22 simultaneously potentially improving specific domains modulated by chess-based  
23 interventions.

24  
25 Consequently, our study aims to assess the effects of chess-based CRT (CB-CRT) on treatment  
26 outcomes and different aspects of cognition in individuals with AUD and TUD. Further, we  
27 assess underlying neurobiological mechanisms of CB-CRT in AUD and TUD also in relation to  
28 treatment outcome.

## 29 30 31 32 33 34 35 36 37 38 39 40 41 42 43 44 45 46 47 48 **Method and Analyses**

49  
50 To investigate the effects of CB-CRT as a therapy add-on in alcohol and tobacco use disorders,  
51 N = 96 individuals will be examined. N = 48 AUD participants undergoing a qualified therapy  
52 or rehabilitation treatment for alcohol use disorder and N = 48 TUD participants who  
53 participate in a qualified smoking cessation group therapy will be included in the study. The  
54 Consolidated Standards Reporting Trials (CONSORT) statement was used for developing the  
55 study framework. Individuals with a diagnosis of AUD will be recruited from the out-patient  
56  
57  
58  
59  
60



1  
2  
3 and in-patient clinics of the Department of Addictive Behaviour and Addiction Medicine at the  
4 Central Institute of Mental Health and from the residential addiction treatment center  
5 MEDIAN Klinik Wilhelmsheim, Germany. Individuals with TUD will be recruited using public  
6  
7 announcements including, flyers, and social media posts.  
8  
9

10 Half of each group (AUD, TUD) will be randomly assigned to either the control group or  
11 experimental group. Regarding the control groups, N = 24 AUD participants receive an in-  
12 patient qualified detoxification treatment program, an in- or out-patient rehabilitation  
13 program, or semi-inpatient therapy in a day-clinic. N = 24 TUD participants receive qualified  
14 smoking cessation group therapy following study inclusion. The out-patient smoking cessation  
15 therapy lasts for 6 weeks with one group therapy session à 1.5 hours per week. Individuals  
16 randomly allocated to the experimental group (24 individuals with AUD and 24 individuals  
17 with TUD) will receive CB-CRT for 1.5 hours twice a week for 6 weeks in addition to the  
18 standard treatment.  
19  
20  
21  
22  
23  
24  
25  
26  
27  
28

### 29 ***Examination procedure***

30 Eligible participants between 18 and 65 years will be informed about the purpose and all  
31 aspects of the study. They will be provided with written study information according to the  
32 ethics regulations. Participants will be able to ask questions regarding the study. Afterwards,  
33 written informed consent will be obtained. All participants can withdraw their consent at any  
34 time. Then, study exclusion- and inclusion criteria will be examined. To do so, a structured  
35 clinical interview (SCID-5-CV)[44] will be performed to assess a possible history of lifetime and  
36 current mental disorders. Individuals with a diagnosis of severe mental or personality  
37 disorders will be excluded, e.g., lifetime bipolar disorder or schizophrenia or current severe  
38 depression, post-traumatic stress disorder. Current mild or moderate mental or personality  
39 disorders, such as mild anxiety-, adaptation, personality disorders or depression, will be  
40 tolerated. Individuals with AUD are included in the study after controlled abstinence for at  
41 least 72 hours, including completion of medically supervised detoxification (treatment of  
42 withdrawal symptoms with short-acting benzodiazepines or chlormethiazole must have been  
43 completed for at least three days). Individuals with TUD will be included following the  
44 intention to quit smoking. A detailed list of all inclusion and exclusion criteria regarding AUD  
45 and TUD are shown in table 1). Following study inclusion, participants will be randomly  
46 assigned to either the control or experimental group.  
47  
48  
49  
50  
51  
52  
53  
54  
55  
56  
57  
58  
59  
60

1  
2  
3 At the baseline examination appointment (T1) all participants will provide sociodemographic  
4 information and perform several neuropsychological tasks. An fMRI assessment will then take  
5 place. Participants will also fill out several questionnaires directly after the baseline  
6 assessment. After the 6 week long intervention period - either standard treatment alone or  
7 with CB-CRT as therapy add-on - a second examination appointment (T2) takes place. All  
8 participants will perform the same neuropsychological tasks again and the same fMRI  
9 assessment as conducted in T1 will take place. Participants will also fill out the same  
10 questionnaires as for T1. During a follow-up period of 12 weeks following the intervention,  
11 three telephone interviews (FU1, FU2, T3) will be conducted once a month. Instances of  
12 relapse and amount of tobacco or alcohol consumption will be documented. Beyond this, the  
13 same questionnaires as for T1 and T2 will be completed.

14  
15 Please see figure 1 for a detailed description of the study procedure and table 2 for list of  
16 assessments used, including fMRI and neuropsychological paradigms, and questionnaires.

### 27 28 29 ***Standard Treatment***

30 All study participants (TUD and AUD) will follow their respective treatment as usual (TAU).  
31 With regards to TUD, a qualified smoking cessation group therapy with one therapy session  
32 per week (90 minutes) will be held by a trained and certified psychologist. This intervention is  
33 strongly recommended in the latest version of the S3 guidelines for tobacco use disorder[45].  
34 A superior effect on smoking cessation was observed following group therapy compared to,  
35 e.g., self-help or less intense interventions[46]. During the qualified smoking cessation group  
36 therapy, interventions following a cognitive-behavioural psychotherapy approach will be  
37 applied[47]. Study participants with AUD will follow the respective in-house or day-clinic  
38 therapeutic programme, as recommended by the respective S3 guidelines for alcohol use  
39 disorder[48]. This standard treatment includes medical and psychological interventions.

### 49 50 51 ***Chess-based cognitive remediation training***

52 The planned CB-CRT „Entrenamiento cognitivo a través del ajedrez (ECAM, „Cognitive training  
53 through chess“, <https://ajedrezmagic.es/el-entrenamiento-cognitivo-a-traves-del-ajedrez/>)  
54 consists of a battery of tasks and was developed by one of the co-authors (J. A. M.). The  
55 training battery, which is administered in a group setting using mainly a chess demonstration  
56 board, is designed to strengthen cognitive functioning in specific domains such as selective  
57  
58  
59  
60

1  
2  
3 attention (figure 2a), short-term memory (figure 2b), focal attention, pattern recognition,  
4 visuospatial abilities, planification skills (figure 2c), and inhibition. Overall, metacognitive  
5 abilities are trained, e.g., by explicitly teaching different concepts of cognitive functioning,  
6 questioning, and identifying the underlying cognitive process, and enhancing the awareness  
7 of before mentioned aspects. Participants perform most of the specific tasks in front of the  
8 group and, for a social reinforcement effect, everyone will applaud the respective participant.  
9 Some of the tasks are conducted via paper-pencil. The training battery has been utilized for  
10 more than ten years by J.A.M and his colleagues as an add-on therapy for elderly individuals,  
11 children with autism and/or ADHD, individuals with Down Syndrome, mental and other  
12 disorders, and in adults with SUD. The scientific evaluation of the program is one of the goals  
13 of the current study.

14  
15  
16  
17  
18  
19  
20  
21  
22  
23  
24 In an unpublished pilot study in the rehabilitation clinic at Comunidad Terapéutica La  
25 Garrovilla, N = 26 patients with SUD (N = 22 male; substances: alcohol, opiates, cocaine,  
26 benzodiazepines, cannabis) were examined. CB-CRT was applied in a group setting twice a  
27 week for a duration of 90 minutes each. Cognitive functioning, especially in executive  
28 functions, was assessed at admission to the clinic at Comunidad Terapéutica La Garrovilla,  
29 Badajoz (Extremadura, Spain) and again after 14 weeks. The neuropsychological testing  
30 battery included measures of general processing speed (trail-making test A), cognitive  
31 flexibility (trail-making test B)[49], planning abilities (Tower of London)[50] and intelligence  
32 (Wechsler Adult Intelligence Scale, WAIS). Significant increases in performance were found  
33 after 14 weeks of treatment in general processing speed (trail-making test A;  $p = .001$ ),  
34 cognitive flexibility (trail-making test B;  $p = .013$ ), the Tower of London test ( $p = .001$ ) as well  
35 as in the WAIS measures for verbal comprehension (“similarities”,  $p = .019$ ) and for working  
36 memory (“letter-number sequencing”,  $p = .030$ , “digit span forward”,  $p = .044$ , “digit span  
37 backward”,  $p = .018$ , “digit span total”,  $p = .007$ ). Performance in the WAIS measures “coding”  
38 (processing speed) and “matrix reasoning” (perceptual reasoning) did not differ significantly.  
39  
40 In another sample of N = 15 patients receiving the chess-based add-on treatment for 3.5  
41 months, subjective satisfaction was evaluated. On scales ranging from 1 (very unsatisfied /  
42 very poor) to 4 (very satisfied / very good), 73% of the patients rated the overall program as  
43 very good (i. e. score of 4). 67% of the patients found the program very helpful in treating their  
44 SUD (score of 4), 27% found it helpful (score of 3). Further, when asked how the program  
45 influenced other domains being negatively affected by SUD before admission, 53% found the  
46  
47  
48  
49  
50  
51  
52  
53  
54  
55  
56  
57  
58  
59  
60

1  
2  
3 program very supportive (score of 4), 27% found it supportive (score of 3). Besides this, 87%  
4 reported that the program helped them to increase their memory capabilities, 93% stated a  
5 subjective increase in attention performance, and 93% reported an enhancement in decision-  
6 making.  
7  
8  
9

### 10 ***Self-rating Questionnaires***

11  
12 A goal attainment scale[51] will be used to assess abstinence-related goals. Self-esteem will  
13 be measured with the Rosenberg scale[52]. Self-efficacy will be assessed with the General Self-  
14 Efficacy Scale (GSE)[53]. Perceived Social Support will be examined using the brief form of the  
15 Perceived Social Support Questionnaire (F-SozU)[54] and psychological well-being with the  
16 Habitual Subjective Well-Being Questionnaire (HSWBS)[55]. Life satisfaction will be measured  
17 with the Satisfaction with Life Scale (SWLS)[56]. Affect will be measured with the Positive and  
18 Negative Affect Schedule (PANAS)[57]. The symptoms of anxiety will be assessed with the  
19 State-Trait Anxiety Inventory[58] as a personality trait (STAI X2) and as a temporary state (STAI  
20 X1) whereas depressive symptoms will be measured with Beck Depression Inventory (BDI-  
21 II)[59, 60]. Perceived stress will be measured by the Perceived Stress Scale (PSS)[61].  
22 Impulsivity will be measured with the Barratt Impulsiveness Scale (BIS-15)[62, 63]. In addition  
23 to impulsivity, the presence of ADHD symptoms will be measured using the Adult ADHD Self-  
24 Report Scale-V1.1 Symptoms Checklist (ASRS-V1.1)[64] and the ADHD Self-Rating Scale  
25 (ADHD-SB)[65]. A self-report measure of habitual routines and automatic tendencies in  
26 everyday life will be done by the Creature of Habit Scale (COHS)[66]. Substance-related habits  
27 will be measured by the Self-Report Habit Index (SRHI)[67]. The intensity of physical addiction  
28 to nicotine will be assessed by Fagerström Test for Nicotine Dependence (FTND)[68]. As a brief  
29 screening test for measuring heavy drinking, active alcohol abuse as well as dependence, the  
30 Alcohol Use Disorder Identification Test (AUDIT)[69] will be applied. Alcohol-related  
31 withdrawal symptoms will be assessed by clinical institute withdrawal assessment for alcohol  
32 scale (CIWA-Ar)[70]. Alcohol or tobacco consumption and craving will be measured with the  
33 following self-report scales: Obsessive Compulsive Drinking Scale (OCDS-G)[71], Alcohol  
34 Craving Questionnaire (ACQ-SF-R)[72], Craving Automated Scale for Alcohol (CAS-A)[73],  
35 Alcohol Urge Questionnaire (AUQ)[74], Alcohol Dependence Scale (ADS)[75], Form90[76],  
36 Questionnaire on Smoking Urges (QSU)[77], Craving Automated Scale for Cigarette Smoking  
37 (CAS-CS)[78], Obsessive Compulsive Smoking Scale (OCSS)[79], Smoking Consequences  
38  
39  
40  
41  
42  
43  
44  
45  
46  
47  
48  
49  
50  
51  
52  
53  
54  
55  
56  
57  
58  
59  
60

1  
2  
3 Questionnaire for Adults (SCQ-A)[80], Wisconsin Smoking Withdrawal Scale (WSWS)[81] and  
4 Visual Analog Craving Scales (VACS)[82].  
5  
6  
7

### 8 ***Neuropsychological assessments***

9  
10 Tasks investigating components of working memory (Wechsler Memory Scale-3)[83],  
11 decision-making (Iowa Gambling Task)[84], as well as mental flexibility (Dimensional Change  
12 Card Sort)[85] and attentional capacity (d2-R Test of Attention)[86] will be administered.  
13  
14  
15  
16

### 17 ***fMRI assessments***

18  
19 During the fMRI scanner examination, study participants will perform a stop-signal task[87],  
20 alcohol- and tobacco based cue-reactivity tasks[78, 88], an N-back task[89] and a resting-state  
21 MRI. Scanning will be performed with a 3T whole-body tomograph (MAGNETOM Prisma;  
22 Siemens, Erlangen, Germany). T2\* weighted multi-band echo-planar images (mb-EPI) using a  
23 multi-band acceleration factor 6 will be acquired in a transversal orientation 20° clockwise to  
24 AC-PC-line covering the whole brain (TR = 869 ms, TE = 38 ms, 60 slices, slice thickness = 2.4  
25 mm, voxel size 2.4 × 2.4 × 2.4 mm, no inter-slice gap, field of view (FoV) = 210 mm, matrix size  
26 88 x 88, acquisition orientation T > C, interleaved slice order, acceleration factor slice = 6, flip  
27 angle = 58°, bandwidth = 1832 Hz/Px, prescan normalize, weak raw data filter, LeakBlock  
28 kernel, fat sat). This short TE and the 20° flip to AC-PC orientation is chosen to minimize  
29 susceptibility artefacts. Scanner sequences are provided by the Center for Magnetic  
30 Resonance Research (CMRR), University of Minnesota, Minneapolis, MN, USA  
31 (<https://www.cmrr.umn.edu/multiband/>)[90]. In addition, a T1-weighted 3D MPRAGE  
32 (Magnetization Prepared - Rapid Gradient Echo) dataset consisting of 208 sagittal slices (slice  
33 thickness 1 mm, 1×1×1 mm voxel size, FOV 256 x 256 mm<sup>2</sup>, TR= 2000ms, TE = 2.01 ms, TI =  
34 800 ms, flip angle = 8°) will be acquired.  
35  
36  
37  
38  
39  
40  
41  
42  
43  
44  
45  
46  
47  
48  
49

### 50 ***Endpoints***

51  
52 Outcome measurements are the duration until the first severe relapse during the follow-up  
53 periods and amount of substance consumption in case of a relapse. Additional endpoints are  
54 changes in neural alcohol and tobacco cue-reactivity[78, 88], neural correlates of inhibition  
55 (stop-signal task)[91] and working memory (N-back task)[89], as well as functional  
56 connectivity within the salience network (SN) and executive control network (ECN) using  
57  
58  
59  
60

1  
2  
3 resting-state fMRI data. Also, working memory capacity (letter-number sequencing task of the  
4 Wechsler Memory Scale-3)[83], impulsivity (Barratt Impulsiveness Scale-15)[62, 63], mental  
5 flexibility (Dimensional Change Card Sort)[85], decision-making (Iowa Gambling Task)[84, 92]  
6 and attentional capacity (d2-R Test of Attention)[93] are endpoints of interest.  
7  
8  
9

### 10 11 12 **Sample size calculation**

13  
14 Using the software package G\*Power[94] sample size was estimated assuming an effect size  
15 of  $f = 0.2$  (ANOVA with repeated measures, within- and between subject factors and  
16 interactions). In this case, ideal sample coverage would be 24 individuals per group (at 80%  
17 power, alpha-level 5%).  
18  
19  
20  
21  
22

### 23 **Data analysis plan**

24  
25 To analyse psychometric and neuropsychological data, SPSS (Statistics for Windows, Version  
26 22.0. IBM Corp., Armonk, NY) will be used. The various dependent variables will be evaluated  
27 using multivariate analyses of variance with repeated measures. In addition, linear regression  
28 models will be calculated to examine the influence of confounding variables (for example,  
29 severity of tobacco or alcohol dependence) on the observed change in dependent variables.  
30 Cox-regression analyses will be conducted to examine the association with relapse. To analyse  
31 the fMRI data, SPM12 (Wellcome Department of Cognitive Neurology, London, UK) running  
32 under Matlab will be used. The pre-processing pipeline will include motion correction,  
33 normalization to the Montreal Neurological Institute (MNI) template, and a spatial smoothing  
34 with Gaussian kernel of 8 mm full width at half maximum (FWHM) will be conducted. The pre-  
35 processed data will then be used for first- and second-level analyses. On the first level (within-  
36 subject), neural activation associated with task conditions (contrasts) will be modelled via a  
37 convolution with a canonical hemodynamic response function (HFR) following a general linear  
38 model (GLM). A high-pass filter to remove low-frequency components of fMRI time-series will  
39 be used. Depending on the fMRI tasks, specific contrasts regarding task conditions will be  
40 modeled as described in the above cited literature. On the second level (between-subject) and  
41 regarding the effects of group and time, paired t-tests (e.g., pre vs. post intervention within  
42 one group) and full factorial models will be used. Additionally, regression models including  
43 clinical variables, such as severity of TUD or AUD, will be calculated. To control for multiple  
44 statistical testing the probability of a family wise error (FWE) will be set to .05.  
45  
46  
47  
48  
49  
50  
51  
52  
53  
54  
55  
56  
57  
58  
59  
60

## **Hypotheses**

### *Primary hypotheses*

1. CB-CRT improves cognitive functioning in AUD/TUD individuals in comparison to standard treatment alone.
2. CB-CRT improves psychosocial functioning (e.g., HSWBS, SWLS) in AUD/TUD individuals in comparison to standard treatment alone.
3. CB-CRT improves neuronal aberrations present when executing cognitive tasks in individuals with AUD/TUD in comparison to standard treatment alone.
4. CB-CRT influences the treatment process, e.g., time to first severe relapse, for AUD/TUD individuals positively in comparison to standard treatment alone.
5. CB-CRT decreases functional connectivity within the salience network in individuals with AUD/TUD in comparison to standard treatment alone.
6. CB-CRT decreases functional connectivity within the executive control network in individuals with AUD/TUD in comparison to standard treatment alone.

### *Secondary hypotheses*

1. CB-CRT might be more efficacious in individuals with impaired cognitive functioning, low self-esteem, self-efficacy, and social support.
2. Chess as a three-week add-on therapy influences the treatment process, e.g., time to first severe relapse for AUD/TUD individuals moderated and mediated by cognitive, affective, and psychosocial factors.

## **Ethics and dissemination**

The study was approved by the local Ethics Committee of the Medical Faculty Mannheim at the University of Heidelberg, Germany (reference number 2017-647N-MA). Before study inclusion and after a detailed explanation of all procedures, all participants will provide written informed consent. The study was registered in the Clinical Trials Register (trial identifier: NCT04057534) on December 8th, 2019. The study results will be disseminated by peer-review publications and conference presentations. Open-access publication is planned for all peer-reviewed publications. All participants are offered to receive a print of the final, published version of peer-reviewed publications. For protection of personal rights, and due to the sensitivity of the clinical and neuroimaging data, data will not be made publicly available. Upon direct request by other researchers and in mutual agreements (e.g., regarding data



1  
2  
3 protection), anonymized data can be made available. Upon request, analysis procedures and  
4 codes will be shared with other researchers.  
5  
6  
7  
8  
9  
10  
11  
12  
13  
14  
15  
16  
17  
18  
19  
20  
21  
22  
23  
24  
25  
26  
27  
28  
29  
30  
31  
32  
33  
34  
35  
36  
37  
38  
39  
40  
41  
42  
43  
44  
45  
46  
47  
48  
49  
50  
51  
52  
53  
54  
55  
56  
57  
58  
59  
60

For peer review only



## Tables

Table 1: Inclusion and exclusion criteria of the overall study sample. Specific criteria for AUD and TUD are highlighted.

| Inclusion criteria                                                                                                                                                                                                           |                                                                                                                                                               | Exclusion criteria                                                                                                                                                                                                                                                                                                                                                                                                                                                                                                                                                                                 |                                                                                                                                                                                                                                                                                                                |
|------------------------------------------------------------------------------------------------------------------------------------------------------------------------------------------------------------------------------|---------------------------------------------------------------------------------------------------------------------------------------------------------------|----------------------------------------------------------------------------------------------------------------------------------------------------------------------------------------------------------------------------------------------------------------------------------------------------------------------------------------------------------------------------------------------------------------------------------------------------------------------------------------------------------------------------------------------------------------------------------------------------|----------------------------------------------------------------------------------------------------------------------------------------------------------------------------------------------------------------------------------------------------------------------------------------------------------------|
| <ul style="list-style-type: none"> <li>Age between 18 and 65 years</li> <li>Normal or corrected to normal vision</li> <li>Signed written informed consent</li> <li>Signed consent for data security</li> </ul>               |                                                                                                                                                               | <ul style="list-style-type: none"> <li>Pregnancy</li> <li>Positive alcohol test</li> <li>Common exclusion criteria for MRI (e.g., metal, claustrophobia, epilepsy, adiposity)</li> <li>Suicidality</li> <li>Severe cognitive impairments (e.g., dementia)</li> <li>Severe physical illness</li> <li>Neurological disorders, history of brain injury</li> <li>Therapy with methylphenidate within the last 8 weeks</li> <li>Other mental disorders, except for mild or moderate anxiety-, adaptation-, post-traumatic stress-, personality-, attention deficit / hyperactivity disorders</li> </ul> |                                                                                                                                                                                                                                                                                                                |
| AUD                                                                                                                                                                                                                          | TUD                                                                                                                                                           | AUD                                                                                                                                                                                                                                                                                                                                                                                                                                                                                                                                                                                                | TUD                                                                                                                                                                                                                                                                                                            |
| <ul style="list-style-type: none"> <li>AUD according to DSM-5 (more than 3 fulfilled criteria)</li> <li>Currently in therapy for AUD (in-patient or outpatient therapy)</li> <li>Abstinence from alcohol &gt; 72h</li> </ul> | <ul style="list-style-type: none"> <li>TUD according to DSM-5 (more than 3 fulfilled criteria)</li> <li>Participation in smoking cessation therapy</li> </ul> | <ul style="list-style-type: none"> <li>Other Axis I mental disorder except for mild, moderate or remitted depression, other substance use disorders if AUD is still the main diagnosis</li> <li>Severe withdrawal symptoms (CIWA-Ar &gt; 7; Sullivan et al. 1989)</li> <li>Psychotropic medication within the last 14 days except for antidepressants or soporific and intake of medication for treating withdrawal effects until 3 days prior to study participation</li> </ul>                                                                                                                   | <ul style="list-style-type: none"> <li>Other Axis I mental disorder except for mild or remitted depression, other mild substance use disorders (i.e., max. of 3 fulfilled DSM-5 criteria in the last 12 months)</li> <li>Psychotropic medication within the last 14 days except for antidepressants</li> </ul> |

**Note:** AUD = Alcohol use disorder; TUD = Tobacco use disorder; DSM = Diagnostic and Statistical Manual of Mental Disorders; MRI = Magnetic resonance imaging

Table 2: Schedule of measurement during study participation.

| Measurement time point                         | S        |          | T1       |          | T2       |          | FU1      |          | FU2      |          | T3       |          |
|------------------------------------------------|----------|----------|----------|----------|----------|----------|----------|----------|----------|----------|----------|----------|
| Baseline                                       | T        | A        | T        | A        | T        | A        | T        | A        | T        | A        | T        | A        |
| Demographic information                        | x        | x        | x        | x        |          |          |          |          |          |          |          |          |
| Current medication*                            | x        | x        | x        | x        | x        | x        |          |          |          |          | x        | x        |
| Current somatic or mental conditions*          | x        | x        | x        | x        | x        | x        |          |          |          |          | x        | x        |
| Structured Clinical Interview (SCID-5-CV)      |          |          | x        | x        |          |          |          |          |          |          |          |          |
| Smoking history                                |          |          | x        | x        |          |          |          |          |          |          |          |          |
| Current smoking behavior*                      |          |          |          |          | x        |          | x        |          | x        |          | x        | x        |
| Smoking Assessment Interview                   |          |          | x        |          | x        |          |          |          |          |          | x        |          |
| (Current) drinking behavior*                   |          | x        |          | x        |          | x        |          | x        |          | x        | x        | x        |
| CIWA-Ar                                        |          |          |          | x        |          | x        |          |          |          |          |          |          |
| Current drug use*                              | x        | x        |          |          |          |          |          |          |          |          | x        | x        |
| Urine pregnancy and drugs screening            |          |          | x        | x        | x        | x        |          |          |          |          |          |          |
| Breath alcohol test                            |          |          | x        | x        | x        | x        |          |          |          |          |          |          |
| Breath carbon monoxide test                    |          |          | x        |          | x        |          |          |          |          |          |          |          |
| Goal attainment scaling                        |          |          | x        | x        | x        | x        |          |          |          |          |          |          |
| <b>Neuropsychology</b>                         | <b>T</b> | <b>A</b> |
| MWT-B                                          |          |          | x        |          |          |          |          |          |          |          |          |          |
| LNS-Task                                       |          |          | x        |          | x        |          |          |          |          |          |          |          |
| D2-R                                           |          |          | x        | x        | x        | x        |          |          |          |          |          |          |
| IGT                                            |          |          | x        | x        | x        | x        |          |          |          |          |          |          |
| DCCS                                           |          |          | x        | x        | x        | x        |          |          |          |          |          |          |
| <b>Magnetic resonance imaging</b>              | <b>T</b> | <b>A</b> |
| Field-Map                                      |          |          | x        | x        | x        | x        |          |          |          |          |          |          |
| Resting-State                                  |          |          | x        | x        | x        | x        |          |          |          |          |          |          |
| NICUETINE                                      |          |          | x        | x        | x        | x        |          |          |          |          |          |          |
| N-Back                                         |          |          | x        | x        | x        | x        |          |          |          |          |          |          |
| SST                                            |          |          | x        | x        | x        | x        |          |          |          |          |          |          |
| ALCUE                                          |          |          | x        | x        | x        | x        |          |          |          |          |          |          |
| MPRAGE                                         |          |          | x        | x        | x        | x        |          |          |          |          |          |          |
| <b>General questionnaires</b>                  | <b>T</b> | <b>A</b> |
| PANAS                                          |          |          | x        | x        | x        | x        | x        | x        | x        | x        | x        | x        |
| HSWBS                                          |          |          | x        | x        | x        | x        |          |          |          |          |          |          |
| GSE                                            |          |          | x        | x        |          |          |          |          |          |          |          |          |
| Rosenberg                                      |          |          | x        | x        |          |          |          |          |          |          |          |          |
| SWLS                                           |          |          | x        | x        | x        | x        |          |          |          |          | x        | x        |
| FSozU                                          |          |          | x        | x        |          |          |          |          |          |          |          |          |
| <b>Questionnaires - depression and anxiety</b> | <b>T</b> | <b>A</b> |
| BDI II                                         |          |          | x        | x        | x        | x        |          |          |          |          | x        | x        |
| PSS                                            |          |          | x        | x        | x        | x        |          |          |          |          | x        | x        |
| STAI (X1)                                      |          |          | x        | x        | x        | x        |          |          |          |          | x        | x        |
| STAI (X2)                                      |          |          | x        | x        |          |          |          |          |          |          |          |          |
| <b>Questionnaires – impulsivity and ADHD</b>   | <b>T</b> | <b>A</b> |
| ASRS-v1.1                                      |          |          | x        | x        | x        | x        |          |          |          |          |          |          |
| ADHS-SB                                        |          |          | x        |          | x        |          |          |          |          |          |          |          |
| BIS-15                                         |          |          | x        | x        | x        | x        |          |          |          |          | x        | x        |
| COHS                                           |          |          | x        | x        |          |          |          |          |          |          |          |          |
| <b>Questionnaires - alcohol</b>                | <b>T</b> | <b>A</b> |
| ACQ-SF-R                                       |          |          |          | x        |          | x        |          |          |          |          |          | x        |
| ADS                                            |          |          |          | x        |          |          |          |          |          |          |          |          |
| AUDIT                                          | x        | x        |          |          |          |          |          |          |          |          |          |          |

|    |                                 |  |  |          |          |          |          |          |          |          |          |
|----|---------------------------------|--|--|----------|----------|----------|----------|----------|----------|----------|----------|
| 3  | AUQ                             |  |  | x        |          | x        |          | x        |          | x        |          |
| 4  | CAS-A                           |  |  | x        |          | x        |          |          |          |          | x        |
| 5  | OCDS-G                          |  |  | x        |          | x        |          | x        |          | x        | x        |
| 6  | SRHI (alcohol)                  |  |  | x        |          | x        |          |          |          |          | x        |
| 7  | VACS for MRI (alcohol)          |  |  | x        | x        | x        | x        |          |          |          |          |
| 8  | <b>Questionnaires - tobacco</b> |  |  |          |          |          |          |          |          |          |          |
| 9  |                                 |  |  | <b>T</b> | <b>A</b> | <b>T</b> | <b>A</b> | <b>T</b> | <b>A</b> | <b>T</b> | <b>A</b> |
| 10 | OCSS                            |  |  |          |          | x        |          | x        |          | x        |          |
| 11 | CAS-CS                          |  |  | x        | x        | x        |          |          |          |          | x        |
| 12 | QSU                             |  |  | x        |          | x        |          | x        |          | x        |          |
| 13 | SCQ-A                           |  |  | x        |          | x        |          |          |          |          | x        |
| 14 | WSWS                            |  |  | x        |          | x        |          |          |          |          | x        |
| 15 | SRHI (tobacco)                  |  |  | x        |          | x        |          |          |          |          | x        |
| 16 | FTND                            |  |  | x        | x        | x        |          |          |          |          | x        |
| 17 | VACS for MRI (tobacco)          |  |  | x        |          | x        |          |          |          |          |          |

**Note:** S = Screening measurement, T1 = baseline and MRI assessment, T2 = MRI assessment, FU = monthly follow-ups via telephone; T3 = final follow-up via telephone; T = Tobacco use disorder; A = Alcohol use disorder; \* self-report.

SCID = Structured Clinical Interview for DSM-5; AUDIT = Alcohol Use Disorder Identification Test; CIWA-AR = Clinical Institute Withdrawal Assessment; MWT-B = Multiple-choice vocabulary test (German version); LNS = Letter-Number-Sequencing (Wechsler-Memory Scale-3); D2-R = d2-R Test of Attention; IGT = Iowa Gambling Task; DCCS = Dimensional Change Card Sort; NICUETINE = fMRI tobacco cue-reactivity task; N-Back = N-back fMRI task; SST = Stop-Signal-Reaction-Time Task for fMRI; ALCUE = fMRI alcohol cue-reactivity task; MPRAGE = Magnetization Prepared - RApid Gradient Echo sequence; PANAS = Positive and Negative Affect Schedule; HSWBS = Habitual Subjective Well-Being Questionnaire; GSE = General Self-Efficacy Scale; Rosenberg = Rosenberg self-esteem scale; SWLS = Satisfaction with Life Scale; FSozU = Perceived Social Support Questionnaire; BDI-II = Beck-Depression Inventory; PSS = Perceived Stress Scale; STAI (X1,X2) = State / Trait Anxiety Inventory; ASRS-v1.1 = Adult ADHD Self-Report Scale Symptom Checklist, Part A; ADHS-SB = ADHD Self-rating Scale; BIS-15 = Barrett Impulsiveness Scale; COHS = Creature of Habit Scale; ACQ-SF-R = Alcohol Craving Questionnaire – short form revised; ADS = Alcohol Dependence Scale; AUQ = Alcohol Urge Questionnaire; CAS-A = Craving Automated Scale for Alcohol; OCDS-G = Obsessive Compulsive Drinking Scale - German; SRHI = Self-Report Habit Index (German translation, adapted for alcohol); VACS = Visual Analog Craving Scales for alcohol before and after fMRI for alcohol; OCSS = Obsessive Compulsive Smoking Scale; CAS-CS = Craving Automated Scale for Cigarette Smoking; QSU = Questionnaire on Smoking Urges; SCQ-A = Smoking Consequences Questionnaire for Adults; WSWS = Wisconsin Smoking Withdrawal Scale; SRHI = Self-Report Habit Index (tobacco); FTND = Fagerström Test for Nicotine Dependence; VACS = Visual Analog Craving Scales before and after fMRI for tobacco.

## Figure captions

**Figure 1: Study design.** Following a screening, all participants will undergo a baseline (T1) appointment with diagnostic interviews, questionnaires, and functional magnetic resonance imaging measurements. Participants with tobacco or alcohol use disorder will be randomly assigned to the control group or intervention group. All participants will receive their respective treatment as usual. The intervention groups will additionally receive chess-based cognitive remediation training (CB-CRT). After the 6 week long treatment as usual with/without CB-CRT (T2), the same measurements as for T1 will take place. During the follow-up period of 12 weeks, all participants will be contacted via telephone once a month.

**Figure 2: Examples of the chess-based cognitive remediation training. 2a: Selective attention.** Participants are asked to count the number of white knights on white squares (right answer: 5, squares: b1, b7, c6, d7, f1). During the training, participants receive 6 boards within a maximum of three minutes. **2b: Short term memory.** Participants are focused on the board and see the position for a few seconds up to one minute. Afterwards, the instructor asks the participants to reconstruct the position. Participants are asked to go to the front of the group and rebuild the position. **2c: Executive functions, planification skills.** Participants must find out the shortest route the knight can go to capture the pawn. The knight must not stop on any square controlled by the rooks. The participant is asked to announce the number of moves before showing them on the board (correct answer: 4 moves – g5-e6-c7-b5-c3 or g5-e6-d4-b5-c3).

## Funding

This study is supported by a grant from the Deutsche Forschungsgemeinschaft (Grant ID 421888313). The Deutsche Forschungsgemeinschaft was not involved in the planning of the study, and will not be involved in data collection, analyses or publication procedures.

## Availability of data and materials

For protection of personal rights, and due to the sensitivity of the clinical and neuroimaging data, data will not be made publicly available. Upon direct request by other researchers and in mutual agreements (e.g., regarding data protection), anonymized data can be made available. Upon request, analysis procedures and codes will be shared with other researchers.

## Acknowledgements

We would like to thank Carmen Gaitan Coronado for their training in ECAM and their help in creating the therapy manual and Alycia Lee for English editing.

## Authors contributions

SVK designed the study. TW, GL, JH helped with designing the study. JAM developed the chess-based remediation training ECAM. GLX, JH, RS, AJR, DK, AW, SVK, SG adapted the training. SG, GL, and SVK wrote the manuscript. All authors read and approved the manuscript.

## Conflicts of interest

All authors have no conflict of interest to declare.

## References

- 1 Peacock A, Leung J, Larney S, et al. Global statistics on alcohol, tobacco and illicit drug use: 2017 status report. *Addiction*. 2018;113(10):1905-26.
- 2 Atzendorf J, Rauschert C, Seitz NN, Lochbuhler K, Kraus L. The Use of Alcohol, Tobacco, Illegal Drugs and Medicines. *Dtsch Arztebl Int*. 2019;116(35-36):577-84.
- 3 Konnopka A, Konig HH. Direct and indirect costs attributable to alcohol consumption in Germany. *Pharmacoeconomics*. 2007;25(7):605-18.
- 4 Neubauer S, Welte R, Beiche A, Koenig HH, Buesch K, Leidl R. Mortality, morbidity and costs attributable to smoking in Germany: update and a 10-year comparison. *Tob Control*. 2006;15(6):464-71.
- 5 Newcomb PA, Carbone PP. The health consequences of smoking. *Cancer. Med Clin North Am*. 1992;76(2):305-31.
- 6 Moos RH, Moos BS. Rates and predictors of relapse after natural and treated remission from alcohol use disorders. *Addiction*. 2006;101(2):212-22.
- 7 Miller WR, Walters ST, Bennett ME. How effective is alcoholism treatment in the United States? *Journal of studies on alcohol*. 2001;62(2):211-20.
- 8 Anton RF, O'Malley SS, Ciraulo DA, et al. Combined pharmacotherapies and behavioral interventions for alcohol dependence: the COMBINE study: a randomized controlled trial. *Jama*. 2006;295(17):2003-17.
- 9 Hughes JR, Peters EN, Naud S. Relapse to smoking after 1 year of abstinence: a meta-analysis. *Addict Behav*. 2008;33(12):1516-20.
- 10 von der Goltz C, Kiefer F. Learning and memory in the aetiopathogenesis of addiction: future implications for therapy? *Eur Arch Psychiatry Clin Neurosci*. 2009;259 Suppl 2:S183-7.
- 11 West R. Tobacco smoking: Health impact, prevalence, correlates and interventions. *Psychology & Health*. 2017;32(8):1018-36.
- 12 Sinha R. New findings on biological factors predicting addiction relapse vulnerability. *Current psychiatry reports*. 2011;13(5):398-405.
- 13 Nebe S, Kroemer NB, Schad DJ, et al. No association of goal-directed and habitual control with alcohol consumption in young adults. *Addiction Biology*. 2018;23(1):379-93.
- 14 Hogarth L, Lam-Cassettari C, Pacitti H, et al. Intact goal-directed control in treatment-seeking drug users indexed by outcome-devaluation and Pavlovian to instrumental transfer: critique of habit theory. *European Journal of Neuroscience*. 2019;50(3):2513-25.
- 15 Hogarth L. Addiction is driven by excessive goal-directed drug choice under negative affect: translational critique of habit and compulsion theory. *Neuropsychopharmacology*. 2020;45(5):720-35.
- 16 Garavan H, Hester R. The role of cognitive control in cocaine dependence. *Neuropsychol Rev*. 2007;17(3):337-45.
- 17 Sjoerds Z, de Wit S, van den Brink W, et al. Behavioral and neuroimaging evidence for overreliance on habit learning in alcohol-dependent patients. *Translational Psychiatry*. 2013;3(12):e337-e.
- 18 Ersche KD, Gillan CM, Jones PS, et al. Carrots and sticks fail to change behavior in cocaine addiction. *Science (New York, NY)*. 2016;352(6292):1468-71.
- 19 Sebold M, Deserno L, Nebe S, et al. Model-Based and Model-Free Decisions in Alcohol Dependence. *Neuropsychobiology*. 2014;70(2):122-31.
- 20 Bechara A. Decision making, impulse control and loss of willpower to resist drugs: a neurocognitive perspective. *Nat Neurosci*. 2005;8(11):1458-63.
- 21 Kirby KN, Petry NM. Heroin and cocaine abusers have higher discount rates for delayed rewards than alcoholics or non-drug-using controls. *Addiction*. 2004;99(4):461-71.
- 22 Yucel M, Lubman DI, Solowij N, Brewer WJ. Understanding drug addiction: a neuropsychological perspective. *Aust N Z J Psychiatry*. 2007;41(12):957-68.
- 23 Berkman ET, Falk EB, Lieberman MD. In the trenches of real-world self-control: neural correlates of breaking the link between craving and smoking. *Psychol Sci*. 2011;22(4):498-506.

- 1  
2  
3 24 Vollstädt-Klein S, Hermann D, Rabinstein J, et al. Increased activation of the ACC during a spatial  
4 working memory task in alcohol-dependence versus heavy social drinking. *Alcohol Clin Exp Res*.  
5 2010;34(5):771-6.  
6 25 Hamonniere T, Varescon I. Metacognitive beliefs in addictive behaviours: A systematic review.  
7 *Addictive behaviors*. 2018;85:51-63.  
8 26 Pintrich PR. The Role of Metacognitive Knowledge in Learning, Teaching, and Assessing. *Theory*  
9 *Into Practice*. 2002;41(4):219-25.  
10 27 Fleur DS, Bredeweg B, van den Bos W. Metacognition: ideas and insights from neuro- and  
11 educational sciences. *npj Science of Learning*. 2021;6(1):13.  
12 28 Cella M, Reeder C, Wykes T. Group cognitive remediation for schizophrenia: Exploring the role of  
13 therapist support and metacognition. *Psychol Psychother*. 2015.  
14 29 Wykes T, Spaulding WD. Thinking about the future cognitive remediation therapy--what works  
15 and could we do better? *Schizophr Bull*. 2011;37 Suppl 2:S80-90.  
16 30 Kiluk BD, Nich C, Babuscio T, Carroll KM. Quality versus quantity: acquisition of coping skills  
17 following computerized cognitive-behavioral therapy for substance use disorders. *Addiction*.  
18 2010;105(12):2120-7.  
19 31 Danner UN, Dingemans AE, Steinglass J. Cognitive remediation therapy for eating disorders. *Curr*  
20 *Opin Psychiatry*. 2015;28(6):468-72.  
21 32 Cella M, Reeder C, Wykes T. Lessons learnt? The importance of metacognition and its implications  
22 for Cognitive Remediation in schizophrenia. *Front Psychol*. 2015;6:1259.  
23 33 Cella M, Edwards C, Swan S, Elliot K, Reeder C, Wykes T. Exploring the effects of cognitive  
24 remediation on metacognition in people with schizophrenia. *Journal of Experimental*  
25 *Psychopathology*. 2019;10(2):2043808719826846.  
26 34 Montemagni C, Del Favero E, Riccardi C, et al. Effects of Cognitive Remediation on Cognition,  
27 Metacognition, and Social Cognition in Patients With Schizophrenia. *Front Psychiatry*.  
28 2021;12:649737.  
29 35 Bates ME, Buckman JF, Nguyen TT. A role for cognitive rehabilitation in increasing the  
30 effectiveness of treatment for alcohol use disorders. *Neuropsychol Rev*. 2013;23(1):27-47.  
31 36 Sofuoglu M, DeVito EE, Waters AJ, Carroll KM. Cognitive Function as a Transdiagnostic Treatment  
32 Target in Stimulant Use Disorders. *J Dual Diagn*. 2016;12(1):90-106.  
33 37 Bernardin F, Maheut-Bosser A, Paille F. Cognitive Impairments in Alcohol-Dependent Subjects.  
34 *Frontiers in Psychiatry*. 2014;5(78).  
35 38 Spada MM, Caselli G, Wells A. A Triphasic Metacognitive Formulation of Problem Drinking. *Clinical*  
36 *Psychology & Psychotherapy*. 2013;20(6):494-500.  
37 39 Blasco-Fontecilla H, Gonzalez-Perez M, Garcia-Lopez R, et al. Efficacy of chess training for the  
38 treatment of ADHD: A prospective, open label study. *Rev Psiquiatr Salud Ment*. 2015.  
39 40 Nour ELDaou BM, El-Shamieh SI. The Effect Of Playing Chess On The Concentration Of ADHD  
40 Students In The 2nd Cycle. *Procedia - Social and Behavioral Sciences*. 2015;192:638 – 43.  
41 41 Heinrichs RW, Zakzanis KK. Neurocognitive deficit in schizophrenia: a quantitative review of the  
42 evidence. *Neuropsychology*. 1998;12(3):426-45.  
43 42 Demily C, Cavezian C, Desmurget M, Berquand-Merle M, Chambon V, Franck N. The game of chess  
44 enhances cognitive abilities in schizophrenia. *Schizophr Res*. 2009;107(1):112-3.  
45 43 Sala G, Gobet F. Does chess instruction improve mathematical problem-solving ability? Two  
46 experimental studies with an active control group. *Learn Behav*. 2017;45(4):414-21.  
47 44 First MB. Structured Clinical Interview for the DSM(5) (SCID). In: Cautin RL, Lilienfeld SO, editors. *The*  
48 *Encyclopedia of Clinical Psychology* 2015. p. 1-6.  
49 45 Batra A, Kiefer F, Andreas S, et al. S3-Leitlinie „Rauchen und Tabakabhängigkeit: Screening,  
50 Diagnostik und Behandlung“. *Sucht*. 2021.  
51 46 Stead LF, Carroll AJ, Lancaster T. Group behaviour therapy programmes for smoking cessation.  
52 *Cochrane Database of Systematic Reviews*. 2017(3).  
53 47 Batra A. Tabakentwöhnung. Buchkremer G, editor. 70565 Stuttgart: W. Kohlhammer Verlag; 2012.  
54 48 Kiefer F, Batra A, Bischof G, et al. S3-Leitlinie „Screening, Diagnose und Behandlung  
55 alkoholbezogener Störungen“. *Sucht*. 2021.



- 1  
2  
3 49 Tombaugh TN. Trail Making Test A and B: Normative data stratified by age and education.  
4 *Archives of Clinical Neuropsychology*. 2004;19(2):203-14.  
5 50 Berg WK, Byrd DL. The Tower of London spatial problem-solving task: Enhancing clinical and  
6 research implementation. *Journal of Clinical and Experimental Neuropsychology*. 2002;24(5):586-604.  
7 51 Kiresuk TJ, Lund SH, Larsen NE. Measurement of goal attainment in clinical and health care  
8 programs. *Drug Intell Clin Pharm*. 1982;16(2):145-53.  
9 52 Rosenberg MJ. Society and the adolescent self-image. Princeton: Princeton University Press; 1965.  
10 53 Schwarzer RJ, M. (Hrsg.). Skalen zur Erfassung von Lehrer- und Schülermerkmalen.  
11 Dokumentation der psychometrischen Verfahren im Rahmen der Wissenschaftlichen Begleitung  
12 des  
13  
14 Modellversuchs Selbstwirksame Schulen. Berlin: Freie Universität; 1999.  
15 54 Kliem S, Mossle T, Rehbein F, Hellmann DF, Zenger M, Brahler E. A brief form of the Perceived  
16 Social Support Questionnaire (F-SozU) was developed, validated, and standardized. *J Clin Epidemiol*.  
17 2015;68(5):551-62.  
18 55 Pouwer F, Snoek FJ, van der Ploeg HM, Ader HJ, Heine RJ. The well-being questionnaire: evidence  
19 for a three-factor structure with 12 items (W-BQ12). *Psychol Med*. 2000;30(2):455-62.  
20 56 Diener E, Emmons RA, Larsen RJ, Griffin S. The Satisfaction With Life Scale. *J Pers Assess*.  
21 1985;49(1):71-5.  
22 57 Watson D, Clark LA, Tellegen A. Development and validation of brief measures of positive and  
23 negative affect: the PANAS scales. *J Pers Soc Psychol*. 1988;54(6):1063-70.  
24 58 Laux L, Glanzmann P, Schaffner P, Spielberger C. STAI. *State-Trait-Angstinventar Göttingen: Beltz*  
25 *Test GmbH*. 1981.  
26 59 Hautzinger M, Bailer M, Worrall H, Keller F. Das Beck-Depressions-Inventar (BDI). Überarbeitet  
27 und ergänzte Neuauflage. Bern: Hans Huber; 1995.  
28 60 Kühner C, Bürger C, Keller F, Hautzinger M. [Reliability and validity of the Revised Beck Depression  
29 Inventory (BDI-II). Results from German samples]. *Der Nervenarzt*. 2007;78(6):651-6.  
30 61 Cohen S, Kamarck T, Mermelstein R. A global measure of perceived stress. *J Health Soc Behav*.  
31 1983;24(4):385-96.  
32 62 Patton JH, Stanford MS, Barratt ES. Factor structure of the Barratt impulsiveness scale. *J Clin*  
33 *Psychol*. 1995;51(6):768-74.  
34 63 Meule A, Vögele C, Kübler A. Psychometrische Evaluation der deutschen Barratt Impulsiveness  
35 Scale – Kurzversion (BIS-15). *Diagnostica*. 2011;57(3):126-33.  
36 64 Reyes MM, Schneekloth TD, Hitschfeld MJ, Geske JR, Atkinson DL, Karpyak VM. The Clinical Utility  
37 of ASRS-v1.1 for Identifying ADHD in Alcoholics Using PRISM as the Reference Standard. *Journal of*  
38 *Attention Disorders*. 2016;23(10):1119-25.  
39 65 Rösler M, Retz W, Retz-Junginger P, et al. [Tools for the diagnosis of attention-deficit/hyperactivity  
40 disorder in adults. Self-rating behaviour questionnaire and diagnostic checklist]. *Der Nervenarzt*.  
41 2004;75(9):888-95.  
42 66 Ersche KD, Lim TV, Ward LHE, Robbins TW, Stoohill J. Creature of Habit: A self-report measure of  
43 habitual routines and automatic tendencies in everyday life. *Pers Individ Dif*. 2017;116:73-85.  
44 67 Verplanken B, Orbell S. Reflections on Past Behavior: A Self-Report Index of Habit Strength.  
45 *Journal of Applied Social Psychology*. 2003;33:1313-30.  
46 68 Heatherton TF, Kozlowski LT, Frecker RC, Fagerstrom KO. The Fagerstrom Test for Nicotine  
47 Dependence: a revision of the Fagerstrom Tolerance Questionnaire. *British journal of addiction*.  
48 1991;86(9):1119-27.  
49 69 Babor TF, Higgins-Biddle JC, Saunders JB, Monteiro MG. Geneva: World Health Organization. 2001.  
50 Available from: <http://www.who.int/iris/handle/10665/67205>.  
51 70 Sullivan JT, Sykora K, Schneiderman J, Naranjo CA, Sellers EM. Assessment of alcohol withdrawal:  
52 the revised clinical institute withdrawal assessment for alcohol scale (CIWA-Ar). *British journal of*  
53 *addiction*. 1989;84(11):1353-7.  
54 71 Nakovics H, Diehl A, Croissant B, Mann K. Modifications of the Obsessive Compulsive Drinking  
55 Scale (OCDs-G) for use in longitudinal studies. *Addict Behav*. 2008;33(10):1276-81.  
56  
57  
58  
59  
60



- 1  
2  
3 72 Singleton T, Henningfield. Development and validation of a new questionnaire to assess craving  
4 for alcohol. *Problems of Drug Dependence*, 1994. 1995;11:1.  
5 73 Vollstadt-Klein S, Lemenager T, Jorde A, Kiefer F, Nakovics H. Development and validation of the  
6 craving automated scale for alcohol. *Alcoholism, clinical and experimental research*. 2015;39(2):333-  
7 42.  
8 74 Bohn MJ, Krahn DD, Staehler BA. Development and initial validation of a measure of drinking  
9 urges in abstinent alcoholics. *Alcoholism, clinical and experimental research*. 1995;19(3):600-6.  
10 75 Skinner HA, Allen BA. Alcohol dependence syndrome: measurement and validation. *Journal of*  
11 *abnormal psychology*. 1982;91(3):199-209.  
12 76 Scheurich A, Muller MJ, Angheliescu I, et al. Reliability and validity of the form 90 interview. *Eur*  
13 *Addict Res*. 2005;11(1):50-6.  
14 77 Tiffany ST, Drobes DJ. The development and initial validation of a questionnaire on smoking urges.  
15 *Br J Addict*. 1991;86(11):1467-76.  
16 78 Vollstadt-Klein S, Kobiella A, Buhler M, et al. Severity of dependence modulates smokers' neuronal  
17 cue reactivity and cigarette craving elicited by tobacco advertisement. *Addiction biology*.  
18 2011;16(1):166-75.  
19 79 Hitsman B, Shen BJ, Cohen RA, et al. Measuring smoking-related preoccupation and compulsive  
20 drive: evaluation of the obsessive compulsive smoking scale. *Psychopharmacology (Berl)*.  
21 2010;211(4):377-87.  
22 80 Rash CJ, Copeland AL. The Brief Smoking Consequences Questionnaire-Adult (BSCQ-A):  
23 development of a short form of the SCQ-A. *Nicotine Tob Res*. 2008;10(11):1633-43.  
24 81 Castro Y, Kendzor DE, Businelle MS, et al. Structural and predictive equivalency of the Wisconsin  
25 Smoking Withdrawal Scale across three racial/ethnic groups. *Nicotine Tob Res*. 2011;13(7):548-55.  
26 82 Sayette MA, Shiffman S, Tiffany ST, Niaura RS, Martin CS, Shadel WG. The measurement of drug  
27 craving. *Addiction*. 2000;95 Suppl 2:S189-210.  
28 83 Kent P. The Evolution of the Wechsler Memory Scale: A Selective Review. *Appl Neuropsychol*  
29 *Adult*. 2013;20(4):277-91.  
30 84 Bechara A, Damasio AR, Damasio H, Anderson SW. Insensitivity to future consequences following  
31 damage to human prefrontal cortex. *Cognition*. 1994;50(1-3):7-15.  
32 85 Zelazo PD, Anderson JE, Richler J, et al. NIH Toolbox Cognition Battery (CB): validation of executive  
33 function measures in adults. *J Int Neuropsychol Soc*. 2014;20(6):620-9.  
34 86 Brickenkamp R. Aufmerksamkeits-Belastungs-Test. 9., überarbeitete und neu normierte Auflage  
35 [d2 Test of attention, 9th revised edn.]. Hogrefe V, editor. Göttingen 2002.  
36 87 Whelan R, Conrod PJ, Poline JB, et al. Adolescent impulsivity phenotypes characterized by distinct  
37 brain networks. *Nat Neurosci*. 2012;15(6):920-5.  
38 88 Vollstädt-Klein S, Loeber S, Kirsch M, et al. Effects of Cue-Exposure Treatment on Neural Cue  
39 Reactivity in Alcohol Dependence: A Randomized Trial. *Biol Psychiatry*. 2011;69(11):1060-6.  
40 89 Charlet K, Beck A, Jorde A, et al. Increased neural activity during high working memory load  
41 predicts low relapse risk in alcohol dependence. *Addiction biology*. 2014;19(3):402-14.  
42 90 Xu J, Moeller S, Auerbach EJ, et al. Evaluation of slice accelerations using multiband echo planar  
43 imaging at 3 T. *NeuroImage*. 2013;83:991-1001.  
44 91 Whelan R, Conrod PJ, Poline JB, et al. Adolescent impulsivity phenotypes characterized by distinct  
45 brain networks. *Nat Neurosci*. 2012;15(6):920-5.  
46 92 Brevers D, Bechara A, Cleeremans A, Noel X. Iowa Gambling Task (IGT): twenty years after –  
47 gambling disorder and IGT. *Frontiers in Psychology*. 2013;4(665).  
48 93 Bates ME, Lemay EP. The d2 Test of Attention: Construct validity and extensions in scoring  
49 techniques. *Journal of the International Neuropsychological Society*. 2004;10(3):392-400.  
50 94 Faul F, Erdfelder E, Lang A-G, Buchner A. G\*Power 3: A flexible statistical power analysis program  
51 for the social, behavioral, and biomedical sciences. *Behavior research methods*. 2007;39(2):175-91.  
52  
53  
54  
55  
56  
57  
58  
59  
60

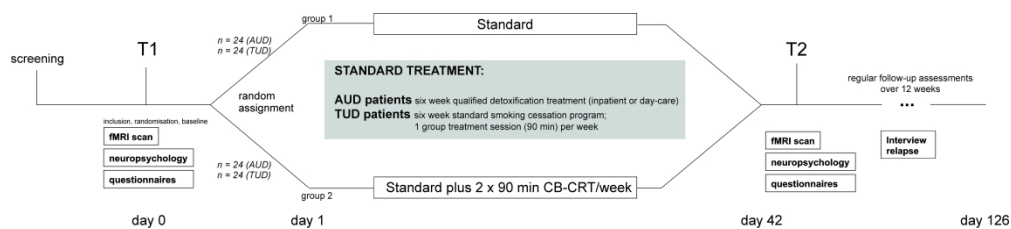

Figure 1: Study design.

456x98mm (300 x 300 DPI)

1  
2  
3  
4  
5  
6  
7  
8  
9  
10  
11  
12  
13  
14  
15  
16  
17  
18  
19  
20  
21  
22  
23  
24  
25  
26  
27  
28  
29  
30  
31  
32  
33  
34  
35  
36  
37  
38  
39  
40  
41  
42  
43  
44  
45  
46  
47  
48  
49  
50  
51  
52  
53  
54  
55  
56  
57  
58  
59  
60

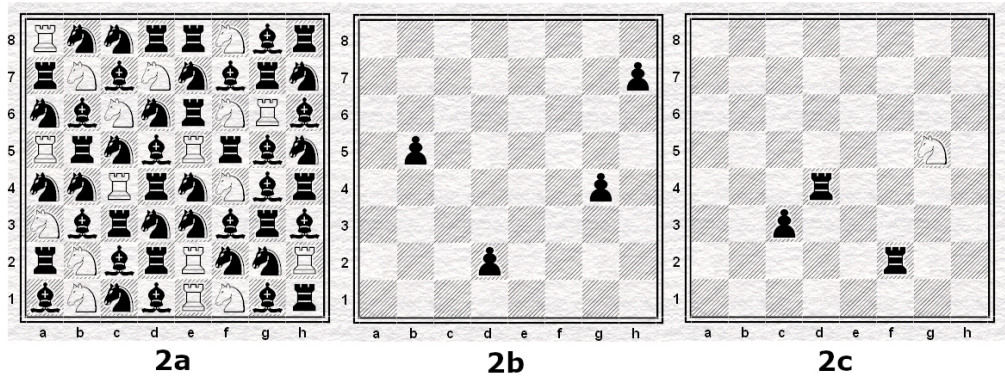

Figure 2: Examples of the chess-based cognitive remediation training.

98x38mm (300 x 300 DPI)

# BMJ Open

## Effects of chess-based cognitive remediation training as therapy add-on in alcohol and tobacco use disorders: protocol of a randomized, controlled fMRI study

|                                 |                                                                                                                                                                                                                                                                                                                                                                                                                                                                                                                                                                                                                                                                                                                                                                                                                                                                                                                                                                                                                                                                   |
|---------------------------------|-------------------------------------------------------------------------------------------------------------------------------------------------------------------------------------------------------------------------------------------------------------------------------------------------------------------------------------------------------------------------------------------------------------------------------------------------------------------------------------------------------------------------------------------------------------------------------------------------------------------------------------------------------------------------------------------------------------------------------------------------------------------------------------------------------------------------------------------------------------------------------------------------------------------------------------------------------------------------------------------------------------------------------------------------------------------|
| Journal:                        | <i>BMJ Open</i>                                                                                                                                                                                                                                                                                                                                                                                                                                                                                                                                                                                                                                                                                                                                                                                                                                                                                                                                                                                                                                                   |
| Manuscript ID                   | bmjopen-2021-057707.R1                                                                                                                                                                                                                                                                                                                                                                                                                                                                                                                                                                                                                                                                                                                                                                                                                                                                                                                                                                                                                                            |
| Article Type:                   | Protocol                                                                                                                                                                                                                                                                                                                                                                                                                                                                                                                                                                                                                                                                                                                                                                                                                                                                                                                                                                                                                                                          |
| Date Submitted by the Author:   | 04-May-2022                                                                                                                                                                                                                                                                                                                                                                                                                                                                                                                                                                                                                                                                                                                                                                                                                                                                                                                                                                                                                                                       |
| Complete List of Authors:       | Gerhardt, Sarah; Central Institute of Mental Health, Department of Addictive Behavior and Addiction Medicine<br>Lex, Gereon; Central Institute of Mental Health, Department of Addictive Behavior and Addiction Medicine<br>Holzammer, Jennifer; Central Institute of Mental Health, Department of Addictive Behavior and Addiction Medicine<br>Karl, Damian; Central Institute of Mental Health, Department of Addictive Behavior and Addiction Medicine<br>Wieland, Alfred; Central Institute of Mental Health, Institute of Cognitive and Clinical Neuroscience<br>Schmitt, Roland; Central Institute of Mental Health, Department of Addictive Behavior and Addiction Medicine<br>Recuero, Ainoa Jiménez; Club de Ajedrez Magic de Extremadura, Mérida<br>Montero, Juan Antonio; Club de Ajedrez Magic de Extremadura, Mérida<br>Weber, Tillmann; Median Klinik Wilhelmsheim<br>Vollstädt-Klein, Sabine; Central Institute of Mental Health, Department of Addictive Behaviour and Addiction Medicine; Mannheim Center for Translational Neurosciences (MCTN) |
| <b>Primary Subject Heading</b>: | Addiction                                                                                                                                                                                                                                                                                                                                                                                                                                                                                                                                                                                                                                                                                                                                                                                                                                                                                                                                                                                                                                                         |
| Secondary Subject Heading:      | Addiction                                                                                                                                                                                                                                                                                                                                                                                                                                                                                                                                                                                                                                                                                                                                                                                                                                                                                                                                                                                                                                                         |
| Keywords:                       | Substance misuse < PSYCHIATRY, Adult psychiatry < PSYCHIATRY, Magnetic resonance imaging < RADIOLOGY & IMAGING                                                                                                                                                                                                                                                                                                                                                                                                                                                                                                                                                                                                                                                                                                                                                                                                                                                                                                                                                    |
|                                 |                                                                                                                                                                                                                                                                                                                                                                                                                                                                                                                                                                                                                                                                                                                                                                                                                                                                                                                                                                                                                                                                   |

SCHOLARONE™  
Manuscripts

1  
2  
3 **Effects of chess-based cognitive remediation training as therapy add-on in alcohol and**  
4 **tobacco use disorders: protocol of a randomized, controlled fMRI study**  
5

6  
7 *Sarah Gerhardt<sup>1</sup>, Gereon Lex<sup>1</sup>, Jennifer Holzammer<sup>1</sup>, Damian Karl<sup>1</sup>, Alfred Wieland<sup>2</sup>, Roland*  
8 *Schmitt<sup>1</sup>, Ainoa Jiménez Recuero<sup>3</sup>, Juan Antonio Montero<sup>3</sup>, Tillmann Weber<sup>4</sup>, Sabine Vollstädt-*  
9 *Klein<sup>1,5</sup> #*  
10

11  
12 <sup>1</sup> Department of Addictive Behavior and Addiction Medicine, Central Institute of Mental Health,  
13 Medical Faculty Mannheim, Heidelberg University, Mannheim, Germany.  
14

15  
16 <sup>2</sup> Institute of Cognitive and Clinical Neuroscience, Central Institute of Mental Health, Medical Faculty  
17 Mannheim, Heidelberg University, Mannheim, Germany.  
18

19  
20 <sup>3</sup> Club de Ajedrez Magic de Extremadura, Mérida, Badajoz, Spain.  
21

22  
23 <sup>4</sup> MEDIAN Kliniken Wilhelmsheim, Oppenweiler, Germany.  
24

25  
26 <sup>5</sup> Mannheim Center for Translational Neurosciences (MCTN), Medical Faculty Mannheim, Heidelberg  
27 University, Mannheim, Germany.  
28

29  
30 # Corresponding Author  
31

32  
33 Sabine Vollstädt-Klein, Department of Addictive Behavior and Addiction Medicine, Central Institute of  
34 Mental Health, Mannheim, Medical Faculty Mannheim, University of Heidelberg, Germany, PO Box  
35 12 21 20, D-68072 Mannheim, Germany. Tel.: 0621 1703-3912, Fax: 0621 1703-3505, E-mail:  
36 S.Vollstaedt-Klein@zi-mannheim.de  
37  
38  
39  
40  
41  
42  
43  
44  
45  
46  
47  
48  
49  
50  
51  
52  
53  
54  
55  
56  
57  
58  
59  
60

## Abstract

### **Background**

Alcohol and tobacco use disorders (AUD, TUD) are frequent, both worldwide and in the German population, and cognitive impairments are known to facilitate instances of relapse. Cognitive training has been proposed for enhancing cognitive functioning and possibly improving treatment outcome in mental disorders. However, these effects and underlying neurobiological mechanisms are not yet fully understood regarding AUD and TUD. Examining the effect of chess-based cognitive remediation training (CB-CRT) on neurobiological, neuropsychological and psychosocial aspects as well as treatment outcomes will provide insights into mechanisms underlying relapse and abstinence and might help to improve health behaviour in affected individuals if used as therapy add-on.

### **Methods and Analysis**

N=96 individuals with either AUD (N=48) or TUD (N=48) between the ages of 18 and 65 years will be randomized to four treatment groups. Two control groups will receive treatment as usual, i.e., AUD treatment in a clinic, TUD outpatient treatment. Two therapy add-on groups will receive a 6-week CB-CRT as a therapy add-on. functional magnetic resonance imaging (fMRI) tasks, neurocognitive tests will be administered before and afterwards. All individuals will be followed up on monthly for three months. Endpoints include alterations in neural activation and neuropsychological task performance, psychosocial functioning, and relapse or substance intake. Regarding fMRI analyses, a General Linear Model (GLM) will be applied and t-tests, full factorial models and regression analyses will be conducted on the second level. Behavioural and psychometric data will be analysed using t-tests, regression analyses, repeated-measures and one-way ANOVAs.

### **Ethics and Dissemination**

This study has been approved by the ethics committee of the Medical Faculty Mannheim of the University of Heidelberg (2017-647N-MA). The findings of this study will be presented at conferences and published in peer-reviewed journals.

### **Trial registration**

The study was registered in the Clinical Trials Register (trial identifier: NCT04057534 at [clinicaltrials.gov](http://clinicaltrials.gov)).

### Strengths and Limitations of this study

- The evaluation of the efficacy of CB-CRT as a supportive therapy add-on for SUD might lead to cost-efficient positive treatment outcomes.
- The use of objective measures to examine underlying neurobiopsychological mechanisms expands the current research on risk factors for relapse.
- The inclusion of two substances (alcohol and tobacco) increases the generalizability of the findings.
- The 6-week long therapy add-on might lead to drop-outs due to the large amount of time participants have to commit to the program.

For peer review only

## Introduction

Substance use, including alcohol and tobacco use, is widespread both worldwide and in the German population. Worldwide, the prevalence for heavy episodic drinking of alcohol was estimated at 18.4% for adults, while daily smoking was estimated at 15.2%[1]. In 2018 in Germany, the prevalence of hazardous consumption of alcohol was estimated at 19.1%, and the 12-month prevalence for alcohol use disorder (AUD) at 5.9%. The prevalence of daily consumption of tobacco was estimated at 15.1%, and the 12-month prevalence for tobacco use disorder (TUD) at 8.6%[2]. In Germany, follow-up costs of alcohol use are estimated at 21 billion euros[3] and for tobacco use at 24 billion euros[4]. Furthermore, negative effects on health and on mortality rates are associated with TUD[5].

For individuals with AUD having undergone treatment, relapse rates between 22 and 86% have been observed during short-term follow-ups (16 weeks) up to a long-term follow-up of 16 years[6-8]. Following treatment, the relapse rate for TUD after one year is estimated to be between 2 and 17%[9]. A relapse can be brought on by heightened stress sensitivity, depressive mood, increased anxiety, or confrontation with a substance-related stimulus[10-12].

Even though some studies postulate intact, goal-directed behaviour in individuals with SUD [13-15], others observed neurobiological impairments in brain areas involved in inhibitory control in individuals with SUD[16-19]. In a model proposed by Bechara, SUD is viewed as an imbalance between two distinct, but closely interacting neural systems[20], which are essential for decision-making: The impulsive system is involved in the prediction and valuation of immediate rewards and includes such regions as the amygdala and the striatum. The reflective system signals long-term consequences of actions and involves the ventromedial prefrontal cortex (VMPFC), the dorsolateral prefrontal cortex (DLPFC), the anterior cingulate, the insula, and the hippocampus. In SUD, it is assumed that the impulsive system becomes overactive, preventing the reflective system from exerting executive cognitive control over substance use. It might be those immediate rewards, such as pleasant effects derived from alcohol or nicotine consumption, are overvalued, and give preference over future rewards, such as health benefits associated with abstinence. Individuals with SUD also demonstrate a preference for smaller, immediate monetary rewards over larger, delayed ones[21]. Furthermore, the imbalance between impulsive and reflective systems reveals itself in dysfunctional inhibitory control, leading to increased risk taking[20]. Beyond these



1  
2  
3 impairments, individuals with SUD also demonstrate reduced cognitive functioning in the  
4 domains of problem solving, mental flexibility, forming judgments, and working memory[22].  
5 A study using functional magnetic resonance imaging (fMRI)[23] found less activation in the  
6 right frontal cortex during a response inhibition task was associated with more cigarettes  
7 smoked in participants wanting to quit smoking. Other studies using fMRI have revealed a shift  
8 of neural activation from the ventral (nucleus accumbens) to the dorsal striatum (putamen  
9 and nucleus caudate), which was suggested to reflect a decrease in cortical control when  
10 viewing substance related cues [24]. Being related to executive functions, metacognitive  
11 abilities and beliefs play a major role in addiction[25]. In general, metacognition refers to the  
12 ability to know about cognition in general but, more importantly, to be aware of and know  
13 about one's own cognition[26]. Prefrontal regions, as well as the precuneus or dorsal anterior  
14 cingulate cortex seem to play an important role[27]. Generic and dysfunctional metacognitive  
15 beliefs, but also metacognitive beliefs about addiction-related thoughts or craving can predict  
16 the severity of addictive behaviour, craving, and relapse[25].

17  
18 „Cognitive remediation“ (Cognitive remediation therapy (CRT)) is a psychotherapeutic  
19 approach to improve cognitive deficits[28]. Cognitive training exercises span functional  
20 domains from executive functioning (inhibition, decision-making, cognitive flexibility, and  
21 working memory) to attention. Through repeated training, CRT can systematically stimulate  
22 and strengthen cognitive processes. A primary therapeutic objective is to improve the efficacy  
23 of other psychotherapeutic interventions, which require a minimal level of cognitive skill[29].  
24 For example, it has been demonstrated that executive functioning skills can influence the  
25 efficacy of cognitive behavioural therapy[30]. CRT, specifically, has already been  
26 demonstrated to be successful as an add-on therapy in treating schizophrenia and eating  
27 disorders[31]. However, it has been suggested to explicitly teach metacognitive abilities in  
28 order to improve the outcome of CRT[32], since this might be a significant mechanism  
29 contributing to the effects of CRT in patients with schizophrenia[33]. Indeed, recent  
30 observations indicate a beneficial effect of CRT on metacognitive abilities, e.g., in  
31 schizophrenia[34]. As an add-on therapy to treat substance use disorders CRT seems  
32 promising[35] and cognitive training mostly results in improvements within the respective  
33 domains[36]. However, there is a lack of studies examining the efficacy of CRT as a modulator  
34 of cognition to improve treatment outcomes[37] and findings on the positive outcome  
35 following cognitive trainings in AUD are still mixed[38] or not present[39]. A review on

1  
2  
3 AUD[40] discussed that CRT improves split attention, recognition of warning signals, working  
4 memory, as well as episodic memory. Most relevantly, an improvement in working memory  
5 and inhibitory control was able to exert a positive influence on substance use patterns[40].  
6  
7 Additionally, including metacognitive trainings when treating individuals with SUD might be  
8 advantageous[25, 41].  
9  
10

11  
12 Finally, promising studies have demonstrated a potential beneficial effect of classical chess  
13 training on the treatment of attention deficit hyperactivity disorder (ADHD) and schizophrenia  
14 as an add-on therapy. In the case of ADHD, classical chess training was able to effectively  
15 reduce disease severity[42]. A further study in patients with ADHD showed an improvement  
16 in the ability to concentrate[43]. Negative symptoms common to patients suffering from  
17 schizophrenia include a wide variety of cognitive deficits, including impaired attention-,  
18 memory-, learning- and problem-solving skills[44]. Chess training was able to rescue some of  
19 these deficits experienced by schizophrenic patients, improving voluntary processing,  
20 inhibitory capacity and planning proficiencies[45]. Examining the effects of chess training on  
21 mathematical problem-solving and metacognitive abilities in school children, no significant  
22 effects were observed compared to an active control group playing checkers and a passive  
23 control group[46].  
24  
25

26  
27 Besides the known effects of CRT on metacognition, the beneficial effect of chess-based CRT  
28 still remains unclear. However, present findings suggest that chess-based CRT might be able  
29 to improve cognitive functioning in domains which can be improved by classical CRT, while  
30 simultaneously potentially improving specific domains modulated by chess-based  
31 interventions.  
32  
33

34  
35 Consequently, our study aims to assess the effects of chess-based CRT (CB-CRT) on underlying  
36 neurobiological mechanisms of CB-CRT in AUD and TUD. We will use a novel and structured  
37 training program that, besides training cognitive functioning, includes metacognitive methods  
38 and social reinforcement. As a result of the comprehensiveness of the proposed study and the  
39 novel CB-CRT we will further assess the influence of CB-CRT on different aspects of cognition  
40 and psychosocial functioning as well as treatment outcome in individuals with AUD and TUD.  
41  
42  
43  
44  
45  
46  
47  
48  
49  
50  
51  
52  
53  
54  
55  
56

## 57 **Method and Analyses**

58  
59  
60

1  
2  
3 To investigate the effects of CB-CRT as a therapy add-on in alcohol and tobacco use disorders,  
4 N = 96 individuals will be examined. N = 48 AUD participants undergoing a qualified therapy  
5 or rehabilitation treatment for alcohol use disorder and N = 48 TUD participants who  
6 participate in a qualified smoking cessation group therapy will be included in the study. The  
7 Consolidated Standards Reporting Trials (CONSORT) statement was used for developing the  
8 study framework. Individuals with a diagnosis of AUD will be recruited from the out-patient  
9 and in-patient clinics of the Department of Addictive Behaviour and Addiction Medicine at the  
10 Central Institute of Mental Health and from the residential addiction treatment center  
11 MEDIAN Klinik Wilhelmsheim, Germany. Individuals with TUD will be recruited using public  
12 announcements including, flyers, and social media posts.

13  
14 Half of each group (AUD, TUD) will be randomly assigned to either the control group or  
15 experimental group. Regarding the control groups, N = 24 AUD participants receive an in-  
16 patient qualified detoxification treatment program, an in- or out-patient rehabilitation  
17 program, or semi-inpatient therapy in a day-clinic. N = 24 TUD participants receive qualified  
18 smoking cessation group therapy following study inclusion. The out-patient smoking cessation  
19 therapy lasts for 6 weeks with one group therapy session à 1.5 hours per week. Individuals  
20 randomly allocated to the experimental group (24 individuals with AUD and 24 individuals  
21 with TUD) will receive CB-CRT for 1.5 hours twice a week for 6 weeks in addition to the  
22 standard treatment.

### 23 24 25 **Patient and public involvement**

26  
27 Individuals currently or formerly affected by either AUD or TUD were involved in the  
28 development of the study design including outcome measurements. Two research colleagues  
29 with insight from both perspectives were consulted and supported the development and  
30 implementation of the study. The chess-based cognitive remediation training was utilized in  
31 practice as described in the following including patients with diverse mental disorders. It  
32 therefore grew in correspondence with the patients' feedback. In addition, a pilot study with  
33 patient from an addiction rehabilitation center resulted in good to very good patient ratings  
34 regarding helpfulness and acceptance. We will disseminate study results to interested  
35 patients. Also all study participants will always be able to discuss open questions throughout  
36 the process of the training with qualified research staff and they will receive feedback  
37  
38  
39  
40  
41  
42  
43  
44  
45  
46  
47  
48  
49  
50  
51  
52  
53  
54  
55  
56  
57  
58  
59  
60

1  
2  
3 regarding the goals of the training and study and the background of the methods used for  
4 training and study examination.  
5

6  
7 No patients are involved in the recruitment procedure and conduct of the study and the  
8 burden of study participation was not assessed beforehand by patients.  
9

### 10 11 12 **Examination procedure**

13  
14 Eligible participants between 18 and 65 years will be informed about the purpose and all  
15 aspects of the study. They will be provided with written study information according to the  
16 ethics regulations. Participants will be able to ask questions regarding the study. Afterwards,  
17 written informed consent will be obtained. All participants can withdraw their consent at any  
18 time. Then, study exclusion- and inclusion criteria will be examined. To do so, a structured  
19 clinical interview (SCID-5-CV)[47] will be performed to assess a possible history of lifetime and  
20 current mental disorders. Individuals with a diagnosis of severe mental or personality  
21 disorders will be excluded, e.g., lifetime bipolar disorder or schizophrenia or current severe  
22 depression, post-traumatic stress disorder. Current mild or moderate mental or personality  
23 disorders, such as mild anxiety-, adaptation, personality disorders or depression, will be  
24 tolerated. Individuals with AUD are included in the study after controlled abstinence for at  
25 least 72 hours, including completion of medically supervised detoxification (treatment of  
26 withdrawal symptoms with short-acting benzodiazepines or chlormethiazole must have been  
27 completed for at least three days). Individuals with TUD will be included following the  
28 intention to quit smoking. A detailed list of all inclusion and exclusion criteria regarding AUD  
29 and TUD are shown in table 1. Following study inclusion, participants will be randomly  
30 assigned to either the control or experimental group.  
31  
32

33  
34 At the baseline examination appointment (T1) all participants will provide sociodemographic  
35 information and perform several neuropsychological tasks. An fMRI assessment will then take  
36 place. Participants will also fill out several questionnaires directly after the baseline  
37 assessment. After the 6 week long intervention period - either standard treatment alone or  
38 with CB-CRT as therapy add-on - a second examination appointment (T2) takes place. All  
39 participants will perform the same neuropsychological tasks again and the same fMRI  
40 assessment as conducted in T1 will take place. Participants will also fill out the same  
41 questionnaires as for T1. During a follow-up period of 12 weeks following the intervention,  
42 three telephone interviews (FU1, FU2, T3) will be conducted once a month. Instances of  
43  
44  
45  
46  
47  
48  
49  
50  
51  
52  
53  
54  
55  
56  
57  
58  
59  
60

1  
2  
3 relapse and amount of tobacco or alcohol consumption will be documented. Beyond this, the  
4 same questionnaires as for T1 and T2 will be completed.

5  
6  
7 Please see figure 1 for a detailed description of the study procedure and tables 2 and 3 for list  
8 of assessments used, including fMRI and neuropsychological paradigms, and questionnaires.  
9

### 10 11 12 **Standard Treatment**

13  
14 All study participants (TUD and AUD) will follow their respective treatment as usual (TAU).  
15  
16 With regards to TUD, a qualified smoking cessation group therapy with one therapy session  
17 per week (90 minutes) will be held by a trained and certified psychologist. This intervention is  
18 strongly recommended in the latest version of the S3 guidelines for tobacco use disorder[48].  
19 A superior effect on smoking cessation was observed following group therapy compared to,  
20 e.g., self-help or less intense interventions[49]. During the qualified smoking cessation group  
21 therapy, interventions following a cognitive-behavioural psychotherapy approach will be  
22 applied[50]. Study participants with AUD will follow the respective in-house or day-clinic  
23 therapeutic programme, as recommended by the respective S3 guidelines for alcohol use  
24 disorder[51]. This standard treatment includes medical and psychological interventions.  
25  
26  
27  
28  
29  
30  
31  
32  
33

### 34 **Chess-based cognitive remediation training**

35  
36 The planned CB-CRT „Entrenamiento cognitivo a través del ajedrez (ECAM, „Cognitive training  
37 through chess“, <https://ajedrezmagic.es/el-entrenamiento-cognitivo-a-traves-del-ajedrez/>)  
38 consists of a battery of tasks and was developed by one of the co-authors (J. A. M.). The  
39 training battery, which is administered in a group setting using mainly a chess demonstration  
40 board, is designed to strengthen cognitive functioning in specific domains such as selective  
41 attention (figure 2a), short-term memory (figure 2b), focal attention, pattern recognition,  
42 visuospatial abilities, planification skills (figure 2c), and inhibition. Participants do not need to  
43 know the game of chess. They will receive general information about the rules and strategies  
44 used for the corresponding training day. Overall, metacognitive abilities are trained as well,  
45 e.g., by giving psychoeducational information regarding different concepts of cognitive  
46 functioning, questioning, and identifying the underlying cognitive process, and enhancing the  
47 awareness of before mentioned aspects. Participants perform most of the specific tasks in  
48 front of the group and, for a social reinforcement effect, everyone will applaud the respective  
49 participant. Some of the tasks are conducted via paper-pencil. The training battery has been  
50  
51  
52  
53  
54  
55  
56  
57  
58  
59  
60

1  
2  
3 utilized for more than ten years by J.A.M and his colleagues as an add-on therapy for elderly  
4 individuals, children with autism and/or ADHD, individuals with Down Syndrome, mental and  
5 other disorders, and in adults with SUD. The scientific evaluation of the program is one of the  
6 goals of the current study.  
7  
8  
9

10  
11 In an unpublished pilot study in the rehabilitation clinic at Comunidad Terapéutica La  
12 Garrovilla, N = 26 patients with SUD (N = 22 male; substances: alcohol, opiates, cocaine,  
13 benzodiazepines, cannabis) were examined. CB-CRT was applied in a group setting twice a  
14 week for a duration of 90 minutes each. Cognitive functioning, especially in executive  
15 functions, was assessed at admission to the clinic at Comunidad Terapéutica La Garrovilla,  
16 Badajoz (Extremadura, Spain) and again after 14 weeks. The neuropsychological testing  
17 battery included measures of general processing speed (trail-making test A), cognitive  
18 flexibility (trail-making test B)[52], planning abilities (Tower of London)[53] and intelligence  
19 (Wechsler Adult Intelligence Scale, WAIS). Significant increases in performance were found  
20 after 14 weeks of treatment in general processing speed (trail-making test A;  $p = .001$ ),  
21 cognitive flexibility (trail-making test B;  $p = .013$ ), the Tower of London test ( $p = .001$ ) as well  
22 as in the WAIS measures for verbal comprehension (“similarities”,  $p = .019$ ) and for working  
23 memory (“letter-number sequencing”,  $p = .030$ , “digit span forward”,  $p = .044$ , “digit span  
24 backward”,  $p = .018$ , “digit span total”,  $p = .007$ ). Performance in the WAIS measures “coding”  
25 (processing speed) and “matrix reasoning” (perceptual reasoning) did not differ significantly.  
26  
27 In another sample of N = 15 patients receiving the chess-based add-on treatment for 3.5  
28 months, subjective satisfaction was evaluated. On scales ranging from 1 (very unsatisfied /  
29 very poor) to 4 (very satisfied / very good), 73% of the patients rated the overall program as  
30 very good (i. e. score of 4). 67% of the patients found the program very helpful in treating their  
31 SUD (score of 4), 27% found it helpful (score of 3). Further, when asked how the program  
32 influenced other domains being negatively affected by SUD before admission, 53% found the  
33 program very supportive (score of 4), 27% found it supportive (score of 3). Besides this, 87%  
34 reported that the program helped them to increase their memory capabilities, 93% stated a  
35 subjective increase in attention performance, and 93% reported an enhancement in decision-  
36 making.  
37  
38  
39  
40  
41  
42  
43  
44  
45  
46  
47  
48  
49  
50  
51  
52  
53  
54  
55

### 56 ***Self-rating Questionnaires***

57  
58  
59  
60

1  
2  
3 Self-rating questionnaires will be administered to address factors related to, e.g.,  
4 impulsiveness and inhibitory control, mood, psychosocial functioning, as well as substance  
5 consumption, or craving. Please see Table 2 for a detailed list.  
6  
7  
8  
9

### 10 ***Neuropsychological assessments***

11  
12 Tasks investigating components of working memory (Wechsler Memory Scale-3)[54],  
13 decision-making (Iowa Gambling Task)[55], as well as mental flexibility (Dimensional Change  
14 Card Sort)[56] and attentional capacity (d2-R Test of Attention)[57] will be administered.  
15  
16  
17  
18

### 19 ***fMRI assessments***

20  
21 During the fMRI scanner examination, study participants will perform a stop-signal task[58],  
22 alcohol- and tobacco based cue-reactivity tasks[59, 60], an N-back task[61] and a resting-state  
23 MRI. Scanning will be performed with a 3T whole-body tomograph (MAGNETOM Prisma;  
24 Siemens, Erlangen, Germany). T2\* weighted multi-band echo-planar images (mb-EPI) using a  
25 multi-band acceleration factor 6 will be acquired in a transversal orientation 20° clockwise to  
26 AC-PC-line covering the whole brain (TR = 869 ms, TE = 38 ms, 60 slices, slice thickness = 2.4  
27 mm, voxel size 2.4 × 2.4 × 2.4 mm, no inter-slice gap, field of view (FoV) = 210 mm, matrix size  
28 88 × 88, acquisition orientation T > C, interleaved slice order, acceleration factor slice = 6, flip  
29 angle = 58°, bandwidth = 1832 Hz/Px, prescan normalize, weak raw data filter, LeakBlock  
30 kernel, fat sat). This short TE and the 20° flip to AC-PC orientation is chosen to minimize  
31 susceptibility artefacts. Scanner sequences are provided by the Center for Magnetic  
32 Resonance Research (CMRR), University of Minnesota, Minneapolis, MN, USA  
33 (<https://www.cmrr.umn.edu/multiband/>)[62]. In addition, a T1-weighted 3D MPRAGE  
34 (Magnetization Prepared - RApid Gradient Echo) dataset consisting of 208 sagittal slices (slice  
35 thickness 1 mm, 1×1×1 mm voxel size, FOV 256 × 256 mm<sup>2</sup>, TR= 2000ms, TE = 2.01 ms, TI =  
36 800 ms, flip angle = 8°) will be acquired.  
37  
38  
39  
40  
41  
42  
43  
44  
45  
46  
47  
48  
49  
50  
51

### 52 ***Endpoints***

53  
54 endpoints are changes in neural alcohol and tobacco cue-reactivity[59, 60] (e.g., reduction in  
55 substance-related activation of striatal brain regions), neural correlates of inhibition (stop-  
56 signal task)[63] (e.g., increased dorsolateral prefrontal neural activation) and working memory  
57 (N-back task)[61] (e.g., increased inferior frontal neural activation), as well as functional  
58  
59  
60



connectivity within the salience network (SN; insula, anterior cingulate cortex) and executive control network (ECN; dorsolateral frontal and lateral posterior parietal cortices) using resting-state fMRI data. Also, working memory capacity (letter-number sequencing task of the Wechsler Memory Scale-3)[54], impulsivity (Barratt Impulsiveness Scale-15)[64, 65], mental flexibility (Dimensional Change Card Sort)[56], decision-making (Iowa Gambling Task)[55, 66] and attentional capacity (d2-R Test of Attention)[67], summarized as cognitive functioning, are endpoints of interest. Additionally, the duration until the first severe relapse (daily smoking of at least one cigarette at day, consumption of more than 48 grams (females) or 60 grams (males) of alcohol) during the follow-up periods and amount of substance consumption in case of a relapse as well as improvements in psychosocial functioning will be examined.

### ***Sample size calculation***

Using the software package G\*Power[68] the sample size calculation was conducted for the main primary outcomes, i.e., neurobiological correlates underlying adaptations following the CB-CRT, where we expected a minimum effect size of  $f = 0.2$  for all constructs (ANOVA with repeated measures, within- and between subject factors and interactions). In this case, ideal sample coverage would be 24 individuals per group (at 80% power, alpha-level 5%).

### ***Data analysis plan***

To analyse psychometric and neuropsychological data, SPSS (Statistics for Windows, Version 25.0. IBM Corp., Armonk, NY) will be used. The various dependent variables will be evaluated using multivariate analyses of variance with repeated measures. To counteract possible group differences at baseline, a percentage in change (divide by T1 values) or variable values at T1 can be incorporated in subsequent statistical analyses as a covariate. In addition, linear regression models will be calculated to examine the influence of confounding variables (for example, severity of tobacco or alcohol dependence) on the observed change in dependent variables as described previously (e.g., craving, task performance, psychosocial well-being). Cox-regression analyses, including, e.g., brain activation in the dorsolateral prefrontal or inferior frontal regions during inhibition and executive functioning, or the ventral striatum during cue reactivity tasks as predictors, will be conducted to examine the association with relapse. To analyse the fMRI data, SPM12 (Wellcome Department of Cognitive Neurology, London, UK) running under Matlab will be used. The pre-processing pipeline will include



1  
2  
3 motion correction, normalization to the Montreal Neurological Institute (MNI) template, and  
4 a spatial smoothing with Gaussian kernel of 8 mm full width at half maximum (FWHM) will be  
5 conducted. The pre-processed data will then be used for first- and second-level analyses. On  
6  
7 the first level (within-subject), neural activation associated with task conditions (contrasts)  
8  
9 will be modelled via a convolution with a canonical hemodynamic response function (HFR)  
10 following a general linear model (GLM). A high-pass filter to remove low-frequency  
11 components of fMRI time-series will be used. Depending on the fMRI tasks, specific contrasts  
12 regarding task conditions will be modelled as described in the above cited literature. On the  
13  
14 second level (between-subject) and regarding the effects of group and time, paired t-tests  
15 (e.g., pre vs. post intervention within one group) and full factorial models will be used.  
16  
17 Additionally, regression models including clinical variables, such as severity of TUD or AUD,  
18 will be calculated. To control for multiple statistical testing, we will use established correction  
19 procedures, e.g., whole brain family-wise error correction (FWE) for fMRI analyses or  
20 Bonferroni correction for other statistical analyses.  
21  
22  
23  
24  
25  
26  
27  
28  
29

## 30 **Hypotheses**

### 31 *Primary hypotheses*

- 32 1. CB-CRT improves aberrant neural alcohol cue-reactivity (measured by alcohol and  
33 tobacco cue-reactivity fMRI tasks) in AUD/TUD in comparison to standard treatment  
34 alone
- 35 2. CB-CRT improves neuronal aberrations present when executing cognitive tasks  
36 (measured by N-back and stop-signal fMRI task) in individuals with AUD/TUD in  
37 comparison to standard treatment alone.
- 38 3. CB-CRT decreases functional connectivity within the salience network in individuals  
39 with AUD/TUD in comparison to standard treatment alone.
- 40 4. CB-CRT decreases functional connectivity within the executive control network in  
41 individuals with AUD/TUD in comparison to standard treatment alone.
- 42 5. CB-CRT improves cognitive functioning (measured by neuropsychological tasks) in  
43 AUD/TUD individuals in comparison to standard treatment alone.
- 44 6. CB-CRT improves psychosocial functioning (measured by, e.g., HSWBS, SWLS) in  
45 AUD/TUD individuals in comparison to standard treatment alone. CB-CRT influences  
46  
47  
48  
49  
50  
51  
52  
53  
54  
55  
56  
57  
58  
59  
60

1  
2  
3 the treatment process, e.g., time to first severe relapse, for AUD/TUD individuals  
4  
5 positively in comparison to standard treatment alone.  
6

### 7 *Secondary hypotheses*

- 8 1. CB-CRT might be more efficacious in individuals with impaired cognitive functioning,  
9 low self-esteem, self-efficacy, and social support.  
10
- 11 2. Chess as a three-week add-on therapy influences the treatment process, e.g., time to  
12 first severe relapse for AUD/TUD individuals moderated and mediated by cognitive,  
13 affective, and psychosocial factors.  
14  
15  
16  
17  
18  
19

### 20 **Discussion**

21 The here presented study aims to examine the effect of CB-CRT as treatment add-on on  
22 neurobiological processes but also neuropsychological and psychosocial functioning known to  
23 contribute to the development and maintenance of AUD and TUD. The effect of CB-CRT might  
24 also results in longer times of abstinence or reduced substance consumption. If CB-CRT as  
25 therapy add-on, as examined in this comprehensive study, shows to be more effective than  
26 standard treatment alone, this intervention might help to improve health behaviour in  
27 affected individuals.  
28

29 Limitations with respect to the interpretability of the data might derive from the study design.  
30 We aim to examine the superior effect of CB-CRT compared to treatment as usual in therapy  
31 outcomes that might rely on neurobiological alterations following this training. As postulated  
32 by Sala and Gobet (69) a third, active control group might be needed to ultimately evaluate  
33 the chess-specific mechanisms and outcomes. Therefore and in case of successfully  
34 demonstrating a superior effect of our CB-CRT, a subsequent study might be needed to  
35 address this question. Further, even in light of our future results confirming a superior effect  
36 of CB-CRT as therapy add-on on neurobiological and neuropsychological processes, these  
37 improvements might to translate to longer abstinence or a reduction in the amount of  
38 substance consumption. Previously, this has been demonstrated in AUD: Even though an  
39 improvement in working memory functioning has been observed following an active working-  
40 memory training in patients with AUD, heavy drinking and neuropsychological functioning in  
41 other domains remained unchanged[39].  
42  
43  
44  
45  
46  
47  
48  
49  
50  
51  
52  
53  
54  
55  
56  
57

58 Since the described study includes a cognitive remediation training that exceeds merely  
59 training individual domains, we hope to counteract limitations of previous studies. Including  
60

1  
2  
3 social (training in the group) and metacognitive aspects, the CB-CRT might generalize from  
4 altering neurobiological processing to behavioural changes, i.e. substance consumption.  
5  
6  
7

### 8 **Ethics and dissemination**

9  
10 The study was approved by the local Ethics Committee of the Medical Faculty Mannheim at  
11 the University of Heidelberg, Germany (reference number 2017-647N-MA). Before study  
12 inclusion and after a detailed explanation of all procedures, all participants will provide written  
13 informed consent. The study was registered in the Clinical Trials Register (trial identifier:  
14 NCT04057534) on December 8th, 2019. The study results will be disseminated by peer-review  
15 publications and conference presentations. Open-access publication is planned for all peer-  
16 reviewed publications. All participants are offered to receive a print of the final, published  
17 version of peer-reviewed publications. For protection of personal rights, and due to the  
18 sensitivity of the clinical and neuroimaging data, data will not be made publicly available. Upon  
19 direct request by other researchers and in mutual agreements (e.g., regarding data  
20 protection), anonymized data can be made available. Upon request, analysis procedures and  
21 codes will be shared with other researchers.  
22  
23  
24  
25  
26  
27  
28  
29  
30  
31  
32  
33  
34  
35

### 36 **Risks associated with participation**

37 Participants will be asked several questions regarding their substance consumption, mood,  
38 quality of life. They will additionally perform neuropsychological and fMRI tasks. Both excerpts  
39 a strain on the participants in terms of time and effort. Further, it may cause emotional  
40 discomfort in some participants. To counteract these possible negative consequences of study  
41 participations, the research team, also consisting of psychologists and psychotherapists in  
42 training, will regularly check if participants and evaluate their (dis)comfort. Contact to  
43 qualified clinicians will be made possible in case of severe emotional discomfort. Due to the  
44 length of the study appointments, we will offer participants the option to flexibly answer most  
45 of the questionnaires at home.  
46  
47  
48  
49  
50  
51  
52  
53  
54  
55  
56  
57

### 58 **Funding**

1  
2  
3 This study is supported by a grant from the Deutsche Forschungsgemeinschaft (Grant ID  
4 421888313). The Deutsche Forschungsgemeinschaft was not involved in the planning of the  
5 study, and will not be involved in data collection, analyses or publication procedures.  
6  
7  
8  
9  
10

### 11 **Availability of data and materials**

12  
13  
14 For protection of personal rights, and due to the sensitivity of the clinical and neuroimaging  
15 data, data will not be made publicly available. Upon direct request by other researchers and  
16 in mutual agreements (e.g., regarding data protection), anonymized data can be made  
17 available. Upon request, analysis procedures and codes will be shared with other researchers.  
18  
19  
20  
21  
22  
23  
24

### 25 **Acknowledgements**

26  
27  
28 We would like to thank Carmen Gaitan Coronado for their training in ECAM and their help in  
29 creating the therapy manual and Alycia Lee for English editing. We gratefully acknowledge the  
30 support of our colleagues, formerly affected by AUD or TUD, and our study participants  
31 regarding the planning, implementation and conduct of the study.  
32  
33  
34  
35  
36  
37  
38

### 39 **Authors contributions**

40  
41  
42 SVK designed the study. TW, GL, JH helped with designing the study. JAM developed the chess-  
43 based remediation training ECAM. GL, JH, RS, AJR, DK, AW, SVK, SG adapted the training. SG,  
44 GL, and SVK wrote the manuscript. All authors read and approved the manuscript.  
45  
46  
47  
48  
49

### 50 **Conflicts of interest**

51  
52  
53 All authors have no conflict of interest to declare.  
54  
55  
56  
57  
58  
59  
60

1  
2  
3  
4  
5  
6  
7  
8  
9  
10  
11  
12  
13  
14  
15  
16  
17  
18  
19  
20  
21  
22  
23  
24  
25  
26  
27  
28  
29  
30  
31  
32  
33  
34  
35  
36  
37  
38  
39  
40  
41  
42  
43  
44  
45  
46  
47  
48  
49  
50  
51  
52  
53  
54  
55  
56  
57  
58  
59  
60

For peer review only

## Tables

Table 1: Inclusion and exclusion criteria of the overall study sample. Specific criteria for AUD and TUD are highlighted.

| Inclusion criteria                                                                                                                                                                                                           |                                                                                                                                                               | Exclusion criteria                                                                                                                                                                                                                                                                                                                                                                                                                                                                                                                                                                                 |                                                                                                                                                                                                                                                                                                                |
|------------------------------------------------------------------------------------------------------------------------------------------------------------------------------------------------------------------------------|---------------------------------------------------------------------------------------------------------------------------------------------------------------|----------------------------------------------------------------------------------------------------------------------------------------------------------------------------------------------------------------------------------------------------------------------------------------------------------------------------------------------------------------------------------------------------------------------------------------------------------------------------------------------------------------------------------------------------------------------------------------------------|----------------------------------------------------------------------------------------------------------------------------------------------------------------------------------------------------------------------------------------------------------------------------------------------------------------|
| <ul style="list-style-type: none"> <li>Age between 18 and 65 years</li> <li>Normal or corrected to normal vision</li> <li>Signed written informed consent</li> <li>Signed consent for data security</li> </ul>               |                                                                                                                                                               | <ul style="list-style-type: none"> <li>Pregnancy</li> <li>Positive alcohol test</li> <li>Common exclusion criteria for MRI (e.g., metal, claustrophobia, epilepsy, adiposity)</li> <li>Suicidality</li> <li>Severe cognitive impairments (e.g., dementia)</li> <li>Severe physical illness</li> <li>Neurological disorders, history of brain injury</li> <li>Therapy with methylphenidate within the last 8 weeks</li> <li>Other mental disorders, except for mild or moderate anxiety-, adaptation-, post-traumatic stress-, personality-, attention deficit / hyperactivity disorders</li> </ul> |                                                                                                                                                                                                                                                                                                                |
| AUD                                                                                                                                                                                                                          | TUD                                                                                                                                                           | AUD                                                                                                                                                                                                                                                                                                                                                                                                                                                                                                                                                                                                | TUD                                                                                                                                                                                                                                                                                                            |
| <ul style="list-style-type: none"> <li>AUD according to DSM-5 (more than 3 fulfilled criteria)</li> <li>Currently in therapy for AUD (in-patient or outpatient therapy)</li> <li>Abstinence from alcohol &gt; 72h</li> </ul> | <ul style="list-style-type: none"> <li>TUD according to DSM-5 (more than 3 fulfilled criteria)</li> <li>Participation in smoking cessation therapy</li> </ul> | <ul style="list-style-type: none"> <li>Other Axis I mental disorder except for mild, moderate or remitted depression, other substance use disorders if AUD is still the main diagnosis</li> <li>Severe withdrawal symptoms (CIWA-Ar &gt; 7; Sullivan et al. 1989)</li> <li>Psychotropic medication within the last 14 days except for antidepressants or soporific and intake of medication for treating withdrawal effects until 3 days prior to study participation</li> </ul>                                                                                                                   | <ul style="list-style-type: none"> <li>Other Axis I mental disorder except for mild or remitted depression, other mild substance use disorders (i.e., max. of 3 fulfilled DSM-5 criteria in the last 12 months)</li> <li>Psychotropic medication within the last 14 days except for antidepressants</li> </ul> |

**Note:** AUD = Alcohol use disorder; TUD = Tobacco use disorder; DSM = Diagnostic and Statistical Manual of Mental Disorders; MRI = Magnetic resonance imaging

Table 2: Self-rating questionnaires.

| Questionnaire                                                     | Short term | Measurement Aim                                     | Reference |
|-------------------------------------------------------------------|------------|-----------------------------------------------------|-----------|
| Goal attainment scale                                             | GAS        | Abstinence-related goals                            | [70]      |
| Rosenberg Scale                                                   |            | Self-esteem                                         | [71]      |
| General Self-Efficacy Scale                                       | GSE        | Self-efficacy                                       | [72]      |
| Perceived Social Support Questionnaire                            | F-SozU     | Perceived social support                            | [73]      |
| Habitual Subjective Well-Being Questionnaire                      | SWLS       | Psychological well-being                            | [74]      |
| Satisfaction with Life Scale                                      | SWLS       | Life satisfaction                                   | [75]      |
| Positive and Negative Affect Schedule                             | PANAS      | Affect                                              | [76]      |
| State-Trait Anxiety Inventory                                     |            | Anxiety                                             | [77]      |
|                                                                   | STAI X2    | Personality trait                                   |           |
|                                                                   | STAI X1    | Temporary state                                     |           |
| Beck Depression Inventory II                                      | BDI II     | Depression                                          | [78, 79]  |
| Percived Stress Scale                                             | PSS        | Perceived stress                                    | [80]      |
| Barratt Impulsiveness Scale                                       | BIS-15     | Impulsivity                                         | [64, 65]  |
| Adult ADHD Self-Report Scale-V1.1<br>Symptoms Checklist           | ASRS-V1.1  | ADHD symptoms                                       | [81]      |
| ADHD Self-Rating Scale                                            | ADHD-SB    | ADHD symptoms                                       | [82]      |
| Creature of Habit Scale                                           | COHS       | Automatic behaviour                                 | [83]      |
| Self-Report Habit Index                                           | SRHI       | Substance-related habits                            | [84]      |
| Fagerström Test for Nicotine<br>Dependence                        | FTND       | Intensity of physical nicotine<br>dependence        | [85]      |
| Alcohol Use Disorder Identification Test                          | AUDIT      | Screening for alcohol use<br>disorder               | [86]      |
| Clinical Institute Withdrawal<br>Assessment for Alcohol<br>Form90 | CIWA-Ar    | Alcohol withdrawal symptoms                         | [87]      |
|                                                                   |            | Alcohol or nicotine<br>consumption                  | [88]      |
| Visual Analog Craving Scales                                      | VACS       | Alcohol or nicotine craving                         | [89]      |
| Obsessive Compulsive Drinking Scale                               | OCDS-G     | Thoughts about alcohol and<br>drinking behaviour    | [90]      |
| Alcohol Craving Questionnaire                                     | ACQ-SF-R   | Acute alcohol craving                               | [91]      |
| Craving Automated Scale for Alcohol                               | CAS-A      | Alcohol craving and automated<br>drinking behaviour | [92]      |
| Alcohol Urge Questionnaire                                        | AUQ        | Alcohol urges                                       | [93]      |
| Alcohol Dependence Scale                                          | ADS        | Severity of alcohol dependence                      | [94]      |
| Questionnaire on Smoking Urges                                    | QSU        | Smoking urges                                       | [95]      |
| Craving Automated Scale for Cigarette<br>Smoking                  | CAS-CS     | Nicotine craving and<br>automated smoking behaviour | [60]      |
| Obsessive Compulsive Smoking Scale                                | OCSS       | Thoughts about tobacco and<br>smoking behaviour     | [96]      |
| Smoking Consequences Questionnaire<br>for Adults                  | SCQ-A      | Smoking outcome expectancies                        | [97]      |
| Wisconsin Smoking Withdrawal Scale                                | WSWS       | Nicotine withdrawal symptoms                        | [98]      |

**Note:** ADHD = Attention Deficit Hyperactivity Disorder.

Table 3: Schedule of measurement during study participation.

| Measurement time point                         | S        |          | T1       |          | T2       |          | FU1      |          | FU2      |          | T3       |          |
|------------------------------------------------|----------|----------|----------|----------|----------|----------|----------|----------|----------|----------|----------|----------|
| Baseline                                       | T        | A        | T        | A        | T        | A        | T        | A        | T        | A        | T        | A        |
| Demographic information                        | x        | x        | x        | x        |          |          |          |          |          |          |          |          |
| Current medication*                            | x        | x        | x        | x        | x        | x        |          |          |          |          | x        | x        |
| Current somatic or mental conditions*          | x        | x        | x        | x        | x        | x        |          |          |          |          | x        | x        |
| Structured Clinical Interview (SCID-5-CV)      |          |          | x        | x        |          |          |          |          |          |          |          |          |
| Smoking history                                |          |          | x        | x        |          |          |          |          |          |          |          |          |
| Current smoking behavior*                      |          |          |          |          | x        |          | x        |          | x        |          | x        | x        |
| Smoking Assessment Interview                   |          |          | x        |          | x        |          |          |          |          |          | x        |          |
| (Current) drinking behavior*                   |          | x        | x        |          | x        |          | x        |          | x        |          | x        | x        |
| CIWA-Ar                                        |          |          | x        |          | x        |          |          |          |          |          |          |          |
| Current drug use*                              | x        | x        |          |          |          |          |          |          |          |          | x        | x        |
| Urine pregnancy and drugs screening            |          |          | x        | x        | x        | x        |          |          |          |          |          |          |
| Breath alcohol test                            |          |          | x        | x        | x        | x        |          |          |          |          |          |          |
| Breath carbon monoxide test                    |          |          | x        |          | x        |          |          |          |          |          |          |          |
| Goal attainment scaling                        |          |          | x        | x        | x        | x        |          |          |          |          |          |          |
| <b>Neuropsychology</b>                         | <b>T</b> | <b>A</b> |
| MWT-B                                          |          |          | x        |          |          |          |          |          |          |          |          |          |
| LNS-Task                                       |          |          | x        |          | x        |          |          |          |          |          |          |          |
| D2-R                                           |          |          | x        | x        | x        | x        |          |          |          |          |          |          |
| IGT                                            |          |          | x        | x        | x        | x        |          |          |          |          |          |          |
| DCCS                                           |          |          | x        | x        | x        | x        |          |          |          |          |          |          |
| <b>Magnetic resonance imaging</b>              | <b>T</b> | <b>A</b> |
| Field-Map                                      |          |          | x        | x        | x        | x        |          |          |          |          |          |          |
| Resting-State                                  |          |          | x        | x        | x        | x        |          |          |          |          |          |          |
| NICUETINE                                      |          |          | x        | x        | x        | x        |          |          |          |          |          |          |
| N-Back                                         |          |          | x        | x        | x        | x        |          |          |          |          |          |          |
| SST                                            |          |          | x        | x        | x        | x        |          |          |          |          |          |          |
| ALCUE                                          |          |          | x        | x        | x        | x        |          |          |          |          |          |          |
| MPRAGE                                         |          |          | x        | x        | x        | x        |          |          |          |          |          |          |
| <b>General questionnaires</b>                  | <b>T</b> | <b>A</b> |
| PANAS                                          |          |          | x        | x        | x        | x        | x        | x        | x        | x        | x        | x        |
| HSWBS                                          |          |          | x        | x        | x        | x        |          |          |          |          |          |          |
| GSE                                            |          |          | x        | x        |          |          |          |          |          |          |          |          |
| Rosenberg                                      |          |          | x        | x        |          |          |          |          |          |          |          |          |
| SWLS                                           |          |          | x        | x        | x        | x        |          |          |          |          | x        | x        |
| FSozU                                          |          |          | x        | x        |          |          |          |          |          |          |          |          |
| <b>Questionnaires - depression and anxiety</b> | <b>T</b> | <b>A</b> |
| BDI II                                         |          |          | x        | x        | x        | x        |          |          |          |          | x        | x        |
| PSS                                            |          |          | x        | x        | x        | x        |          |          |          |          | x        | x        |
| STAI (X1)                                      |          |          | x        | x        | x        | x        |          |          |          |          | x        | x        |
| STAI (X2)                                      |          |          | x        | x        |          |          |          |          |          |          |          |          |
| <b>Questionnaires – impulsivity and ADHD</b>   | <b>T</b> | <b>A</b> |
| ASRS-v1.1                                      |          |          | x        | x        | x        | x        |          |          |          |          |          |          |
| ADHS-SB                                        |          |          | x        |          | x        |          |          |          |          |          |          |          |
| BIS-15                                         |          |          | x        | x        | x        | x        |          |          |          |          | x        | x        |
| COHS                                           |          |          | x        | x        |          |          |          |          |          |          |          |          |
| <b>Questionnaires - alcohol</b>                | <b>T</b> | <b>A</b> |
| ACQ-SF-R                                       |          |          | x        |          | x        |          |          |          |          |          |          | x        |
| ADS                                            |          |          | x        |          |          |          |          |          |          |          |          |          |
| AUDIT                                          | x        | x        |          |          |          |          |          |          |          |          |          |          |
| AUQ                                            |          |          | x        |          | x        |          | x        |          | x        |          |          |          |
| CAS-A                                          |          |          | x        |          | x        |          |          |          |          |          |          | x        |



|                                 |  |          |          |          |          |          |          |          |          |          |          |
|---------------------------------|--|----------|----------|----------|----------|----------|----------|----------|----------|----------|----------|
| OCDS-G                          |  |          | x        |          | x        |          | x        |          | x        |          |          |
| SRHI (alcohol)                  |  |          | x        |          | x        |          |          |          |          |          | x        |
| VACS for MRI (alcohol)          |  |          | x        | x        | x        | x        |          |          |          |          |          |
| <b>Questionnaires - tobacco</b> |  | <b>T</b> | <b>A</b> |
| OCSS                            |  |          |          | x        |          | x        |          | x        |          | x        |          |
| CAS-CS                          |  |          |          | x        | x        | x        |          |          |          |          | x        |
| QSU                             |  |          |          | x        |          | x        |          | x        |          | x        |          |
| SCQ-A                           |  |          |          | x        |          | x        |          |          |          |          | x        |
| WSWS                            |  |          |          | x        |          | x        |          |          |          |          | x        |
| SRHI (tobacco)                  |  |          |          | x        |          | x        |          |          |          |          | x        |
| FTND                            |  |          |          | x        | x        | x        |          |          |          |          | x        |
| VACS for MRI (tobacco)          |  |          |          | x        |          | x        |          |          |          |          |          |

**Note:** S = Screening measurement, T1 = baseline and MRI assessment, T2 = MRI assessment, FU = monthly follow-ups via telephone; T3 = final follow-up via telephone; T = Tobacco use disorder; A = Alcohol use disorder; \* self-report.

SCID = Structured Clinical Interview for DSM-5; AUDIT = Alcohol Use Disorder Identification Test; CIWA-AR = Clinical Institute Withdrawal Assessment; MWT-B = Multiple-choice vocabulary test (German version); LNS = Letter-Number-Sequencing (Wechsler-Memory Scale-3); D2-R = d2-R Test of Attention; IGT = Iowa Gambling Task; DCCS = Dimensional Change Card Sort; NICUETINE = fMRI tobacco cue-reactivity task; N-Back = N-back fMRI task; SST = Stop-Signal-Reaction-Time Task for fMRI; ALCUE = fMRI alcohol cue-reactivity task; MPRAGE = Magnetization Prepared - RApid Gradient Echo sequence; PANAS = Positive and Negative Affect Schedule; HSWBS = Habitual Subjective Well-Being Questionnaire; GSE = General Self-Efficacy Scale; Rosenberg = Rosenberg self-esteem scale; SWLS = Satisfaction with Life Scale; FSozU = Perceived Social Support Questionnaire; BDI-II = Beck-Depression Inventory; PSS = Perceived Stress Scale; STAI (X1,X2) = State / Trait Anxiety Inventory; ASRS-v1.1 = Adult ADHD Self-Report Scale Symptom Checklist, Part A; ADHS-SB = ADHD Self-rating Scale; BIS-15 = Barrett Impulsiveness Scale; COHS = Creature of Habit Scale; ACQ-SF-R = Alcohol Craving Questionnaire – short form revised; ADS = Alcohol Dependence Scale; AUQ = Alcohol Urge Questionnaire; CAS-A = Craving Automated Scale for Alcohol; OCDS-G = Obsessive Compulsive Drinking Scale - German; SRHI = Self-Report Habit Index (German translation, adapted for alcohol); VACS = Visual Analog Craving Scales for alcohol before and after fMRI for alcohol; OCSS = Obsessive Compulsive Smoking Scale; CAS-CS = Craving Automated Scale for Cigarette Smoking; QSU = Questionnaire on Smoking Urges; SCQ-A = Smoking Consequences Questionnaire for Adults; WSWS = Wisconsin Smoking Withdrawal Scale; SRHI = Self-Report Habit Index (tobacco); FTND = Fagerström Test for Nicotine Dependence; VACS = Visual Analog Craving Scales before and after fMRI for tobacco.

## Figure captions

**Figure 1: Study design.** Following a screening, all participants will undergo a baseline (T1) appointment with diagnostic interviews, questionnaires, and functional magnetic resonance imaging measurements. Participants with tobacco or alcohol use disorder will be randomly assigned to the control group or intervention group. All participants will receive their respective treatment as usual. The intervention groups will additionally receive chess-based cognitive remediation training (CB-CRT). After the 6 week long treatment as usual with/without CB-CRT (T2), the same measurements as for T1 will take place. During the follow-up period of 12 weeks, all participants will be contacted via telephone once a month.

**Figure 2: Examples of the chess-based cognitive remediation training. 2a: Selective attention.** Participants are asked to count the number of white knights on white squares (right answer: 5, squares: b1, b7, c6, d7, f1). During the training, participants receive 6 boards within a maximum of three minutes. **2b: Short term memory.** Participants are focused on the board and see the position for a few seconds up to one minute. Afterwards, the instructor asks the participants to reconstruct the position. Participants are asked to go to the front of the group and rebuild the position. **2c: Executive functions, planification skills.** Participants must find out the shortest route the knight can go to capture the pawn. The knight must not stop on any square controlled by the rooks. The participant is asked to announce the number of moves before showing them on the board (correct answer: 4 moves – g5-e6-c7-b5-c3 or g5-e6-d4-b5-c3).

1  
2  
3  
4  
5  
6  
7  
8  
9  
10  
11  
12  
13  
14  
15  
16  
17  
18  
19  
20  
21  
22  
23  
24  
25  
26  
27  
28  
29  
30  
31  
32  
33  
34  
35  
36  
37  
38  
39  
40  
41  
42  
43  
44  
45  
46  
47  
48  
49  
50  
51  
52  
53  
54  
55  
56  
57  
58  
59  
60

For peer review only

## References

- 1 Peacock A, Leung J, Larney S, et al. Global statistics on alcohol, tobacco and illicit drug use: 2017 status report. *Addiction*. 2018;113(10):1905-26.
- 2 Atzendorf J, Rauschert C, Seitz NN, Lochbuhler K, Kraus L. The Use of Alcohol, Tobacco, Illegal Drugs and Medicines. *Dtsch Arztebl Int*. 2019;116(35-36):577-84.
- 3 Konnopka A, Konig HH. Direct and indirect costs attributable to alcohol consumption in Germany. *Pharmacoeconomics*. 2007;25(7):605-18.
- 4 Neubauer S, Welte R, Beiche A, Koenig HH, Buesch K, Leidl R. Mortality, morbidity and costs attributable to smoking in Germany: update and a 10-year comparison. *Tob Control*. 2006;15(6):464-71.
- 5 Newcomb PA, Carbone PP. The health consequences of smoking. *Cancer. Med Clin North Am*. 1992;76(2):305-31.
- 6 Moos RH, Moos BS. Rates and predictors of relapse after natural and treated remission from alcohol use disorders. *Addiction*. 2006;101(2):212-22.
- 7 Miller WR, Walters ST, Bennett ME. How effective is alcoholism treatment in the United States? *Journal of studies on alcohol*. 2001;62(2):211-20.
- 8 Anton RF, O'Malley SS, Ciraulo DA, et al. Combined pharmacotherapies and behavioral interventions for alcohol dependence: the COMBINE study: a randomized controlled trial. *Jama*. 2006;295(17):2003-17.
- 9 Hughes JR, Peters EN, Naud S. Relapse to smoking after 1 year of abstinence: a meta-analysis. *Addict Behav*. 2008;33(12):1516-20.
- 10 von der Goltz C, Kiefer F. Learning and memory in the aetiopathogenesis of addiction: future implications for therapy? *Eur Arch Psychiatry Clin Neurosci*. 2009;259 Suppl 2:S183-7.
- 11 West R. Tobacco smoking: Health impact, prevalence, correlates and interventions. *Psychology & Health*. 2017;32(8):1018-36.
- 12 Sinha R. New findings on biological factors predicting addiction relapse vulnerability. *Current psychiatry reports*. 2011;13(5):398-405.
- 13 Nebe S, Kroemer NB, Schad DJ, et al. No association of goal-directed and habitual control with alcohol consumption in young adults. *Addiction Biology*. 2018;23(1):379-93.
- 14 Hogarth L, Lam-Cassettari C, Pacitti H, et al. Intact goal-directed control in treatment-seeking drug users indexed by outcome-devaluation and Pavlovian to instrumental transfer: critique of habit theory. *European Journal of Neuroscience*. 2019;50(3):2513-25.
- 15 Hogarth L. Addiction is driven by excessive goal-directed drug choice under negative affect: translational critique of habit and compulsion theory. *Neuropsychopharmacology*. 2020;45(5):720-35.
- 16 Garavan H, Hester R. The role of cognitive control in cocaine dependence. *Neuropsychol Rev*. 2007;17(3):337-45.
- 17 Sjoerds Z, de Wit S, van den Brink W, et al. Behavioral and neuroimaging evidence for overreliance on habit learning in alcohol-dependent patients. *Translational Psychiatry*. 2013;3(12):e337-e.
- 18 Ersche KD, Gillan CM, Jones PS, et al. Carrots and sticks fail to change behavior in cocaine addiction. *Science (New York, NY)*. 2016;352(6292):1468-71.
- 19 Sebold M, Deserno L, Nebe S, et al. Model-Based and Model-Free Decisions in Alcohol Dependence. *Neuropsychobiology*. 2014;70(2):122-31.
- 20 Bechara A. Decision making, impulse control and loss of willpower to resist drugs: a neurocognitive perspective. *Nat Neurosci*. 2005;8(11):1458-63.
- 21 Kirby KN, Petry NM. Heroin and cocaine abusers have higher discount rates for delayed rewards than alcoholics or non-drug-using controls. *Addiction*. 2004;99(4):461-71.
- 22 Yucel M, Lubman DI, Solowij N, Brewer WJ. Understanding drug addiction: a neuropsychological perspective. *Aust N Z J Psychiatry*. 2007;41(12):957-68.
- 23 Berkman ET, Falk EB, Lieberman MD. In the trenches of real-world self-control: neural correlates of breaking the link between craving and smoking. *Psychol Sci*. 2011;22(4):498-506.

- 1  
2  
3 24 Vollstädt-Klein S, Hermann D, Rabinstein J, et al. Increased activation of the ACC during a spatial  
4 working memory task in alcohol-dependence versus heavy social drinking. *Alcohol Clin Exp Res*.  
5 2010;34(5):771-6.  
6 25 Hamonniere T, Varescon I. Metacognitive beliefs in addictive behaviours: A systematic review.  
7 *Addictive behaviors*. 2018;85:51-63.  
8 26 Pintrich PR. The Role of Metacognitive Knowledge in Learning, Teaching, and Assessing. *Theory*  
9 *Into Practice*. 2002;41(4):219-25.  
10 27 Fleur DS, Bredeweg B, van den Bos W. Metacognition: ideas and insights from neuro- and  
11 educational sciences. *npj Science of Learning*. 2021;6(1):13.  
12 28 Cella M, Reeder C, Wykes T. Group cognitive remediation for schizophrenia: Exploring the role of  
13 therapist support and metacognition. *Psychol Psychother*. 2015.  
14 29 Wykes T, Spaulding WD. Thinking about the future cognitive remediation therapy--what works  
15 and could we do better? *Schizophr Bull*. 2011;37 Suppl 2:S80-90.  
16 30 Kiluk BD, Nich C, Babuscio T, Carroll KM. Quality versus quantity: acquisition of coping skills  
17 following computerized cognitive-behavioral therapy for substance use disorders. *Addiction*.  
18 2010;105(12):2120-7.  
19 31 Danner UN, Dingemans AE, Steinglass J. Cognitive remediation therapy for eating disorders. *Curr*  
20 *Opin Psychiatry*. 2015;28(6):468-72.  
21 32 Cella M, Reeder C, Wykes T. Lessons learnt? The importance of metacognition and its implications  
22 for Cognitive Remediation in schizophrenia. *Front Psychol*. 2015;6:1259.  
23 33 Cella M, Edwards C, Swan S, Elliot K, Reeder C, Wykes T. Exploring the effects of cognitive  
24 remediation on metacognition in people with schizophrenia. *Journal of Experimental*  
25 *Psychopathology*. 2019;10(2):2043808719826846.  
26 34 Montemagni C, Del Favero E, Riccardi C, et al. Effects of Cognitive Remediation on Cognition,  
27 Metacognition, and Social Cognition in Patients With Schizophrenia. *Front Psychiatry*.  
28 2021;12:649737.  
29 35 Bates ME, Buckman JF, Nguyen TT. A role for cognitive rehabilitation in increasing the  
30 effectiveness of treatment for alcohol use disorders. *Neuropsychol Rev*. 2013;23(1):27-47.  
31 36 Caetano T, Pinho MS, Ramadas E, Clara C, Areosa T, Dixe MDA. Cognitive Training Effectiveness on  
32 Memory, Executive Functioning, and Processing Speed in Individuals With Substance Use Disorders: A  
33 Systematic Review. *Front Psychol*. 2021;12:730165.  
34 37 Sofuoglu M, DeVito EE, Waters AJ, Carroll KM. Cognitive Function as a Transdiagnostic Treatment  
35 Target in Stimulant Use Disorders. *J Dual Diagn*. 2016;12(1):90-106.  
36 38 Nixon SJ, Lewis B. Cognitive training as a component of treatment of alcohol use disorder: A  
37 review. *Neuropsychology*. 2019;33(6):822-41.  
38 39 Khemiri L, Brynte C, Stunkel A, Klingberg T, Jayaram-Lindström N. Working Memory Training in  
39 Alcohol Use Disorder: A Randomized Controlled Trial. *Alcoholism, clinical and experimental research*.  
40 2019;43(1):135-46.  
41 40 Bernardin F, Maheut-Bosser A, Paille F. Cognitive Impairments in Alcohol-Dependent Subjects.  
42 *Frontiers in Psychiatry*. 2014;5(78).  
43 41 Spada MM, Caselli G, Wells A. A Triphasic Metacognitive Formulation of Problem Drinking. *Clinical*  
44 *Psychology & Psychotherapy*. 2013;20(6):494-500.  
45 42 Blasco-Fontecilla H, Gonzalez-Perez M, Garcia-Lopez R, et al. Efficacy of chess training for the  
46 treatment of ADHD: A prospective, open label study. *Rev Psiquiatr Salud Ment*. 2015.  
47 43 Nour ElDaou BM, El-Shamieh SI. The Effect Of Playing Chess On The Concentration Of ADHD  
48 Students In The 2nd Cycle. *Procedia - Social and Behavioral Sciences*. 2015;192:638 – 43.  
49 44 Heinrichs RW, Zakzanis KK. Neurocognitive deficit in schizophrenia: a quantitative review of the  
50 evidence. *Neuropsychology*. 1998;12(3):426-45.  
51 45 Demily C, Cavezian C, Desmurget M, Berquand-Merle M, Chambon V, Franck N. The game of chess  
52 enhances cognitive abilities in schizophrenia. *Schizophr Res*. 2009;107(1):112-3.  
53 46 Sala G, Gobet F. Does chess instruction improve mathematical problem-solving ability? Two  
54 experimental studies with an active control group. *Learn Behav*. 2017;45(4):414-21.  
55  
56  
57  
58  
59  
60

- 1  
2  
3 47 First MB. Structured Clinical Interview for the DSM(SCID). In: Cautin RL, Lilienfeld SO, editors. The  
4 Encyclopedia of Clinical Psychology 2015. p. 1-6.
- 5 48 Batra A, Kiefer F, Andreas S, et al. S3-Leitlinie „Rauchen und Tabakabhängigkeit: Screening,  
6 Diagnostik und Behandlung“. *Sucht*. 2021.
- 7 49 Stead LF, Carroll AJ, Lancaster T. Group behaviour therapy programmes for smoking cessation.  
8 *Cochrane Database of Systematic Reviews*. 2017(3).
- 9 50 Batra A. Tabakentwöhnung. Buchkremer G, editor. 70565 Stuttgart: W. Kohlhammer Verlag; 2012.
- 10 51 Kiefer F, Batra A, Bischof G, et al. S3-Leitlinie „Screening, Diagnose und Behandlung  
11 alkoholbezogener Störungen“. *Sucht*. 2021.
- 12 52 Tombaugh TN. Trail Making Test A and B: Normative data stratified by age and education.  
13 *Archives of Clinical Neuropsychology*. 2004;19(2):203-14.
- 14 53 Berg WK, Byrd DL. The Tower of London spatial problem-solving task: Enhancing clinical and  
15 research implementation. *Journal of Clinical and Experimental Neuropsychology*. 2002;24(5):586-604.
- 16 54 Kent P. The Evolution of the Wechsler Memory Scale: A Selective Review. *Appl Neuropsychol*  
17 *Adult*. 2013;20(4):277-91.
- 18 55 Bechara A, Damasio AR, Damasio H, Anderson SW. Insensitivity to future consequences following  
19 damage to human prefrontal cortex. *Cognition*. 1994;50(1-3):7-15.
- 20 56 Zelazo PD, Anderson JE, Richler J, et al. NIH Toolbox Cognition Battery (CB): validation of executive  
21 function measures in adults. *J Int Neuropsychol Soc*. 2014;20(6):620-9.
- 22 57 Brickenkamp R. Aufmerksamkeits-Belastungs-Test. 9., überarbeitete und neu normierte Auflage  
23 [d2 Test of attention, 9th revised edn.]. Hogrefe V, editor. Göttingen 2002.
- 24 58 Whelan R, Conrod PJ, Poline JB, et al. Adolescent impulsivity phenotypes characterized by distinct  
25 brain networks. *Nat Neurosci*. 2012;15(6):920-5.
- 26 59 Vollstädt-Klein S, Loeber S, Kirsch M, et al. Effects of Cue-Exposure Treatment on Neural Cue  
27 Reactivity in Alcohol Dependence: A Randomized Trial. *Biol Psychiatry*. 2011;69(11):1060-6.
- 28 60 Vollstädt-Klein S, Kobiella A, Buhler M, et al. Severity of dependence modulates smokers' neuronal  
29 cue reactivity and cigarette craving elicited by tobacco advertisement. *Addiction biology*.  
30 2011;16(1):166-75.
- 31 61 Charlet K, Beck A, Jorde A, et al. Increased neural activity during high working memory load  
32 predicts low relapse risk in alcohol dependence. *Addiction biology*. 2014;19(3):402-14.
- 33 62 Xu J, Moeller S, Auerbach EJ, et al. Evaluation of slice accelerations using multiband echo planar  
34 imaging at 3 T. *NeuroImage*. 2013;83:991-1001.
- 35 63 Whelan R, Conrod PJ, Poline JB, et al. Adolescent impulsivity phenotypes characterized by distinct  
36 brain networks. *Nat Neurosci*. 2012;15(6):920-5.
- 37 64 Meule A, Vögele C, Kübler A. Psychometrische Evaluation der deutschen Barratt Impulsiveness  
38 Scale – Kurzversion (BIS-15). *Diagnostica*. 2011;57(3):126-33.
- 39 65 Patton JH, Stanford MS, Barratt ES. Factor structure of the Barratt impulsiveness scale. *J Clin*  
40 *Psychol*. 1995;51(6):768-74.
- 41 66 Brevers D, Bechara A, Cleeremans A, Noel X. Iowa Gambling Task (IGT): twenty years after –  
42 gambling disorder and IGT. *Frontiers in Psychology*. 2013;4(665).
- 43 67 Bates ME, Lemay EP. The d2 Test of Attention: Construct validity and extensions in scoring  
44 techniques. *Journal of the International Neuropsychological Society*. 2004;10(3):392-400.
- 45 68 Faul F, Erdfelder E, Lang A-G, Buchner A. G\*Power 3: A flexible statistical power analysis program  
46 for the social, behavioral, and biomedical sciences. *Behavior research methods*. 2007;39(2):175-91.
- 47 69 Sala G, Gobet F. Do the benefits of chess instruction transfer to academic and cognitive skills? A  
48 meta-analysis. *Educational Research Review*. 2016;18:46-57.
- 49 70 Kiresuk TJ, Lund SH, Larsen NE. Measurement of goal attainment in clinical and health care  
50 programs. *Drug Intell Clin Pharm*. 1982;16(2):145-53.
- 51 71 Rosenberg MJ. Society and the adolescent self-image. Princeton: Princeton University Press; 1965.
- 52 72 Schwarzer RJ, M. (Hrsg.). Skalen zur Erfassung von Lehrer- und Schülermerkmalen.  
53 Dokumentation der psychometrischen Verfahren im Rahmen der Wissenschaftlichen Begleitung  
54 des



- 1  
2  
3 Modellversuchs Selbstwirksame Schulen. Berlin: Freie Universität; 1999.
- 4 73 Kliem S, Mossle T, Rehbein F, Hellmann DF, Zenger M, Brahler E. A brief form of the Perceived  
5 Social Support Questionnaire (F-SozU) was developed, validated, and standardized. *J Clin Epidemiol*.  
6 2015;68(5):551-62.
- 7 74 Pouwer F, Snoek FJ, van der Ploeg HM, Ader HJ, Heine RJ. The well-being questionnaire: evidence  
8 for a three-factor structure with 12 items (W-BQ12). *Psychol Med*. 2000;30(2):455-62.
- 9 75 Diener E, Emmons RA, Larsen RJ, Griffin S. The Satisfaction With Life Scale. *J Pers Assess*.  
10 1985;49(1):71-5.
- 11 76 Watson D, Clark LA, Tellegen A. Development and validation of brief measures of positive and  
12 negative affect: the PANAS scales. *J Pers Soc Psychol*. 1988;54(6):1063-70.
- 13 77 Laux L, Glanzmann P, Schaffner P, Spielberger C. STAI. *State-Trait-Angstinventar Göttingen: Beltz*  
14 *Test GmbH*. 1981.
- 15 78 Hautzinger M, Bailer M, Worrall H, Keller F. Das Beck-Depressions-Inventar (BDI). Überarbeitet  
16 und ergänzte Neuauflage. Bern: Hans Huber; 1995.
- 17 79 Kühner C, Bürger C, Keller F, Hautzinger M. [Reliability and validity of the Revised Beck Depression  
18 Inventory (BDI-II). Results from German samples]. *Der Nervenarzt*. 2007;78(6):651-6.
- 19 80 Cohen S, Kamarck T, Mermelstein R. A global measure of perceived stress. *J Health Soc Behav*.  
20 1983;24(4):385-96.
- 21 81 Reyes MM, Schneekloth TD, Hitschfeld MJ, Geske JR, Atkinson DL, Karpyak VM. The Clinical Utility  
22 of ASRS-v1.1 for Identifying ADHD in Alcoholics Using PRISM as the Reference Standard. *Journal of*  
23 *Attention Disorders*. 2016;23(10):1119-25.
- 24 82 Rösler M, Retz W, Retz-Junginger P, et al. [Tools for the diagnosis of attention-deficit/hyperactivity  
25 disorder in adults. Self-rating behaviour questionnaire and diagnostic checklist]. *Der Nervenarzt*.  
26 2004;75(9):888-95.
- 27 83 Ersche KD, Lim TV, Ward LHE, Robbins TW, Stoohl J. Creature of Habit: A self-report measure of  
28 habitual routines and automatic tendencies in everyday life. *Pers Individ Dif*. 2017;116:73-85.
- 29 84 Verplanken B, Orbell S. Reflections on Past Behavior: A Self-Report Index of Habit Strength.  
30 *Journal of Applied Social Psychology*. 2003;33:1313-30.
- 31 85 Heatherton TF, Kozlowski LT, Frecker RC, Fagerstrom KO. The Fagerstrom Test for Nicotine  
32 Dependence: a revision of the Fagerstrom Tolerance Questionnaire. *British journal of addiction*.  
33 1991;86(9):1119-27.
- 34 86 Babor TF, Higgins-Biddle JC, Saunders JB, Monteiro MG. Geneva: World Health Organization. 2001.  
35 Available from: <http://www.who.int/iris/handle/10665/67205>.
- 36 87 Sullivan JT, Sykora K, Schneiderman J, Naranjo CA, Sellers EM. Assessment of alcohol withdrawal:  
37 the revised clinical institute withdrawal assessment for alcohol scale (CIWA-Ar). *British journal of*  
38 *addiction*. 1989;84(11):1353-7.
- 39 88 Scheurich A, Muller MJ, Angheliescu I, et al. Reliability and validity of the form 90 interview. *Eur*  
40 *Addict Res*. 2005;11(1):50-6.
- 41 89 Sayette MA, Shiffman S, Tiffany ST, Niaura RS, Martin CS, Shadel WG. The measurement of drug  
42 craving. *Addiction*. 2000;95 Suppl 2:S189-210.
- 43 90 Nakovics H, Diehl A, Croissant B, Mann K. Modifications of the Obsessive Compulsive Drinking  
44 Scale (OCDS-G) for use in longitudinal studies. *Addict Behav*. 2008;33(10):1276-81.
- 45 91 Singleton T, Henningfield. Development and validation of a new questionnaire to assess craving  
46 for alcohol. *Problems of Drug Dependence, 1994*. 1995;11:1.
- 47 92 Vollstadt-Klein S, Lemenager T, Jorde A, Kiefer F, Nakovics H. Development and validation of the  
48 craving automated scale for alcohol. *Alcoholism, clinical and experimental research*. 2015;39(2):333-  
49 42.
- 50 93 Bohn MJ, Krahn DD, Staehler BA. Development and initial validation of a measure of drinking  
51 urges in abstinent alcoholics. *Alcoholism, clinical and experimental research*. 1995;19(3):600-6.
- 52 94 Skinner HA, Allen BA. Alcohol dependence syndrome: measurement and validation. *Journal of*  
53 *abnormal psychology*. 1982;91(3):199-209.
- 54 95 Tiffany ST, Drobes DJ. The development and initial validation of a questionnaire on smoking urges.  
55 *Br J Addict*. 1991;86(11):1467-76.

1  
2  
3 96 Hitsman B, Shen BJ, Cohen RA, et al. Measuring smoking-related preoccupation and compulsive  
4 drive: evaluation of the obsessive compulsive smoking scale. *Psychopharmacology (Berl)*.  
5 2010;211(4):377-87.

6 97 Rash CJ, Copeland AL. The Brief Smoking Consequences Questionnaire-Adult (BSCQ-A):  
7 development of a short form of the SCQ-A. *Nicotine Tob Res*. 2008;10(11):1633-43.

8 98 Castro Y, Kendzor DE, Businelle MS, et al. Structural and predictive equivalency of the Wisconsin  
9 Smoking Withdrawal Scale across three racial/ethnic groups. *Nicotine Tob Res*. 2011;13(7):548-55.  
10  
11  
12  
13  
14  
15  
16  
17  
18  
19  
20  
21  
22  
23  
24  
25  
26  
27  
28  
29  
30  
31  
32  
33  
34  
35  
36  
37  
38  
39  
40  
41  
42  
43  
44  
45  
46  
47  
48  
49  
50  
51  
52  
53  
54  
55  
56  
57  
58  
59  
60

For peer review only



1  
2  
3  
4  
5  
6  
7  
8  
9  
10  
11  
12  
13  
14  
15  
16  
17  
18  
19  
20  
21  
22  
23  
24  
25  
26  
27  
28  
29  
30  
31  
32  
33  
34  
35  
36  
37  
38  
39  
40  
41  
42  
43  
44  
45  
46  
47  
48  
49  
50  
51  
52  
53  
54  
55  
56  
57  
58  
59  
60

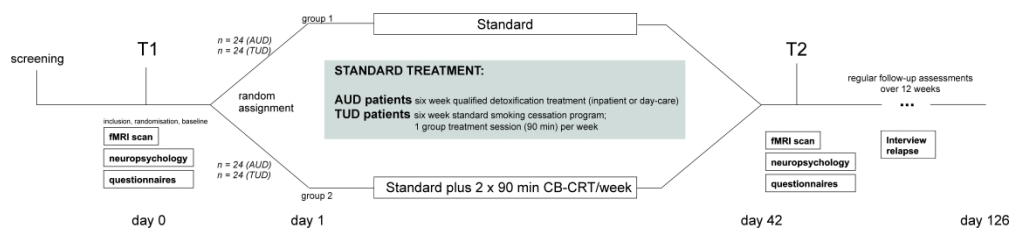

Figure 1: Study design.

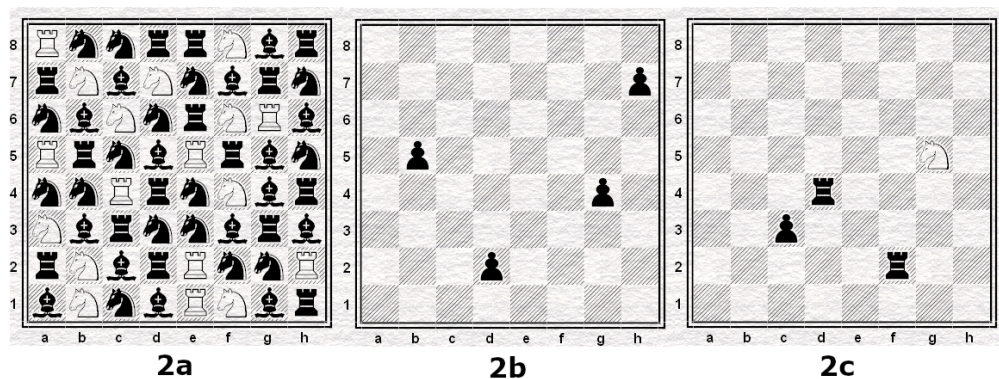

Figure 2: Examples of the chess-based cognitive remediation training.

98x38mm (300 x 300 DPI)

STROBE Statement—Checklist of items that should be included in reports of *case-control studies*

|                              | Item No       | Recommendation                                                                                                                                                                                                                                                                                                                                                                                                |
|------------------------------|---------------|---------------------------------------------------------------------------------------------------------------------------------------------------------------------------------------------------------------------------------------------------------------------------------------------------------------------------------------------------------------------------------------------------------------|
| <b>Title and abstract</b>    | p.1-2         | (a) Indicate the study's design with a commonly used term in the title or the abstract<br>(b) Provide in the abstract an informative and balanced summary of what was done and what was found                                                                                                                                                                                                                 |
| <b>Introduction</b>          |               |                                                                                                                                                                                                                                                                                                                                                                                                               |
| Background/rationale         | p.4-6         | Explain the scientific background and rationale for the investigation being reported                                                                                                                                                                                                                                                                                                                          |
| Objectives                   | p.6;<br>13-14 | State specific objectives, including any prespecified hypotheses                                                                                                                                                                                                                                                                                                                                              |
| <b>Methods</b>               |               |                                                                                                                                                                                                                                                                                                                                                                                                               |
| Study design                 | p.7           | Present key elements of study design early in the paper                                                                                                                                                                                                                                                                                                                                                       |
| Setting                      | p.7           | Describe the setting, locations, and relevant dates, including periods of recruitment, exposure, follow-up, and data collection                                                                                                                                                                                                                                                                               |
| Participants                 | p.8-9         | (a) Give the eligibility criteria, and the sources and methods of case ascertainment and control selection. Give the rationale for the choice of cases and controls<br>(b) For matched studies, give matching criteria and the number of controls per case                                                                                                                                                    |
| Variables                    | p.8-11        | Clearly define all outcomes, exposures, predictors, potential confounders, and effect modifiers. Give diagnostic criteria, if applicable                                                                                                                                                                                                                                                                      |
| Data sources/<br>measurement | p.8-11        | For each variable of interest, give sources of data and details of methods of assessment (measurement). Describe comparability of assessment methods if there is more than one group                                                                                                                                                                                                                          |
| Bias                         | n/a           | Describe any efforts to address potential sources of bias                                                                                                                                                                                                                                                                                                                                                     |
| Study size                   | p.12          | Explain how the study size was arrived at                                                                                                                                                                                                                                                                                                                                                                     |
| Quantitative variables       | n/a           | Explain how quantitative variables were handled in the analyses. If applicable, describe which groupings were chosen and why                                                                                                                                                                                                                                                                                  |
| Statistical methods          | p.12-<br>13   | (a) Describe all statistical methods, including those used to control for confounding<br>(b) Describe any methods used to examine subgroups and interactions<br>(c) Explain how missing data were addressed<br>(d) If applicable, explain how matching of cases and controls was addressed<br>(e) Describe any sensitivity analyses                                                                           |
| <b>Results</b>               |               |                                                                                                                                                                                                                                                                                                                                                                                                               |
| Participants                 | n/a           | (a) Report numbers of individuals at each stage of study—eg numbers potentially eligible, examined for eligibility, confirmed eligible, included in the study, completing follow-up, and analysed<br>(b) Give reasons for non-participation at each stage<br>(c) Consider use of a flow diagram                                                                                                               |
| Descriptive data             | n/a           | (a) Give characteristics of study participants (eg demographic, clinical, social) and information on exposures and potential confounders<br>(b) Indicate number of participants with missing data for each variable of interest                                                                                                                                                                               |
| Outcome data                 | n/a           | Report numbers in each exposure category, or summary measures of exposure                                                                                                                                                                                                                                                                                                                                     |
| Main results                 | n/a           | (a) Give unadjusted estimates and, if applicable, confounder-adjusted estimates and their precision (eg, 95% confidence interval). Make clear which confounders were adjusted for and why they were included<br>(b) Report category boundaries when continuous variables were categorized<br>(c) If relevant, consider translating estimates of relative risk into absolute risk for a meaningful time period |

|                          |         |                                                                                                                                                                            |
|--------------------------|---------|----------------------------------------------------------------------------------------------------------------------------------------------------------------------------|
| Other analyses           | n/a     | Report other analyses done—eg analyses of subgroups and interactions, and sensitivity analyses                                                                             |
| <b>Discussion</b>        |         |                                                                                                                                                                            |
| Key results              | n/a     | Summarise key results with reference to study objectives                                                                                                                   |
| Limitations              | p.14    | Discuss limitations of the study, taking into account sources of potential bias or imprecision.<br>Discuss both direction and magnitude of any potential bias              |
| Interpretation           | n/a     | Give a cautious overall interpretation of results considering objectives, limitations, multiplicity of analyses, results from similar studies, and other relevant evidence |
| Generalisability         | n/a     | Discuss the generalisability (external validity) of the study results                                                                                                      |
| <b>Other information</b> |         |                                                                                                                                                                            |
| Funding                  | p.15-16 | Give the source of funding and the role of the funders for the present study and, if applicable, for the original study on which the present article is based              |

\*Give information separately for cases and controls.

**Note:** An Explanation and Elaboration article discusses each checklist item and gives methodological background and published examples of transparent reporting. The STROBE checklist is best used in conjunction with this article (freely available on the Web sites of PLoS Medicine at <http://www.plosmedicine.org/>, Annals of Internal Medicine at <http://www.annals.org/>, and Epidemiology at <http://www.epidem.com/>). Information on the STROBE Initiative is available at <http://www.strobe-statement.org>.

# BMJ Open

## Effects of chess-based cognitive remediation training as therapy add-on in alcohol and tobacco use disorders: protocol of a randomized, controlled clinical fMRI trial

|                                 |                                                                                                                                                                                                                                                                                                                                                                                                                                                                                                                                                                                                                                                                                                                                                                                                                                                                                                                                                                                                                                                                   |
|---------------------------------|-------------------------------------------------------------------------------------------------------------------------------------------------------------------------------------------------------------------------------------------------------------------------------------------------------------------------------------------------------------------------------------------------------------------------------------------------------------------------------------------------------------------------------------------------------------------------------------------------------------------------------------------------------------------------------------------------------------------------------------------------------------------------------------------------------------------------------------------------------------------------------------------------------------------------------------------------------------------------------------------------------------------------------------------------------------------|
| Journal:                        | <i>BMJ Open</i>                                                                                                                                                                                                                                                                                                                                                                                                                                                                                                                                                                                                                                                                                                                                                                                                                                                                                                                                                                                                                                                   |
| Manuscript ID                   | bmjopen-2021-057707.R2                                                                                                                                                                                                                                                                                                                                                                                                                                                                                                                                                                                                                                                                                                                                                                                                                                                                                                                                                                                                                                            |
| Article Type:                   | Protocol                                                                                                                                                                                                                                                                                                                                                                                                                                                                                                                                                                                                                                                                                                                                                                                                                                                                                                                                                                                                                                                          |
| Date Submitted by the Author:   | 09-Aug-2022                                                                                                                                                                                                                                                                                                                                                                                                                                                                                                                                                                                                                                                                                                                                                                                                                                                                                                                                                                                                                                                       |
| Complete List of Authors:       | Gerhardt, Sarah; Central Institute of Mental Health, Department of Addictive Behavior and Addiction Medicine<br>Lex, Gereon; Central Institute of Mental Health, Department of Addictive Behavior and Addiction Medicine<br>Holzammer, Jennifer; Central Institute of Mental Health, Department of Addictive Behavior and Addiction Medicine<br>Karl, Damian; Central Institute of Mental Health, Department of Addictive Behavior and Addiction Medicine<br>Wieland, Alfred; Central Institute of Mental Health, Institute of Cognitive and Clinical Neuroscience<br>Schmitt, Roland; Central Institute of Mental Health, Department of Addictive Behavior and Addiction Medicine<br>Recuero, Ainoa Jiménez; Club de Ajedrez Magic de Extremadura, Mérida<br>Montero, Juan Antonio; Club de Ajedrez Magic de Extremadura, Mérida<br>Weber, Tillmann; Median Klinik Wilhelmsheim<br>Vollstädt-Klein, Sabine; Central Institute of Mental Health, Department of Addictive Behaviour and Addiction Medicine; Mannheim Center for Translational Neurosciences (MCTN) |
| <b>Primary Subject Heading</b>: | Addiction                                                                                                                                                                                                                                                                                                                                                                                                                                                                                                                                                                                                                                                                                                                                                                                                                                                                                                                                                                                                                                                         |
| Secondary Subject Heading:      | Addiction                                                                                                                                                                                                                                                                                                                                                                                                                                                                                                                                                                                                                                                                                                                                                                                                                                                                                                                                                                                                                                                         |
| Keywords:                       | Substance misuse < PSYCHIATRY, Adult psychiatry < PSYCHIATRY, Magnetic resonance imaging < RADIOLOGY & IMAGING                                                                                                                                                                                                                                                                                                                                                                                                                                                                                                                                                                                                                                                                                                                                                                                                                                                                                                                                                    |
|                                 |                                                                                                                                                                                                                                                                                                                                                                                                                                                                                                                                                                                                                                                                                                                                                                                                                                                                                                                                                                                                                                                                   |

SCHOLARONE™  
Manuscripts

1  
2  
3 **Effects of chess-based cognitive remediation training as therapy add-on in alcohol and**  
4 **tobacco use disorders: protocol of a randomized, controlled clinical fMRI trial**  
5

6  
7 *Sarah Gerhardt<sup>1</sup>, Gereon Lex<sup>1</sup>, Jennifer Holzammer<sup>1</sup>, Damian Karl<sup>1</sup>, Alfred Wieland<sup>2</sup>, Roland*  
8 *Schmitt<sup>1</sup>, Ainoa Jiménez Recuero<sup>3</sup>, Juan Antonio Montero<sup>3</sup>, Tillmann Weber<sup>4</sup>, Sabine Vollstädt-*  
9 *Klein<sup>1,5</sup> #*  
10

11  
12 <sup>1</sup> Department of Addictive Behavior and Addiction Medicine, Central Institute of Mental Health,  
13 Medical Faculty Mannheim, Heidelberg University, Mannheim, Germany.  
14

15  
16 <sup>2</sup> Institute of Cognitive and Clinical Neuroscience, Central Institute of Mental Health, Medical Faculty  
17 Mannheim, Heidelberg University, Mannheim, Germany.  
18

19  
20 <sup>3</sup> Club de Ajedrez Magic de Extremadura, Mérida, Badajoz, Spain.  
21

22  
23 <sup>4</sup> MEDIAN Kliniken Wilhelmsheim, Oppenweiler, Germany.  
24

25  
26 <sup>5</sup> Mannheim Center for Translational Neurosciences (MCTN), Medical Faculty Mannheim, Heidelberg  
27 University, Mannheim, Germany.  
28

29  
30  
31 # Corresponding Author

32  
33 Sabine Vollstädt-Klein, Department of Addictive Behavior and Addiction Medicine, Central Institute of  
34 Mental Health, Mannheim, Medical Faculty Mannheim, University of Heidelberg, Germany, PO Box  
35 12 21 20, D-68072 Mannheim, Germany. Tel.: 0621 1703-3912, Fax: 0621 1703-3505, E-mail:  
36 S.Vollstaedt-Klein@zi-mannheim.de  
37  
38  
39  
40  
41  
42  
43  
44  
45  
46  
47  
48  
49  
50  
51  
52  
53  
54  
55  
56  
57  
58  
59  
60

## Abstract

### **Background**

Alcohol and tobacco use disorders (AUD, TUD) are frequent, both worldwide and in the German population, and cognitive impairments are known to facilitate instances of relapse. Cognitive training has been proposed for enhancing cognitive functioning and possibly improving treatment outcome in mental disorders. However, these effects and underlying neurobiological mechanisms are not yet fully understood regarding AUD and TUD. Examining the effect of chess-based cognitive remediation training (CB-CRT) on neurobiological, neuropsychological and psychosocial aspects as well as treatment outcomes will provide insights into mechanisms underlying relapse and abstinence and might help to improve health behaviour in affected individuals if used as therapy add-on.

### **Methods and Analysis**

N=96 individuals with either AUD (N=48) or TUD (N=48) between 18 and 65 years of age will participate in a randomized, controlled clinical fMRI trial. Two control groups will receive treatment as usual, i.e., AUD treatment in a clinic, TUD outpatient treatment. Two therapy add-on groups will receive a 6-week CB-CRT as a therapy add-on. Functional magnetic resonance imaging (fMRI) tasks, neurocognitive tests will be administered before and afterwards. All individuals will be followed up on monthly for three months. Endpoints include alterations in neural activation and neuropsychological task performance, psychosocial functioning, and relapse or substance intake. Regarding fMRI analyses, a General Linear Model (GLM) will be applied and t-tests, full factorial models and regression analyses will be conducted on the second level. Behavioural and psychometric data will be analysed using t-tests, regression analyses, repeated-measures and one-way ANOVAs.

### **Ethics and Dissemination**

This study has been approved by the ethics committee of the Medical Faculty Mannheim of the University of Heidelberg (2017-647N-MA). The findings of this study will be presented at conferences and published in peer-reviewed journals.

### **Trial registration**

The study was registered in the Clinical Trials Register (trial identifier: NCT04057534 at [clinicaltrials.gov](http://clinicaltrials.gov)).

**Strengths and Limitations of this study**

- The evaluation of the efficacy of CB-CRT as a supportive therapy add-on for SUD might lead to cost-efficient positive treatment outcomes.
- The use of objective measures to examine underlying neurobiopsychological mechanisms expands the current research on risk factors for relapse.
- The inclusion of two substances (alcohol and tobacco) increases the generalizability of the findings.
- The 6-week long therapy add-on might lead to drop-outs due to the large amount of time participants have to commit to the program.

For peer review only



## Introduction

Substance use, including alcohol and tobacco use, is widespread both worldwide and in the German population. Worldwide, the prevalence for heavy episodic drinking of alcohol was estimated at 18.4% for adults, while daily smoking was estimated at 15.2%[1]. In 2018 in Germany, the prevalence of hazardous consumption of alcohol was estimated at 19.1%, and the 12-month prevalence for alcohol use disorder (AUD) at 5.9%. The prevalence of daily consumption of tobacco was estimated at 15.1%, and the 12-month prevalence for tobacco use disorder (TUD) at 8.6%[2]. In Germany, follow-up costs of alcohol use are estimated at 21 billion euros[3] and for tobacco use at 24 billion euros[4]. Furthermore, negative effects on health and on mortality rates are associated with TUD[5].

For individuals with AUD having undergone treatment, relapse rates between 22 and 86% have been observed during short-term follow-ups (16 weeks) up to a long-term follow-up of 16 years[6-8]. Following treatment, the relapse rate for TUD after one year is estimated to be between 2 and 17%[9]. A relapse can be brought on by heightened stress sensitivity, depressive mood, increased anxiety, or confrontation with a substance-related stimulus[10-12].

Even though some studies postulate intact, goal-directed behaviour in individuals with SUD [13-15], others observed neurobiological impairments in brain areas involved in inhibitory control in individuals with SUD[16-19]. In a model proposed by Bechara, SUD is viewed as an imbalance between two distinct, but closely interacting neural systems[20], which are essential for decision-making: The impulsive system is involved in the prediction and valuation of immediate rewards and includes such regions as the amygdala and the striatum. The reflective system signals long-term consequences of actions and involves the ventromedial prefrontal cortex (VMPFC), the dorsolateral prefrontal cortex (DLPFC), the anterior cingulate, the insula, and the hippocampus. In SUD, it is assumed that the impulsive system becomes overactive, preventing the reflective system from exerting executive cognitive control over substance use. It might be those immediate rewards, such as pleasant effects derived from alcohol or nicotine consumption, are overvalued, and give preference over future rewards, such as health benefits associated with abstinence. Individuals with SUD also demonstrate a preference for smaller, immediate monetary rewards over larger, delayed ones[21]. Furthermore, the imbalance between impulsive and reflective systems reveals itself in dysfunctional inhibitory control, leading to increased risk taking[20]. Beyond these

1  
2  
3 impairments, individuals with SUD also demonstrate reduced cognitive functioning in the  
4 domains of problem solving, mental flexibility, forming judgments, and working memory[22].  
5 A study using functional magnetic resonance imaging (fMRI)[23] found less activation in the  
6 right frontal cortex during a response inhibition task was associated with more cigarettes  
7 smoked in participants wanting to quit smoking. Other studies using fMRI have revealed a shift  
8 of neural activation from the ventral (nucleus accumbens) to the dorsal striatum (putamen  
9 and nucleus caudate), which was suggested to reflect a decrease in cortical control when  
10 viewing substance related cues [24]. Being related to executive functions, metacognitive  
11 abilities and beliefs play a major role in addiction[25]. In general, metacognition refers to the  
12 ability to know about cognition in general but, more importantly, to be aware of and know  
13 about one's own cognition[26]. Prefrontal regions, as well as the precuneus or dorsal anterior  
14 cingulate cortex seem to play an important role[27]. Generic and dysfunctional metacognitive  
15 beliefs, but also metacognitive beliefs about addiction-related thoughts or craving can predict  
16 the severity of addictive behaviour, craving, and relapse[25].

17  
18 „Cognitive remediation“ (Cognitive remediation therapy (CRT)) is a psychotherapeutic  
19 approach to improve cognitive deficits[28]. Cognitive training exercises span functional  
20 domains from executive functioning (inhibition, decision-making, cognitive flexibility, and  
21 working memory) to attention. Through repeated training, CRT can systematically stimulate  
22 and strengthen cognitive processes. A primary therapeutic objective is to improve the efficacy  
23 of other psychotherapeutic interventions, which require a minimal level of cognitive skill[29].  
24 For example, it has been demonstrated that executive functioning skills can influence the  
25 efficacy of cognitive behavioural therapy[30]. CRT, specifically, has already been  
26 demonstrated to be successful as an add-on therapy in treating schizophrenia and eating  
27 disorders[31]. However, it has been suggested to explicitly teach metacognitive abilities in  
28 order to improve the outcome of CRT[32], since this might be a significant mechanism  
29 contributing to the effects of CRT in patients with schizophrenia[33]. Indeed, recent  
30 observations indicate a beneficial effect of CRT on metacognitive abilities, e.g., in  
31 schizophrenia[34]. As an add-on therapy to treat substance use disorders CRT seems  
32 promising[35] and cognitive training mostly results in improvements within the respective  
33 domains[36]. However, there is a lack of studies examining the efficacy of CRT as a modulator  
34 of cognition to improve treatment outcomes[37] and findings on the positive outcome  
35 following cognitive trainings in AUD are still mixed[38] or not present[39]. A review on  
36  
37  
38  
39  
40  
41  
42  
43  
44  
45  
46  
47  
48  
49  
50  
51  
52  
53  
54  
55  
56  
57  
58  
59  
60

1  
2  
3 AUD[40] discussed that CRT improves split attention, recognition of warning signals, working  
4 memory, as well as episodic memory. Most relevantly, an improvement in working memory  
5 and inhibitory control was able to exert a positive influence on substance use patterns[40].  
6  
7 Additionally, including metacognitive trainings when treating individuals with SUD might be  
8 advantageous[25, 41].  
9  
10

11  
12 Finally, promising studies have demonstrated a potential beneficial effect of classical chess  
13 training on the treatment of attention deficit hyperactivity disorder (ADHD) and schizophrenia  
14 as an add-on therapy. In the case of ADHD, classical chess training was able to effectively  
15 reduce disease severity[42]. A further study in patients with ADHD showed an improvement  
16 in the ability to concentrate[43]. Negative symptoms common to patients suffering from  
17 schizophrenia include a wide variety of cognitive deficits, including impaired attention-,  
18 memory-, learning- and problem-solving skills[44]. Chess training was able to rescue some of  
19 these deficits experienced by schizophrenic patients, improving voluntary processing,  
20 inhibitory capacity and planning proficiencies[45]. Examining the effects of chess training on  
21 mathematical problem-solving and metacognitive abilities in school children, no significant  
22 effects were observed compared to an active control group playing checkers and a passive  
23 control group[46].  
24  
25

26  
27 Besides the known effects of CRT on metacognition, the beneficial effect of chess-based CRT  
28 still remains unclear. However, present findings suggest that chess-based CRT might be able  
29 to improve cognitive functioning in domains which can be improved by classical CRT, while  
30 simultaneously potentially improving specific domains modulated by chess-based  
31 interventions.  
32  
33

34  
35 Consequently, our study aims to assess the effects of chess-based CRT (CB-CRT) on underlying  
36 neurobiological mechanisms of CB-CRT in AUD and TUD. We will use a novel and structured  
37 training program that, besides training cognitive functioning, includes metacognitive methods  
38 and social reinforcement. As a result of the comprehensiveness of the proposed study and the  
39 novel CB-CRT we will further assess the influence of CB-CRT on different aspects of cognition  
40 and psychosocial functioning as well as treatment outcome in individuals with AUD and TUD.  
41  
42  
43  
44  
45  
46  
47  
48  
49  
50  
51  
52  
53  
54  
55  
56  
57  
58  
59  
60

## Method and Analyses

To investigate the effects of CB-CRT as a therapy add-on in alcohol and tobacco use disorders, N = 96 individuals will be examined in a randomized, controlled clinical fMRI trial. N = 48 AUD participants undergoing a qualified therapy or rehabilitation treatment for alcohol use disorder and N = 48 TUD participants who participate in a qualified smoking cessation group therapy will be included in the study. The Consolidated Standards Reporting Trials (CONSORT) statement was used for developing the study framework. Individuals with a diagnosis of AUD will be recruited from the out-patient and in-patient clinics of the Department of Addictive Behaviour and Addiction Medicine at the Central Institute of Mental Health and from the residential addiction treatment center MEDIAN Klinik Wilhelmsheim, Germany. Individuals with TUD will be recruited using public announcements including, flyers, and social media posts.

Half of each group (AUD, TUD) will be randomly assigned to either the control group or experimental group. Regarding the control groups, N = 24 AUD participants receive an in-patient qualified detoxification treatment program, an in- or out-patient rehabilitation program, or semi-inpatient therapy in a day-clinic. N = 24 TUD participants receive qualified smoking cessation group therapy following study inclusion. The out-patient smoking cessation therapy lasts for 6 weeks with one group therapy session à 1.5 hours per week. Individuals randomly allocated to the experimental group (24 individuals with AUD and 24 individuals with TUD) will receive CB-CRT for 1.5 hours twice a week for 6 weeks in addition to the standard treatment.

## Patient and public involvement

Individuals currently or formerly affected by either AUD or TUD were involved in the development of the study design including outcome measurements. Two research colleagues with insight from both perspectives were consulted and supported the development and implementation of the study. The chess-based cognitive remediation training was utilized in practice as described in the following including patients with diverse mental disorders. It therefore grew in correspondence with the patients' feedback. In addition, a pilot study with patient from an addiction rehabilitation center resulted in good to very good patient ratings regarding helpfulness and acceptance. We will disseminate study results to interested patients. Also all study participants will always be able to discuss open questions throughout

1  
2  
3 the process of the training with qualified research staff and they will receive feedback  
4 regarding the goals of the training and study and the background of the methods used for  
5 training and study examination.  
6  
7

8 No patients are involved in the recruitment procedure and conduct of the study and the  
9 burden of study participation was not assessed beforehand by patients.  
10  
11  
12  
13

### 14 ***Examination procedure***

15 Eligible participants between 18 and 65 years will be informed about the purpose and all  
16 aspects of the study. They will be provided with written study information according to the  
17 ethics regulations. Participants will be able to ask questions regarding the study. Afterwards,  
18 written informed consent will be obtained. All participants can withdraw their consent at any  
19 time. Then, study exclusion- and inclusion criteria will be examined. To do so, a structured  
20 clinical interview (SCID-5-CV)[47] will be performed to assess a possible history of lifetime and  
21 current mental disorders. Individuals with a diagnosis of severe mental or personality  
22 disorders will be excluded, e.g., lifetime bipolar disorder or schizophrenia or current severe  
23 depression, post-traumatic stress disorder. Current mild or moderate mental or personality  
24 disorders, such as mild anxiety-, adaptation, personality disorders or depression, will be  
25 tolerated. Individuals with AUD are included in the study after controlled abstinence for at  
26 least 72 hours, including completion of medically supervised detoxification (treatment of  
27 withdrawal symptoms with short-acting benzodiazepines or chlormethiazole must have been  
28 completed for at least three days). Individuals with TUD will be included following the  
29 intention to quit smoking. A detailed list of all inclusion and exclusion criteria regarding AUD  
30 and TUD are shown in table 1. Following study inclusion, participants will be randomly  
31 assigned to either the control or experimental group.  
32  
33  
34  
35  
36  
37  
38  
39  
40  
41  
42  
43  
44  
45  
46

47 At the baseline examination appointment (T1) all participants will provide sociodemographic  
48 information and perform several neuropsychological tasks. An fMRI assessment will then take  
49 place. Participants will also fill out several questionnaires directly after the baseline  
50 assessment. After the 6 week long intervention period - either standard treatment alone or  
51 with CB-CRT as therapy add-on - a second examination appointment (T2) takes place. All  
52 participants will perform the same neuropsychological tasks again and the same fMRI  
53 assessment as conducted in T1 will take place. Participants will also fill out the same  
54 questionnaires as for T1. During a follow-up period of 12 weeks following the intervention,  
55  
56  
57  
58  
59  
60

1  
2  
3 three telephone interviews (FU1, FU2, T3) will be conducted once a month. Instances of  
4 relapse and amount of tobacco or alcohol consumption will be documented. Beyond this, the  
5 same questionnaires as for T1 and T2 will be completed.  
6  
7

8 Please see figure 1 for a detailed description of the study procedure and tables 2 and 3 for list  
9 of assessments used, including fMRI and neuropsychological paradigms, and questionnaires.  
10  
11  
12  
13

### 14 ***Standard Treatment***

15 All study participants (TUD and AUD) will follow their respective treatment as usual (TAU).  
16 With regards to TUD, a qualified smoking cessation group therapy with one therapy session  
17 per week (90 minutes) will be held by a trained and certified psychologist. This intervention is  
18 strongly recommended in the latest version of the S3 guidelines for tobacco use disorder[48].  
19 A superior effect on smoking cessation was observed following group therapy compared to,  
20 e.g., self-help or less intense interventions[49]. During the qualified smoking cessation group  
21 therapy, interventions following a cognitive-behavioural psychotherapy approach will be  
22 applied[50]. Study participants with AUD will follow the respective in-house or day-clinic  
23 therapeutic programme, as recommended by the respective S3 guidelines for alcohol use  
24 disorder[51]. This standard treatment includes medical and psychological interventions.  
25  
26  
27  
28  
29  
30  
31  
32  
33  
34  
35

### 36 ***Chess-based cognitive remediation training***

37 The planned CB-CRT „Entrenamiento cognitivo a través del ajedrez (ECAM, „Cognitive training  
38 through chess“, <https://ajedrezmagic.es/el-entrenamiento-cognitivo-a-traves-del-ajedrez/>)  
39 consists of a battery of tasks and was developed by one of the co-authors (J. A. M.). The  
40 training battery, which is administered in a group setting using mainly a chess demonstration  
41 board, is designed to strengthen cognitive functioning in specific domains such as selective  
42 attention (figure 2a), short-term memory (figure 2b), focal attention, pattern recognition,  
43 visuospatial abilities, planification skills (figure 2c), and inhibition. Participants do not need to  
44 know the game of chess. They will receive general information about the rules and strategies  
45 used for the corresponding training day. Overall, metacognitive abilities are trained as well,  
46 e.g., by giving psychoeducational information regarding different concepts of cognitive  
47 functioning, questioning, and identifying the underlying cognitive process, and enhancing the  
48 awareness of before mentioned aspects. Participants perform most of the specific tasks in  
49 front of the group and, for a social reinforcement effect, everyone will applaud the respective  
50  
51  
52  
53  
54  
55  
56  
57  
58  
59  
60

1  
2  
3 participant. Some of the tasks are conducted via paper-pencil. The training battery has been  
4 utilized for more than ten years by J.A.M and his colleagues as an add-on therapy for elderly  
5 individuals, children with autism and/or ADHD, individuals with Down Syndrome, mental and  
6 other disorders, and in adults with SUD. The scientific evaluation of the program is one of the  
7 goals of the current study.  
8  
9  
10  
11

12  
13 In an unpublished pilot study in the rehabilitation clinic at Comunidad Terapéutica La  
14 Garrovilla, N = 26 patients with SUD (N = 22 male; substances: alcohol, opiates, cocaine,  
15 benzodiazepines, cannabis) were examined. CB-CRT was applied in a group setting twice a  
16 week for a duration of 90 minutes each. Cognitive functioning, especially in executive  
17 functions, was assessed at admission to the clinic at Comunidad Terapéutica La Garrovilla,  
18 Badajoz (Extremadura, Spain) and again after 14 weeks. The neuropsychological testing  
19 battery included measures of general processing speed (trail-making test A), cognitive  
20 flexibility (trail-making test B)[52], planning abilities (Tower of London)[53] and intelligence  
21 (Wechsler Adult Intelligence Scale, WAIS). Significant increases in performance were found  
22 after 14 weeks of treatment in general processing speed (trail-making test A;  $p = .001$ ),  
23 cognitive flexibility (trail-making test B;  $p = .013$ ), the Tower of London test ( $p = .001$ ) as well  
24 as in the WAIS measures for verbal comprehension (“similarities”,  $p = .019$ ) and for working  
25 memory (“letter-number sequencing”,  $p = .030$ , “digit span forward”,  $p = .044$ , “digit span  
26 backward”,  $p = .018$ , “digit span total”,  $p = .007$ ). Performance in the WAIS measures “coding”  
27 (processing speed) and “matrix reasoning” (perceptual reasoning) did not differ significantly.  
28  
29 In another sample of N = 15 patients receiving the chess-based add-on treatment for 3.5  
30 months, subjective satisfaction was evaluated. On scales ranging from 1 (very unsatisfied /  
31 very poor) to 4 (very satisfied / very good), 73% of the patients rated the overall program as  
32 very good (i. e. score of 4). 67% of the patients found the program very helpful in treating their  
33 SUD (score of 4), 27% found it helpful (score of 3). Further, when asked how the program  
34 influenced other domains being negatively affected by SUD before admission, 53% found the  
35 program very supportive (score of 4), 27% found it supportive (score of 3). Besides this, 87%  
36 reported that the program helped them to increase their memory capabilities, 93% stated a  
37 subjective increase in attention performance, and 93% reported an enhancement in decision-  
38 making.  
39  
40  
41  
42  
43  
44  
45  
46  
47  
48  
49  
50  
51  
52  
53  
54  
55  
56  
57

### 58 ***Self-rating Questionnaires***

59  
60



1  
2  
3 Self-rating questionnaires will be administered to address factors related to, e.g.,  
4 impulsiveness and inhibitory control, mood, psychosocial functioning, as well as substance  
5 consumption, or craving. Please see Table 2 for a detailed list.  
6  
7  
8  
9

### 10 ***Neuropsychological assessments***

11  
12 Tasks investigating components of working memory (Wechsler Memory Scale-3)[54],  
13 decision-making (Iowa Gambling Task)[55], as well as mental flexibility (Dimensional Change  
14 Card Sort)[56] and attentional capacity (d2-R Test of Attention)[57] will be administered.  
15  
16  
17  
18

### 19 ***fMRI assessments***

20  
21 During the fMRI scanner examination, study participants will perform a stop-signal task[58],  
22 alcohol- and tobacco based cue-reactivity tasks[59, 60], an N-back task[61] and a resting-state  
23 MRI. Scanning will be performed with a 3T whole-body tomograph (MAGNETOM Prisma;  
24 Siemens, Erlangen, Germany). T2\* weighted multi-band echo-planar images (mb-EPI) using a  
25 multi-band acceleration factor 6 will be acquired in a transversal orientation 20° clockwise to  
26 AC-PC-line covering the whole brain (TR = 869 ms, TE = 38 ms, 60 slices, slice thickness = 2.4  
27 mm, voxel size 2.4 × 2.4 × 2.4 mm, no inter-slice gap, field of view (FoV) = 210 mm, matrix size  
28 88 × 88, acquisition orientation T > C, interleaved slice order, acceleration factor slice = 6, flip  
29 angle = 58°, bandwidth = 1832 Hz/Px, prescan normalize, weak raw data filter, LeakBlock  
30 kernel, fat sat). This short TE and the 20° flip to AC-PC orientation is chosen to minimize  
31 susceptibility artefacts. Scanner sequences are provided by the Center for Magnetic  
32 Resonance Research (CMRR), University of Minnesota, Minneapolis, MN, USA  
33 (<https://www.cmrr.umn.edu/multiband/>)[62]. In addition, a T1-weighted 3D MPRAGE  
34 (Magnetization Prepared - RApid Gradient Echo) dataset consisting of 208 sagittal slices (slice  
35 thickness 1 mm, 1×1×1 mm voxel size, FOV 256 × 256 mm<sup>2</sup>, TR= 2000ms, TE = 2.01 ms, TI =  
36 800 ms, flip angle = 8°) will be acquired.  
37  
38  
39  
40  
41  
42  
43  
44  
45  
46  
47  
48  
49  
50  
51

### 52 ***Endpoints***

53  
54 endpoints are changes in neural alcohol and tobacco cue-reactivity[59, 60] (e.g., reduction in  
55 substance-related activation of striatal brain regions), neural correlates of inhibition (stop-  
56 signal task)[63] (e.g., increased dorsolateral prefrontal neural activation) and working memory  
57 (N-back task)[61] (e.g., increased inferior frontal neural activation), as well as functional  
58  
59  
60



connectivity within the salience network (SN; insula, anterior cingulate cortex) and executive control network (ECN; dorsolateral frontal and lateral posterior parietal cortices) using resting-state fMRI data. Also, working memory capacity (letter-number sequencing task of the Wechsler Memory Scale-3)[54], impulsivity (Barratt Impulsiveness Scale-15)[64, 65], mental flexibility (Dimensional Change Card Sort)[56], decision-making (Iowa Gambling Task)[55, 66] and attentional capacity (d2-R Test of Attention)[67], summarized as cognitive functioning, are endpoints of interest. Additionally, the duration until the first severe relapse (daily smoking of at least one cigarette at day, consumption of more than 48 grams (females) or 60 grams (males) of alcohol) during the follow-up periods and amount of substance consumption in case of a relapse as well as improvements in psychosocial functioning will be examined.

### ***Sample size calculation***

Using the software package G\*Power[68] the sample size calculation was conducted for the main primary outcomes, i.e., neurobiological correlates underlying adaptations following the CB-CRT, where we expected a minimum effect size of  $f = 0.2$  for all constructs (ANOVA with repeated measures, within- and between subject factors and interactions). In this case, ideal sample coverage would be 24 individuals per group (at 80% power, alpha-level 5%).

### ***Data analysis plan***

To analyse psychometric and neuropsychological data, SPSS (Statistics for Windows, Version 25.0. IBM Corp., Armonk, NY) will be used. The various dependent variables will be evaluated using multivariate analyses of variance with repeated measures. To counteract possible group differences at baseline, a percentage in change (divide by T1 values) or variable values at T1 can be incorporated in subsequent statistical analyses as a covariate. In addition, linear regression models will be calculated to examine the influence of confounding variables (for example, severity of tobacco or alcohol dependence) on the observed change in dependent variables as described previously (e.g., craving, task performance, psychosocial well-being). Cox-regression analyses, including, e.g., brain activation in the dorsolateral prefrontal or inferior frontal regions during inhibition and executive functioning, or the ventral striatum during cue reactivity tasks as predictors, will be conducted to examine the association with relapse. To analyse the fMRI data, SPM12 (Wellcome Department of Cognitive Neurology, London, UK) running under Matlab will be used. The pre-processing pipeline will include

1  
2  
3 motion correction, normalization to the Montreal Neurological Institute (MNI) template, and  
4 a spatial smoothing with Gaussian kernel of 8 mm full width at half maximum (FWHM) will be  
5 conducted. The pre-processed data will then be used for first- and second-level analyses. On  
6 the first level (within-subject), neural activation associated with task conditions (contrasts)  
7 will be modelled via a convolution with a canonical hemodynamic response function (HFR)  
8 following a general linear model (GLM). A high-pass filter to remove low-frequency  
9 components of fMRI time-series will be used. Depending on the fMRI tasks, specific contrasts  
10 regarding task conditions will be modelled as described in the above cited literature. On the  
11 second level (between-subject) and regarding the effects of group and time, paired t-tests  
12 (e.g., pre vs. post intervention within one group) and full factorial models will be used.  
13 Additionally, regression models including clinical variables, such as severity of TUD or AUD,  
14 will be calculated. To control for multiple statistical testing, we will use established correction  
15 procedures, e.g., whole brain family-wise error correction (FWE) for fMRI analyses or  
16 Bonferroni correction for other statistical analyses.  
17  
18  
19  
20  
21  
22  
23  
24  
25  
26  
27  
28  
29  
30

## 31 **Hypotheses**

### 32 *Primary hypotheses*

- 34 1. CB-CRT improves aberrant neural alcohol cue-reactivity (measured by alcohol and  
35 tobacco cue-reactivity fMRI tasks) in AUD/TUD in comparison to standard treatment  
36 alone  
37
- 38 2. CB-CRT improves neuronal aberrations present when executing cognitive tasks  
39 (measured by N-back and stop-signal fMRI task) in individuals with AUD/TUD in  
40 comparison to standard treatment alone.  
41
- 42 3. CB-CRT decreases functional connectivity within the salience network in individuals  
43 with AUD/TUD in comparison to standard treatment alone.  
44
- 45 4. CB-CRT decreases functional connectivity within the executive control network in  
46 individuals with AUD/TUD in comparison to standard treatment alone.  
47
- 48 5. CB-CRT improves cognitive functioning (measured by neuropsychological tasks) in  
49 AUD/TUD individuals in comparison to standard treatment alone.  
50
- 51 6. CB-CRT improves psychosocial functioning (measured by, e.g., HSWBS, SWLS) in  
52 AUD/TUD individuals in comparison to standard treatment alone. CB-CRT influences  
53  
54  
55  
56  
57  
58  
59  
60

1  
2  
3 the treatment process, e.g., time to first severe relapse, for AUD/TUD individuals  
4  
5 positively in comparison to standard treatment alone.  
6

### 7 *Secondary hypotheses*

- 8 1. CB-CRT might be more efficacious in individuals with impaired cognitive functioning,  
9 low self-esteem, self-efficacy, and social support.  
10
- 11 2. Chess as a three-week add-on therapy influences the treatment process, e.g., time to  
12 first severe relapse for AUD/TUD individuals moderated and mediated by cognitive,  
13 affective, and psychosocial factors.  
14  
15  
16  
17  
18  
19

### 20 **Discussion**

21 The here presented study aims to examine the effect of CB-CRT as treatment add-on on  
22 neurobiological processes but also neuropsychological and psychosocial functioning known to  
23 contribute to the development and maintenance of AUD and TUD. The effect of CB-CRT might  
24 also results in longer times of abstinence or reduced substance consumption. If CB-CRT as  
25 therapy add-on, as examined in this comprehensive study, shows to be more effective than  
26 standard treatment alone, this intervention might help to improve health behaviour in  
27 affected individuals.  
28

29 Limitations with respect to the interpretability of the data might derive from the study design.  
30 We aim to examine the superior effect of CB-CRT compared to treatment as usual in therapy  
31 outcomes that might rely on neurobiological alterations following this training. As postulated  
32 by Sala and Gobet (69) a third, active control group might be needed to ultimately evaluate  
33 the chess-specific mechanisms and outcomes. Therefore and in case of successfully  
34 demonstrating a superior effect of our CB-CRT, a subsequent study might be needed to  
35 address this question. Further, even in light of our future results confirming a superior effect  
36 of CB-CRT as therapy add-on on neurobiological and neuropsychological processes, these  
37 improvements might to translate to longer abstinence or a reduction in the amount of  
38 substance consumption. Previously, this has been demonstrated in AUD: Even though an  
39 improvement in working memory functioning has been observed following an active working-  
40 memory training in patients with AUD, heavy drinking and neuropsychological functioning in  
41 other domains remained unchanged[39].  
42  
43  
44  
45  
46  
47  
48  
49  
50  
51  
52  
53  
54  
55  
56  
57

58 Since the described study includes a cognitive remediation training that exceeds merely  
59 training individual domains, we hope to counteract limitations of previous studies. Including  
60

1  
2  
3 social (training in the group) and metacognitive aspects, the CB-CRT might generalize from  
4 altering neurobiological processing to behavioural changes, i.e. substance consumption.  
5  
6  
7

### 8 **Ethics and dissemination**

9  
10 The study was approved by the local Ethics Committee of the Medical Faculty Mannheim at  
11 the University of Heidelberg, Germany (reference number 2017-647N-MA). Before study  
12 inclusion and after a detailed explanation of all procedures, all participants will provide written  
13 informed consent. The study was registered in the Clinical Trials Register (trial identifier:  
14 NCT04057534) on December 8th, 2019. The study results will be disseminated by peer-review  
15 publications and conference presentations. Open-access publication is planned for all peer-  
16 reviewed publications. All participants are offered to receive a print of the final, published  
17 version of peer-reviewed publications. For protection of personal rights, and due to the  
18 sensitivity of the clinical and neuroimaging data, data will not be made publicly available. Upon  
19 direct request by other researchers and in mutual agreements (e.g., regarding data  
20 protection), anonymized data can be made available. Upon request, analysis procedures and  
21 codes will be shared with other researchers.  
22  
23  
24  
25  
26  
27  
28  
29  
30  
31  
32  
33  
34  
35

### 36 **Risks associated with participation**

37 Participants will be asked several questions regarding their substance consumption, mood,  
38 quality of life. They will additionally perform neuropsychological and fMRI tasks. Both excerpts  
39 a strain on the participants in terms of time and effort. Further, it may cause emotional  
40 discomfort in some participants. To counteract these possible negative consequences of study  
41 participations, the research team, also consisting of psychologists and psychotherapists in  
42 training, will regularly check if participants and evaluate their (dis)comfort. Contact to  
43 qualified clinicians will be made possible in case of severe emotional discomfort. Due to the  
44 length of the study appointments, we will offer participants the option to flexibly answer most  
45 of the questionnaires at home.  
46  
47  
48  
49  
50  
51  
52  
53  
54  
55  
56  
57

### 58 **Funding**

1  
2  
3 This study is supported by a grant from the Deutsche Forschungsgemeinschaft (Grant ID  
4 421888313). The Deutsche Forschungsgemeinschaft was not involved in the planning of the  
5 study, and will not be involved in data collection, analyses or publication procedures.  
6  
7  
8  
9  
10

### 11 **Availability of data and materials**

12  
13  
14 For protection of personal rights, and due to the sensitivity of the clinical and neuroimaging  
15 data, data will not be made publicly available. Upon direct request by other researchers and  
16 in mutual agreements (e.g., regarding data protection), anonymized data can be made  
17 available. Upon request, analysis procedures and codes will be shared with other researchers.  
18  
19  
20  
21  
22  
23  
24

### 25 **Acknowledgements**

26  
27  
28 We would like to thank Carmen Gaitan Coronado for their training in ECAM and their help in  
29 creating the therapy manual and Alycia Lee for English editing. We gratefully acknowledge the  
30 support of our colleagues, formerly affected by AUD or TUD, and our study participants  
31 regarding the planning, implementation and conduct of the study.  
32  
33  
34  
35  
36  
37  
38

### 39 **Authors contributions**

40  
41  
42 SVK designed the study. TW, GL, JH helped with designing the study. JAM developed the chess-  
43 based remediation training ECAM. GL, JH, RS, AJR, DK, AW, SVK, SG adapted the training. SG,  
44 GL, and SVK wrote the manuscript. All authors read and approved the manuscript.  
45  
46  
47  
48  
49  
50

### 51 **Conflicts of interest**

52  
53 All authors have no conflict of interest to declare.  
54  
55  
56  
57  
58  
59  
60

1  
2  
3  
4  
5  
6  
7  
8  
9  
10  
11  
12  
13  
14  
15  
16  
17  
18  
19  
20  
21  
22  
23  
24  
25  
26  
27  
28  
29  
30  
31  
32  
33  
34  
35  
36  
37  
38  
39  
40  
41  
42  
43  
44  
45  
46  
47  
48  
49  
50  
51  
52  
53  
54  
55  
56  
57  
58  
59  
60

For peer review only

## Tables

Table 1: Inclusion and exclusion criteria of the overall study sample. Specific criteria for AUD and TUD are highlighted.

| Inclusion criteria                                                                                                                                                                                                           |                                                                                                                                                               | Exclusion criteria                                                                                                                                                                                                                                                                                                                                                                                                                                                                                                                                                                                 |                                                                                                                                                                                                                                                                                                                |
|------------------------------------------------------------------------------------------------------------------------------------------------------------------------------------------------------------------------------|---------------------------------------------------------------------------------------------------------------------------------------------------------------|----------------------------------------------------------------------------------------------------------------------------------------------------------------------------------------------------------------------------------------------------------------------------------------------------------------------------------------------------------------------------------------------------------------------------------------------------------------------------------------------------------------------------------------------------------------------------------------------------|----------------------------------------------------------------------------------------------------------------------------------------------------------------------------------------------------------------------------------------------------------------------------------------------------------------|
| <ul style="list-style-type: none"> <li>Age between 18 and 65 years</li> <li>Normal or corrected to normal vision</li> <li>Signed written informed consent</li> <li>Signed consent for data security</li> </ul>               |                                                                                                                                                               | <ul style="list-style-type: none"> <li>Pregnancy</li> <li>Positive alcohol test</li> <li>Common exclusion criteria for MRI (e.g., metal, claustrophobia, epilepsy, adiposity)</li> <li>Suicidality</li> <li>Severe cognitive impairments (e.g., dementia)</li> <li>Severe physical illness</li> <li>Neurological disorders, history of brain injury</li> <li>Therapy with methylphenidate within the last 8 weeks</li> <li>Other mental disorders, except for mild or moderate anxiety-, adaptation-, post-traumatic stress-, personality-, attention deficit / hyperactivity disorders</li> </ul> |                                                                                                                                                                                                                                                                                                                |
| AUD                                                                                                                                                                                                                          | TUD                                                                                                                                                           | AUD                                                                                                                                                                                                                                                                                                                                                                                                                                                                                                                                                                                                | TUD                                                                                                                                                                                                                                                                                                            |
| <ul style="list-style-type: none"> <li>AUD according to DSM-5 (more than 3 fulfilled criteria)</li> <li>Currently in therapy for AUD (in-patient or outpatient therapy)</li> <li>Abstinence from alcohol &gt; 72h</li> </ul> | <ul style="list-style-type: none"> <li>TUD according to DSM-5 (more than 3 fulfilled criteria)</li> <li>Participation in smoking cessation therapy</li> </ul> | <ul style="list-style-type: none"> <li>Other Axis I mental disorder except for mild, moderate or remitted depression, other substance use disorders if AUD is still the main diagnosis</li> <li>Severe withdrawal symptoms (CIWA-Ar &gt; 7; Sullivan et al. 1989)</li> <li>Psychotropic medication within the last 14 days except for antidepressants or soporific and intake of medication for treating withdrawal effects until 3 days prior to study participation</li> </ul>                                                                                                                   | <ul style="list-style-type: none"> <li>Other Axis I mental disorder except for mild or remitted depression, other mild substance use disorders (i.e., max. of 3 fulfilled DSM-5 criteria in the last 12 months)</li> <li>Psychotropic medication within the last 14 days except for antidepressants</li> </ul> |

**Note:** AUD = Alcohol use disorder; TUD = Tobacco use disorder; DSM = Diagnostic and Statistical Manual of Mental Disorders; MRI = Magnetic resonance imaging

Table 2: Self-rating questionnaires.

| Questionnaire                                               | Short term | Measurement Aim                                  | Reference |
|-------------------------------------------------------------|------------|--------------------------------------------------|-----------|
| Goal attainment scale                                       | GAS        | Abstinence-related goals                         | [70]      |
| Rosenberg Scale                                             |            | Self-esteem                                      | [71]      |
| General Self-Efficacy Scale                                 | GSE        | Self-efficacy                                    | [72]      |
| Perceived Social Support Questionnaire                      | F-SozU     | Perceived social support                         | [73]      |
| Habitual Subjective Well-Being Questionnaire                | SWLS       | Psychological well-being                         | [74]      |
| Satisfaction with Life Scale                                | SWLS       | Life satisfaction                                | [75]      |
| Positive and Negative Affect Schedule                       | PANAS      | Affect                                           | [76]      |
| State-Trait Anxiety Inventory                               |            | Anxiety                                          | [77]      |
|                                                             | STAI X2    | Personality trait                                |           |
|                                                             | STAI X1    | Temporary state                                  |           |
| Beck Depression Inventory II                                | BDI II     | Depression                                       | [78, 79]  |
| Percived Stress Scale                                       | PSS        | Perceived stress                                 | [80]      |
| Barratt Impulsiveness Scale                                 | BIS-15     | Impulsivity                                      | [64, 65]  |
| Adult ADHD Self-Report Scale-V1.1 Symptoms Checklist        | ASRS-V1.1  | ADHD symptoms                                    | [81]      |
| ADHD Self-Rating Scale                                      | ADHD-SB    | ADHD symptoms                                    | [82]      |
| Creature of Habit Scale                                     | COHS       | Automatic behaviour                              | [83]      |
| Self-Report Habit Index                                     | SRHI       | Substance-related habits                         | [84]      |
| Fagerström Test for Nicotine Dependence                     | FTND       | Intensity of physical nicotine dependence        | [85]      |
| Alcohol Use Disorder Identification Test                    | AUDIT      | Screening for alcohol use disorder               | [86]      |
| Clinical Institute Withdrawal Assessment for Alcohol Form90 | CIWA-Ar    | Alcohol withdrawal symptoms                      | [87]      |
|                                                             |            | Alcohol or nicotine consumption                  | [88]      |
| Visual Analog Craving Scales                                | VACS       | Alcohol or nicotine craving                      | [89]      |
| Obsessive Compulsive Drinking Scale                         | OCDS-G     | Thoughts about alcohol and drinking behaviour    | [90]      |
| Alcohol Craving Questionnaire                               | ACQ-SF-R   | Acute alcohol craving                            | [91]      |
| Craving Automated Scale for Alcohol                         | CAS-A      | Alcohol craving and automated drinking behaviour | [92]      |
| Alcohol Urge Questionnaire                                  | AUQ        | Alcohol urges                                    | [93]      |
| Alcohol Dependence Scale                                    | ADS        | Severity of alcohol dependence                   | [94]      |
| Questionnaire on Smoking Urges                              | QSU        | Smoking urges                                    | [95]      |
| Craving Automated Scale for Cigarette Smoking               | CAS-CS     | Nicotine craving and automated smoking behaviour | [60]      |
| Obsessive Compulsive Smoking Scale                          | OCSS       | Thoughts about tobacco and smoking behaviour     | [96]      |
| Smoking Consequences Questionnaire for Adults               | SCQ-A      | Smoking outcome expectancies                     | [97]      |
| Wisconsin Smoking Withdrawal Scale                          | WSWS       | Nicotine withdrawal symptoms                     | [98]      |

**Note:** ADHD = Attention Deficit Hyperactivity Disorder.



Table 3: Schedule of measurement during study participation.

| Measurement time point                         | S        |          | T1       |          | T2       |          | FU1      |          | FU2      |          | T3       |          |
|------------------------------------------------|----------|----------|----------|----------|----------|----------|----------|----------|----------|----------|----------|----------|
| Baseline                                       | T        | A        | T        | A        | T        | A        | T        | A        | T        | A        | T        | A        |
| Demographic information                        | x        | x        | x        | x        |          |          |          |          |          |          |          |          |
| Current medication*                            | x        | x        | x        | x        | x        | x        |          |          |          |          | x        | x        |
| Current somatic or mental conditions*          | x        | x        | x        | x        | x        | x        |          |          |          |          | x        | x        |
| Structured Clinical Interview (SCID-5-CV)      |          |          | x        | x        |          |          |          |          |          |          |          |          |
| Smoking history                                |          |          | x        | x        |          |          |          |          |          |          |          |          |
| Current smoking behavior*                      |          |          |          |          | x        |          | x        |          | x        |          | x        | x        |
| Smoking Assessment Interview                   |          |          | x        |          | x        |          |          |          |          |          | x        |          |
| (Current) drinking behavior*                   |          | x        | x        |          | x        |          | x        |          | x        |          | x        | x        |
| CIWA-Ar                                        |          |          | x        |          | x        |          |          |          |          |          |          |          |
| Current drug use*                              | x        | x        |          |          |          |          |          |          |          |          | x        | x        |
| Urine pregnancy and drugs screening            |          |          | x        | x        | x        | x        |          |          |          |          |          |          |
| Breath alcohol test                            |          |          | x        | x        | x        | x        |          |          |          |          |          |          |
| Breath carbon monoxide test                    |          |          | x        |          | x        |          |          |          |          |          |          |          |
| Goal attainment scaling                        |          |          | x        | x        | x        | x        |          |          |          |          |          |          |
| <b>Neuropsychology</b>                         | <b>T</b> | <b>A</b> |
| MWT-B                                          |          |          | x        |          |          |          |          |          |          |          |          |          |
| LNS-Task                                       |          |          | x        |          | x        |          |          |          |          |          |          |          |
| D2-R                                           |          |          | x        | x        | x        | x        |          |          |          |          |          |          |
| IGT                                            |          |          | x        | x        | x        | x        |          |          |          |          |          |          |
| DCCS                                           |          |          | x        | x        | x        | x        |          |          |          |          |          |          |
| <b>Magnetic resonance imaging</b>              | <b>T</b> | <b>A</b> |
| Field-Map                                      |          |          | x        | x        | x        | x        |          |          |          |          |          |          |
| Resting-State                                  |          |          | x        | x        | x        | x        |          |          |          |          |          |          |
| NICUETINE                                      |          |          | x        | x        | x        | x        |          |          |          |          |          |          |
| N-Back                                         |          |          | x        | x        | x        | x        |          |          |          |          |          |          |
| SST                                            |          |          | x        | x        | x        | x        |          |          |          |          |          |          |
| ALCUE                                          |          |          | x        | x        | x        | x        |          |          |          |          |          |          |
| MPRAGE                                         |          |          | x        | x        | x        | x        |          |          |          |          |          |          |
| <b>General questionnaires</b>                  | <b>T</b> | <b>A</b> |
| PANAS                                          |          |          | x        | x        | x        | x        | x        | x        | x        | x        | x        | x        |
| HSWBS                                          |          |          | x        | x        | x        | x        |          |          |          |          |          |          |
| GSE                                            |          |          | x        | x        |          |          |          |          |          |          |          |          |
| Rosenberg                                      |          |          | x        | x        |          |          |          |          |          |          |          |          |
| SWLS                                           |          |          | x        | x        | x        | x        |          |          |          |          | x        | x        |
| FSozU                                          |          |          | x        | x        |          |          |          |          |          |          |          |          |
| <b>Questionnaires - depression and anxiety</b> | <b>T</b> | <b>A</b> |
| BDI II                                         |          |          | x        | x        | x        | x        |          |          |          |          | x        | x        |
| PSS                                            |          |          | x        | x        | x        | x        |          |          |          |          | x        | x        |
| STAI (X1)                                      |          |          | x        | x        | x        | x        |          |          |          |          | x        | x        |
| STAI (X2)                                      |          |          | x        | x        |          |          |          |          |          |          |          |          |
| <b>Questionnaires – impulsivity and ADHD</b>   | <b>T</b> | <b>A</b> |
| ASRS-v1.1                                      |          |          | x        | x        | x        | x        |          |          |          |          |          |          |
| ADHS-SB                                        |          |          | x        |          | x        |          |          |          |          |          |          |          |
| BIS-15                                         |          |          | x        | x        | x        | x        |          |          |          |          | x        | x        |
| COHS                                           |          |          | x        | x        |          |          |          |          |          |          |          |          |
| <b>Questionnaires - alcohol</b>                | <b>T</b> | <b>A</b> |
| ACQ-SF-R                                       |          |          | x        |          | x        |          |          |          |          |          | x        |          |
| ADS                                            |          |          | x        |          |          |          |          |          |          |          |          |          |
| AUDIT                                          | x        | x        |          |          |          |          |          |          |          |          |          |          |
| AUQ                                            |          |          | x        |          | x        |          | x        |          | x        |          |          |          |
| CAS-A                                          |          |          | x        |          | x        |          |          |          |          |          | x        |          |

|                                 |  |          |          |          |          |          |          |          |          |          |          |
|---------------------------------|--|----------|----------|----------|----------|----------|----------|----------|----------|----------|----------|
| OCDS-G                          |  |          | x        |          | x        |          | x        |          | x        |          | x        |
| SRHI (alcohol)                  |  |          | x        |          | x        |          |          |          |          |          | x        |
| VACS for MRI (alcohol)          |  |          | x        | x        | x        | x        |          |          |          |          |          |
| <b>Questionnaires - tobacco</b> |  | <b>T</b> | <b>A</b> |
| OCSS                            |  |          |          | x        |          | x        |          | x        |          | x        |          |
| CAS-CS                          |  |          |          | x        | x        | x        |          |          |          |          | x        |
| QSU                             |  |          |          | x        |          | x        |          | x        |          | x        |          |
| SCQ-A                           |  |          |          | x        |          | x        |          |          |          |          | x        |
| WSWS                            |  |          |          | x        |          | x        |          |          |          |          | x        |
| SRHI (tobacco)                  |  |          |          | x        |          | x        |          |          |          |          | x        |
| FTND                            |  |          |          | x        | x        | x        |          |          |          |          | x        |
| VACS for MRI (tobacco)          |  |          |          | x        |          | x        |          |          |          |          |          |

**Note:** S = Screening measurement, T1 = baseline and MRI assessment, T2 = MRI assessment, FU = monthly follow-ups via telephone; T3 = final follow-up via telephone; T = Tobacco use disorder; A = Alcohol use disorder; \* self-report.

SCID = Structured Clinical Interview for DSM-5; AUDIT = Alcohol Use Disorder Identification Test; CIWA-AR = Clinical Institute Withdrawal Assessment; MWT-B = Multiple-choice vocabulary test (German version); LNS = Letter-Number-Sequencing (Wechsler-Memory Scale-3); D2-R = d2-R Test of Attention; IGT = Iowa Gambling Task; DCCS = Dimensional Change Card Sort; NICUETINE = fMRI tobacco cue-reactivity task; N-Back = N-back fMRI task; SST = Stop-Signal-Reaction-Time Task for fMRI; ALCUE = fMRI alcohol cue-reactivity task; MPRAGE = Magnetization Prepared - RApid Gradient Echo sequence; PANAS = Positive and Negative Affect Schedule; HSWBS = Habitual Subjective Well-Being Questionnaire; GSE = General Self-Efficacy Scale; Rosenberg = Rosenberg self-esteem scale; SWLS = Satisfaction with Life Scale; FSozU = Perceived Social Support Questionnaire; BDI-II = Beck-Depression Inventory; PSS = Perceived Stress Scale; STAI (X1,X2) = State / Trait Anxiety Inventory; ASRS-v1.1 = Adult ADHD Self-Report Scale Symptom Checklist, Part A; ADHS-SB = ADHD Self-rating Scale; BIS-15 = Barrett Impulsiveness Scale; COHS = Creature of Habit Scale; ACQ-SF-R = Alcohol Craving Questionnaire – short form revised; ADS = Alcohol Dependence Scale; AUQ = Alcohol Urge Questionnaire; CAS-A = Craving Automated Scale for Alcohol; OCDS-G = Obsessive Compulsive Drinking Scale - German; SRHI = Self-Report Habit Index (German translation, adapted for alcohol); VACS = Visual Analog Craving Scales for alcohol before and after fMRI for alcohol; OCSS = Obsessive Compulsive Smoking Scale; CAS-CS = Craving Automated Scale for Cigarette Smoking; QSU = Questionnaire on Smoking Urges; SCQ-A = Smoking Consequences Questionnaire for Adults; WSWS = Wisconsin Smoking Withdrawal Scale; SRHI = Self-Report Habit Index (tobacco); FTND = Fagerström Test for Nicotine Dependence; VACS = Visual Analog Craving Scales before and after fMRI for tobacco.

## Figure captions

**Figure 1: Study design.** Following a screening, all participants will undergo a baseline (T1) appointment with diagnostic interviews, questionnaires, and functional magnetic resonance imaging measurements. Participants with tobacco or alcohol use disorder will be randomly assigned to the control group or intervention group. All participants will receive their respective treatment as usual. The intervention groups will additionally receive chess-based cognitive remediation training (CB-CRT). After the 6 week long treatment as usual with/without CB-CRT (T2), the same measurements as for T1 will take place. During the follow-up period of 12 weeks, all participants will be contacted via telephone once a month.

**Figure 2: Examples of the chess-based cognitive remediation training. 2a: Selective attention.** Participants are asked to count the number of white knights on white squares (right answer: 5, squares: b1, b7, c6, d7, f1). During the training, participants receive 6 boards within a maximum of three minutes. **2b: Short term memory.** Participants are focused on the board and see the position for a few seconds up to one minute. Afterwards, the instructor asks the participants to reconstruct the position. Participants are asked to go to the front of the group and rebuild the position. **2c: Executive functions, planification skills.** Participants must find out the shortest route the knight can go to capture the pawn. The knight must not stop on any square controlled by the rooks. The participant is asked to announce the number of moves before showing them on the board (correct answer: 4 moves – g5-e6-c7-b5-c3 or g5-e6-d4-b5-c3).

1  
2  
3  
4  
5  
6  
7  
8  
9  
10  
11  
12  
13  
14  
15  
16  
17  
18  
19  
20  
21  
22  
23  
24  
25  
26  
27  
28  
29  
30  
31  
32  
33  
34  
35  
36  
37  
38  
39  
40  
41  
42  
43  
44  
45  
46  
47  
48  
49  
50  
51  
52  
53  
54  
55  
56  
57  
58  
59  
60

For peer review only

## References

- 1 Peacock A, Leung J, Larney S, et al. Global statistics on alcohol, tobacco and illicit drug use: 2017 status report. *Addiction*. 2018;113(10):1905-26.
- 2 Atzendorf J, Rauschert C, Seitz NN, Lochbuhler K, Kraus L. The Use of Alcohol, Tobacco, Illegal Drugs and Medicines. *Dtsch Arztebl Int*. 2019;116(35-36):577-84.
- 3 Konnopka A, Konig HH. Direct and indirect costs attributable to alcohol consumption in Germany. *Pharmacoeconomics*. 2007;25(7):605-18.
- 4 Neubauer S, Welte R, Beiche A, Koenig HH, Buesch K, Leidl R. Mortality, morbidity and costs attributable to smoking in Germany: update and a 10-year comparison. *Tob Control*. 2006;15(6):464-71.
- 5 Newcomb PA, Carbone PP. The health consequences of smoking. *Cancer. Med Clin North Am*. 1992;76(2):305-31.
- 6 Moos RH, Moos BS. Rates and predictors of relapse after natural and treated remission from alcohol use disorders. *Addiction*. 2006;101(2):212-22.
- 7 Miller WR, Walters ST, Bennett ME. How effective is alcoholism treatment in the United States? *Journal of studies on alcohol*. 2001;62(2):211-20.
- 8 Anton RF, O'Malley SS, Ciraulo DA, et al. Combined pharmacotherapies and behavioral interventions for alcohol dependence: the COMBINE study: a randomized controlled trial. *Jama*. 2006;295(17):2003-17.
- 9 Hughes JR, Peters EN, Naud S. Relapse to smoking after 1 year of abstinence: a meta-analysis. *Addict Behav*. 2008;33(12):1516-20.
- 10 von der Goltz C, Kiefer F. Learning and memory in the aetiopathogenesis of addiction: future implications for therapy? *Eur Arch Psychiatry Clin Neurosci*. 2009;259 Suppl 2:S183-7.
- 11 West R. Tobacco smoking: Health impact, prevalence, correlates and interventions. *Psychology & Health*. 2017;32(8):1018-36.
- 12 Sinha R. New findings on biological factors predicting addiction relapse vulnerability. *Current psychiatry reports*. 2011;13(5):398-405.
- 13 Nebe S, Kroemer NB, Schad DJ, et al. No association of goal-directed and habitual control with alcohol consumption in young adults. *Addiction Biology*. 2018;23(1):379-93.
- 14 Hogarth L, Lam-Cassettari C, Pacitti H, et al. Intact goal-directed control in treatment-seeking drug users indexed by outcome-devaluation and Pavlovian to instrumental transfer: critique of habit theory. *European Journal of Neuroscience*. 2019;50(3):2513-25.
- 15 Hogarth L. Addiction is driven by excessive goal-directed drug choice under negative affect: translational critique of habit and compulsion theory. *Neuropsychopharmacology*. 2020;45(5):720-35.
- 16 Garavan H, Hester R. The role of cognitive control in cocaine dependence. *Neuropsychol Rev*. 2007;17(3):337-45.
- 17 Sjoerds Z, de Wit S, van den Brink W, et al. Behavioral and neuroimaging evidence for overreliance on habit learning in alcohol-dependent patients. *Translational Psychiatry*. 2013;3(12):e337-e.
- 18 Ersche KD, Gillan CM, Jones PS, et al. Carrots and sticks fail to change behavior in cocaine addiction. *Science (New York, NY)*. 2016;352(6292):1468-71.
- 19 Sebold M, Deserno L, Nebe S, et al. Model-Based and Model-Free Decisions in Alcohol Dependence. *Neuropsychobiology*. 2014;70(2):122-31.
- 20 Bechara A. Decision making, impulse control and loss of willpower to resist drugs: a neurocognitive perspective. *Nat Neurosci*. 2005;8(11):1458-63.
- 21 Kirby KN, Petry NM. Heroin and cocaine abusers have higher discount rates for delayed rewards than alcoholics or non-drug-using controls. *Addiction*. 2004;99(4):461-71.
- 22 Yucel M, Lubman DI, Solowij N, Brewer WJ. Understanding drug addiction: a neuropsychological perspective. *Aust N Z J Psychiatry*. 2007;41(12):957-68.
- 23 Berkman ET, Falk EB, Lieberman MD. In the trenches of real-world self-control: neural correlates of breaking the link between craving and smoking. *Psychol Sci*. 2011;22(4):498-506.

- 1  
2  
3 24 Vollstädt-Klein S, Hermann D, Rabinstein J, et al. Increased activation of the ACC during a spatial  
4 working memory task in alcohol-dependence versus heavy social drinking. *Alcohol Clin Exp Res*.  
5 2010;34(5):771-6.  
6 25 Hamonniere T, Varescon I. Metacognitive beliefs in addictive behaviours: A systematic review.  
7 *Addictive behaviors*. 2018;85:51-63.  
8 26 Pintrich PR. The Role of Metacognitive Knowledge in Learning, Teaching, and Assessing. *Theory*  
9 *Into Practice*. 2002;41(4):219-25.  
10 27 Fleur DS, Bredeweg B, van den Bos W. Metacognition: ideas and insights from neuro- and  
11 educational sciences. *npj Science of Learning*. 2021;6(1):13.  
12 28 Cella M, Reeder C, Wykes T. Group cognitive remediation for schizophrenia: Exploring the role of  
13 therapist support and metacognition. *Psychol Psychother*. 2015.  
14 29 Wykes T, Spaulding WD. Thinking about the future cognitive remediation therapy--what works  
15 and could we do better? *Schizophr Bull*. 2011;37 Suppl 2:S80-90.  
16 30 Kiluk BD, Nich C, Babuscio T, Carroll KM. Quality versus quantity: acquisition of coping skills  
17 following computerized cognitive-behavioral therapy for substance use disorders. *Addiction*.  
18 2010;105(12):2120-7.  
19 31 Danner UN, Dingemans AE, Steinglass J. Cognitive remediation therapy for eating disorders. *Curr*  
20 *Opin Psychiatry*. 2015;28(6):468-72.  
21 32 Cella M, Reeder C, Wykes T. Lessons learnt? The importance of metacognition and its implications  
22 for Cognitive Remediation in schizophrenia. *Front Psychol*. 2015;6:1259.  
23 33 Cella M, Edwards C, Swan S, Elliot K, Reeder C, Wykes T. Exploring the effects of cognitive  
24 remediation on metacognition in people with schizophrenia. *Journal of Experimental*  
25 *Psychopathology*. 2019;10(2):2043808719826846.  
26 34 Montemagni C, Del Favero E, Riccardi C, et al. Effects of Cognitive Remediation on Cognition,  
27 Metacognition, and Social Cognition in Patients With Schizophrenia. *Front Psychiatry*.  
28 2021;12:649737.  
29 35 Bates ME, Buckman JF, Nguyen TT. A role for cognitive rehabilitation in increasing the  
30 effectiveness of treatment for alcohol use disorders. *Neuropsychol Rev*. 2013;23(1):27-47.  
31 36 Caetano T, Pinho MS, Ramadas E, Clara C, Areosa T, Dixe MDA. Cognitive Training Effectiveness on  
32 Memory, Executive Functioning, and Processing Speed in Individuals With Substance Use Disorders: A  
33 Systematic Review. *Front Psychol*. 2021;12:730165.  
34 37 Sofuoglu M, DeVito EE, Waters AJ, Carroll KM. Cognitive Function as a Transdiagnostic Treatment  
35 Target in Stimulant Use Disorders. *J Dual Diagn*. 2016;12(1):90-106.  
36 38 Nixon SJ, Lewis B. Cognitive training as a component of treatment of alcohol use disorder: A  
37 review. *Neuropsychology*. 2019;33(6):822-41.  
38 39 Khemiri L, Brynte C, Stunkel A, Klingberg T, Jayaram-Lindström N. Working Memory Training in  
39 Alcohol Use Disorder: A Randomized Controlled Trial. *Alcoholism, clinical and experimental research*.  
40 2019;43(1):135-46.  
41 40 Bernardin F, Maheut-Bosser A, Paille F. Cognitive Impairments in Alcohol-Dependent Subjects.  
42 *Frontiers in Psychiatry*. 2014;5(78).  
43 41 Spada MM, Caselli G, Wells A. A Triphasic Metacognitive Formulation of Problem Drinking. *Clinical*  
44 *Psychology & Psychotherapy*. 2013;20(6):494-500.  
45 42 Blasco-Fontecilla H, Gonzalez-Perez M, Garcia-Lopez R, et al. Efficacy of chess training for the  
46 treatment of ADHD: A prospective, open label study. *Rev Psiquiatr Salud Ment*. 2015.  
47 43 Nour ElDaou BM, El-Shamieh SI. The Effect Of Playing Chess On The Concentration Of ADHD  
48 Students In The 2nd Cycle. *Procedia - Social and Behavioral Sciences*. 2015;192:638 – 43.  
49 44 Heinrichs RW, Zakzanis KK. Neurocognitive deficit in schizophrenia: a quantitative review of the  
50 evidence. *Neuropsychology*. 1998;12(3):426-45.  
51 45 Demily C, Cavezian C, Desmurget M, Berquand-Merle M, Chambon V, Franck N. The game of chess  
52 enhances cognitive abilities in schizophrenia. *Schizophr Res*. 2009;107(1):112-3.  
53 46 Sala G, Gobet F. Does chess instruction improve mathematical problem-solving ability? Two  
54 experimental studies with an active control group. *Learn Behav*. 2017;45(4):414-21.  
55  
56  
57  
58  
59  
60

- 1  
2  
3 47 First MB. Structured Clinical Interview for the DSM(SCID). In: Cautin RL, Lilienfeld SO, editors. The  
4 Encyclopedia of Clinical Psychology 2015. p. 1-6.
- 5 48 Batra A, Kiefer F, Andreas S, et al. S3-Leitlinie „Rauchen und Tabakabhängigkeit: Screening,  
6 Diagnostik und Behandlung“. *Sucht*. 2021.
- 7 49 Stead LF, Carroll AJ, Lancaster T. Group behaviour therapy programmes for smoking cessation.  
8 *Cochrane Database of Systematic Reviews*. 2017(3).
- 9 50 Batra A. Tabakentwöhnung. Buchkremer G, editor. 70565 Stuttgart: W. Kohlhammer Verlag; 2012.
- 10 51 Kiefer F, Batra A, Bischof G, et al. S3-Leitlinie „Screening, Diagnose und Behandlung  
11 alkoholbezogener Störungen“. *Sucht*. 2021.
- 12 52 Tombaugh TN. Trail Making Test A and B: Normative data stratified by age and education.  
13 *Archives of Clinical Neuropsychology*. 2004;19(2):203-14.
- 14 53 Berg WK, Byrd DL. The Tower of London spatial problem-solving task: Enhancing clinical and  
15 research implementation. *Journal of Clinical and Experimental Neuropsychology*. 2002;24(5):586-604.
- 16 54 Kent P. The Evolution of the Wechsler Memory Scale: A Selective Review. *Appl Neuropsychol*  
17 *Adult*. 2013;20(4):277-91.
- 18 55 Bechara A, Damasio AR, Damasio H, Anderson SW. Insensitivity to future consequences following  
19 damage to human prefrontal cortex. *Cognition*. 1994;50(1-3):7-15.
- 20 56 Zelazo PD, Anderson JE, Richler J, et al. NIH Toolbox Cognition Battery (CB): validation of executive  
21 function measures in adults. *J Int Neuropsychol Soc*. 2014;20(6):620-9.
- 22 57 Brickenkamp R. Aufmerksamkeits-Belastungs-Test. 9., überarbeitete und neu normierte Auflage  
23 [d2 Test of attention, 9th revised edn.]. Hogrefe V, editor. Göttingen 2002.
- 24 58 Whelan R, Conrod PJ, Poline JB, et al. Adolescent impulsivity phenotypes characterized by distinct  
25 brain networks. *Nat Neurosci*. 2012;15(6):920-5.
- 26 59 Vollstädt-Klein S, Loeber S, Kirsch M, et al. Effects of Cue-Exposure Treatment on Neural Cue  
27 Reactivity in Alcohol Dependence: A Randomized Trial. *Biol Psychiatry*. 2011;69(11):1060-6.
- 28 60 Vollstädt-Klein S, Kobiella A, Buhler M, et al. Severity of dependence modulates smokers' neuronal  
29 cue reactivity and cigarette craving elicited by tobacco advertisement. *Addiction biology*.  
30 2011;16(1):166-75.
- 31 61 Charlet K, Beck A, Jorde A, et al. Increased neural activity during high working memory load  
32 predicts low relapse risk in alcohol dependence. *Addiction biology*. 2014;19(3):402-14.
- 33 62 Xu J, Moeller S, Auerbach EJ, et al. Evaluation of slice accelerations using multiband echo planar  
34 imaging at 3 T. *NeuroImage*. 2013;83:991-1001.
- 35 63 Whelan R, Conrod PJ, Poline JB, et al. Adolescent impulsivity phenotypes characterized by distinct  
36 brain networks. *Nat Neurosci*. 2012;15(6):920-5.
- 37 64 Meule A, Vögele C, Kübler A. Psychometrische Evaluation der deutschen Barratt Impulsiveness  
38 Scale – Kurzversion (BIS-15). *Diagnostica*. 2011;57(3):126-33.
- 39 65 Patton JH, Stanford MS, Barratt ES. Factor structure of the Barratt impulsiveness scale. *J Clin*  
40 *Psychol*. 1995;51(6):768-74.
- 41 66 Brevers D, Bechara A, Cleeremans A, Noel X. Iowa Gambling Task (IGT): twenty years after –  
42 gambling disorder and IGT. *Frontiers in Psychology*. 2013;4(665).
- 43 67 Bates ME, Lemay EP. The d2 Test of Attention: Construct validity and extensions in scoring  
44 techniques. *Journal of the International Neuropsychological Society*. 2004;10(3):392-400.
- 45 68 Faul F, Erdfelder E, Lang A-G, Buchner A. G\*Power 3: A flexible statistical power analysis program  
46 for the social, behavioral, and biomedical sciences. *Behavior research methods*. 2007;39(2):175-91.
- 47 69 Sala G, Gobet F. Do the benefits of chess instruction transfer to academic and cognitive skills? A  
48 meta-analysis. *Educational Research Review*. 2016;18:46-57.
- 49 70 Kiresuk TJ, Lund SH, Larsen NE. Measurement of goal attainment in clinical and health care  
50 programs. *Drug Intell Clin Pharm*. 1982;16(2):145-53.
- 51 71 Rosenberg MJ. Society and the adolescent self-image. Princeton: Princeton University Press; 1965.
- 52 72 Schwarzer RJ, M. (Hrsg.). Skalen zur Erfassung von Lehrer- und Schülermerkmalen.  
53 Dokumentation der psychometrischen Verfahren im Rahmen der Wissenschaftlichen Begleitung  
54 des



- 1  
2  
3 Modellversuchs Selbstwirksame Schulen. Berlin: Freie Universität; 1999.
- 4 73 Kliem S, Mossle T, Rehbein F, Hellmann DF, Zenger M, Brahler E. A brief form of the Perceived  
5 Social Support Questionnaire (F-SozU) was developed, validated, and standardized. *J Clin Epidemiol*.  
6 2015;68(5):551-62.
- 7 74 Pouwer F, Snoek FJ, van der Ploeg HM, Ader HJ, Heine RJ. The well-being questionnaire: evidence  
8 for a three-factor structure with 12 items (W-BQ12). *Psychol Med*. 2000;30(2):455-62.
- 9 75 Diener E, Emmons RA, Larsen RJ, Griffin S. The Satisfaction With Life Scale. *J Pers Assess*.  
10 1985;49(1):71-5.
- 11 76 Watson D, Clark LA, Tellegen A. Development and validation of brief measures of positive and  
12 negative affect: the PANAS scales. *J Pers Soc Psychol*. 1988;54(6):1063-70.
- 13 77 Laux L, Glanzmann P, Schaffner P, Spielberger C. STAI. *State-Trait-Angstinventar Göttingen: Beltz*  
14 *Test GmbH*. 1981.
- 15 78 Hautzinger M, Bailer M, Worrall H, Keller F. Das Beck-Depressions-Inventar (BDI). Überarbeitet  
16 und ergänzte Neuauflage. Bern: Hans Huber; 1995.
- 17 79 Kühner C, Bürger C, Keller F, Hautzinger M. [Reliability and validity of the Revised Beck Depression  
18 Inventory (BDI-II). Results from German samples]. *Der Nervenarzt*. 2007;78(6):651-6.
- 19 80 Cohen S, Kamarck T, Mermelstein R. A global measure of perceived stress. *J Health Soc Behav*.  
20 1983;24(4):385-96.
- 21 81 Reyes MM, Schneekloth TD, Hitschfeld MJ, Geske JR, Atkinson DL, Karpayk VM. The Clinical Utility  
22 of ASRS-v1.1 for Identifying ADHD in Alcoholics Using PRISM as the Reference Standard. *Journal of*  
23 *Attention Disorders*. 2016;23(10):1119-25.
- 24 82 Rösler M, Retz W, Retz-Junginger P, et al. [Tools for the diagnosis of attention-deficit/hyperactivity  
25 disorder in adults. Self-rating behaviour questionnaire and diagnostic checklist]. *Der Nervenarzt*.  
26 2004;75(9):888-95.
- 27 83 Ersche KD, Lim TV, Ward LHE, Robbins TW, Stoohill J. Creature of Habit: A self-report measure of  
28 habitual routines and automatic tendencies in everyday life. *Pers Individ Dif*. 2017;116:73-85.
- 29 84 Verplanken B, Orbell S. Reflections on Past Behavior: A Self-Report Index of Habit Strength.  
30 *Journal of Applied Social Psychology*. 2003;33:1313-30.
- 31 85 Heatherton TF, Kozlowski LT, Frecker RC, Fagerstrom KO. The Fagerstrom Test for Nicotine  
32 Dependence: a revision of the Fagerstrom Tolerance Questionnaire. *British journal of addiction*.  
33 1991;86(9):1119-27.
- 34 86 Babor TF, Higgins-Biddle JC, Saunders JB, Monteiro MG. Geneva: World Health Organization. 2001.  
35 Available from: <http://www.who.int/iris/handle/10665/67205>.
- 36 87 Sullivan JT, Sykora K, Schneiderman J, Naranjo CA, Sellers EM. Assessment of alcohol withdrawal:  
37 the revised clinical institute withdrawal assessment for alcohol scale (CIWA-Ar). *British journal of*  
38 *addiction*. 1989;84(11):1353-7.
- 39 88 Scheurich A, Muller MJ, Angheliescu I, et al. Reliability and validity of the form 90 interview. *Eur*  
40 *Addict Res*. 2005;11(1):50-6.
- 41 89 Sayette MA, Shiffman S, Tiffany ST, Niaura RS, Martin CS, Shadel WG. The measurement of drug  
42 craving. *Addiction*. 2000;95 Suppl 2:S189-210.
- 43 90 Nakovics H, Diehl A, Croissant B, Mann K. Modifications of the Obsessive Compulsive Drinking  
44 Scale (OCDS-G) for use in longitudinal studies. *Addict Behav*. 2008;33(10):1276-81.
- 45 91 Singleton T, Henningfield. Development and validation of a new questionnaire to assess craving  
46 for alcohol. *Problems of Drug Dependence, 1994*. 1995;11:1.
- 47 92 Vollstadt-Klein S, Lemenager T, Jorde A, Kiefer F, Nakovics H. Development and validation of the  
48 craving automated scale for alcohol. *Alcoholism, clinical and experimental research*. 2015;39(2):333-  
49 42.
- 50 93 Bohn MJ, Krahn DD, Staehler BA. Development and initial validation of a measure of drinking  
51 urges in abstinent alcoholics. *Alcoholism, clinical and experimental research*. 1995;19(3):600-6.
- 52 94 Skinner HA, Allen BA. Alcohol dependence syndrome: measurement and validation. *Journal of*  
53 *abnormal psychology*. 1982;91(3):199-209.
- 54  
55  
56  
57  
58  
59  
60



- 1  
2  
3 95 Tiffany ST, Drobes DJ. The development and initial validation of a questionnaire on smoking urges.  
4 *Br J Addict.* 1991;86(11):1467-76.  
5 96 Hitsman B, Shen BJ, Cohen RA, et al. Measuring smoking-related preoccupation and compulsive  
6 drive: evaluation of the obsessive compulsive smoking scale. *Psychopharmacology (Berl).*  
7 2010;211(4):377-87.  
8 97 Rash CJ, Copeland AL. The Brief Smoking Consequences Questionnaire-Adult (BSCQ-A):  
9 development of a short form of the SCQ-A. *Nicotine Tob Res.* 2008;10(11):1633-43.  
10 98 Castro Y, Kendzor DE, Businelle MS, et al. Structural and predictive equivalency of the Wisconsin  
11 Smoking Withdrawal Scale across three racial/ethnic groups. *Nicotine Tob Res.* 2011;13(7):548-55.  
12  
13  
14  
15  
16  
17  
18  
19  
20  
21  
22  
23  
24  
25  
26  
27  
28  
29  
30  
31  
32  
33  
34  
35  
36  
37  
38  
39  
40  
41  
42  
43  
44  
45  
46  
47  
48  
49  
50  
51  
52  
53  
54  
55  
56  
57  
58  
59  
60

For peer review only

1  
2  
3  
4  
5  
6  
7  
8  
9  
10  
11  
12  
13  
14  
15  
16  
17  
18  
19  
20  
21  
22  
23  
24  
25  
26  
27  
28  
29  
30  
31  
32  
33  
34  
35  
36  
37  
38  
39  
40  
41  
42  
43  
44  
45  
46  
47  
48  
49  
50  
51  
52  
53  
54  
55  
56  
57  
58  
59  
60



Figure 1: Study design.



Figure 2: Examples of the chess-based cognitive remediation training.

98x38mm (300 x 300 DPI)

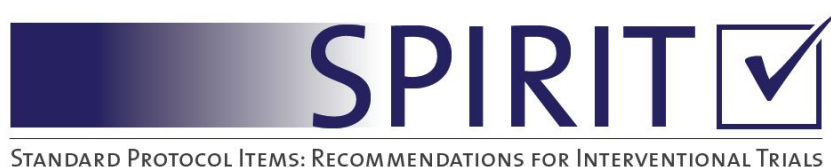

STANDARD PROTOCOL ITEMS: RECOMMENDATIONS FOR INTERVENTIONAL TRIALS

SPIRIT 2013 Checklist accompanying the study protocol 'Effects of chess-based cognitive remediation training as therapy add-on in alcohol and tobacco use disorders: protocol of a randomized, controlled clinical fMRI trial'

| Section/item                      | Page    | Description                                                                                                                                                                                                                                                                              |
|-----------------------------------|---------|------------------------------------------------------------------------------------------------------------------------------------------------------------------------------------------------------------------------------------------------------------------------------------------|
| <b>Administrative information</b> |         |                                                                                                                                                                                                                                                                                          |
| Title                             | 1       | Descriptive title identifying the study design, population, interventions, and, if applicable, trial acronym                                                                                                                                                                             |
| Trial registration                | 2       | Trial identifier and registry name. If not yet registered, name of intended registry                                                                                                                                                                                                     |
|                                   | n/a     | All items from the World Health Organization Trial Registration Data Set                                                                                                                                                                                                                 |
| Protocol version                  | n/a     | Date and version identifier                                                                                                                                                                                                                                                              |
| Funding                           | 16      | Sources and types of financial, material, and other support                                                                                                                                                                                                                              |
| Roles and responsibilities        | 1, 16   | Names, affiliations, and roles of protocol contributors                                                                                                                                                                                                                                  |
|                                   | n/a     | Name and contact information for the trial sponsor                                                                                                                                                                                                                                       |
|                                   | 16      | Role of study sponsor and funders, if any, in study design; collection, management, analysis, and interpretation of data; writing of the report; and the decision to submit the report for publication, including whether they will have ultimate authority over any of these activities |
|                                   | n/a     | Composition, roles, and responsibilities of the coordinating centre, steering committee, endpoint adjudication committee, data management team, and other individuals or groups overseeing the trial, if applicable (see Item 21a for data monitoring committee)                         |
| <b>Introduction</b>               |         |                                                                                                                                                                                                                                                                                          |
| Background and rationale          | 4-6     | Description of research question and justification for undertaking the trial, including summary of relevant studies (published and unpublished) examining benefits and harms for each intervention                                                                                       |
|                                   | 6       | Explanation for choice of comparators                                                                                                                                                                                                                                                    |
| Objectives                        | 6,13-14 | Specific objectives or hypotheses                                                                                                                                                                                                                                                        |

|    |                                                           |                   |                                                                       |
|----|-----------------------------------------------------------|-------------------|-----------------------------------------------------------------------|
| 1  |                                                           |                   |                                                                       |
| 2  | Trial design                                              | 7-9               | Description of trial design including type of trial (eg, parallel     |
| 3  |                                                           |                   | group, crossover, factorial, single group), allocation ratio, and     |
| 4  |                                                           |                   | framework (eg, superiority, equivalence, noninferiority,              |
| 5  |                                                           |                   | exploratory)                                                          |
| 6  |                                                           |                   |                                                                       |
| 7  |                                                           |                   |                                                                       |
| 8  | <b>Methods: Participants, interventions, and outcomes</b> |                   |                                                                       |
| 9  |                                                           |                   |                                                                       |
| 10 | Study setting                                             | 7                 | Description of study settings (eg, community clinic, academic         |
| 11 |                                                           |                   | hospital) and list of countries where data will be collected.         |
| 12 |                                                           |                   | Reference to where list of study sites can be obtained                |
| 13 |                                                           |                   |                                                                       |
| 14 | Eligibility criteria                                      | 8, table 1        | Inclusion and exclusion criteria for participants. If applicable,     |
| 15 |                                                           |                   | eligibility criteria for study centres and individuals who will       |
| 16 |                                                           |                   | perform the interventions (eg, surgeons, psychotherapists)            |
| 17 |                                                           |                   |                                                                       |
| 18 | Interventions                                             | 8-9               | Interventions for each group with sufficient detail to allow          |
| 19 |                                                           |                   | replication, including how and when they will be administered         |
| 20 |                                                           |                   |                                                                       |
| 21 |                                                           |                   |                                                                       |
| 22 |                                                           | n/a               | Criteria for discontinuing or modifying allocated interventions for a |
| 23 |                                                           |                   | given trial participant (eg, drug dose change in response to          |
| 24 |                                                           |                   | harms, participant request, or improving/worsening disease)           |
| 25 |                                                           |                   |                                                                       |
| 26 |                                                           | n/a               | Strategies to improve adherence to intervention protocols, and        |
| 27 |                                                           |                   | any procedures for monitoring adherence (eg, drug tablet return,      |
| 28 |                                                           |                   | laboratory tests)                                                     |
| 29 |                                                           |                   |                                                                       |
| 30 |                                                           |                   |                                                                       |
| 31 |                                                           | n/a               | Relevant concomitant care and interventions that are permitted or     |
| 32 |                                                           |                   | prohibited during the trial                                           |
| 33 |                                                           |                   |                                                                       |
| 34 | Outcomes                                                  | 11-12,<br>table 2 | Primary, secondary, and other outcomes, including the specific        |
| 35 |                                                           |                   | measurement variable (eg, systolic blood pressure), analysis          |
| 36 |                                                           |                   | metric (eg, change from baseline, final value, time to event),        |
| 37 |                                                           |                   | method of aggregation (eg, median, proportion), and time point        |
| 38 |                                                           |                   | for each outcome. Explanation of the clinical relevance of chosen     |
| 39 |                                                           |                   | efficacy and harm outcomes is strongly recommended                    |
| 40 |                                                           |                   |                                                                       |
| 41 |                                                           |                   |                                                                       |
| 42 | Participant                                               | 8                 | Time schedule of enrolment, interventions (including any run-ins      |
| 43 | timeline                                                  |                   | and washouts), assessments, and visits for participants. A            |
| 44 |                                                           |                   | schematic diagram is highly recommended (see Figure)                  |
| 45 |                                                           |                   |                                                                       |
| 46 | Sample size                                               | 12                | Estimated number of participants needed to achieve study              |
| 47 |                                                           |                   | objectives and how it was determined, including clinical and          |
| 48 |                                                           |                   | statistical assumptions supporting any sample size calculations       |
| 49 |                                                           |                   |                                                                       |
| 50 |                                                           |                   |                                                                       |
| 51 | Recruitment                                               | 7                 | Strategies for achieving adequate participant enrolment to reach      |
| 52 |                                                           |                   | target sample size                                                    |
| 53 |                                                           |                   |                                                                       |

#### Methods: Assignment of interventions (for controlled trials)

Allocation:

|    |                |     |                                                                                                                                                                                                                                                                                                                                                          |
|----|----------------|-----|----------------------------------------------------------------------------------------------------------------------------------------------------------------------------------------------------------------------------------------------------------------------------------------------------------------------------------------------------------|
| 1  |                |     |                                                                                                                                                                                                                                                                                                                                                          |
| 2  | Sequence       | n/a | Method of generating the allocation sequence (eg, computer-generated random numbers), and list of any factors for stratification. To reduce predictability of a random sequence, details of any planned restriction (eg, blocking) should be provided in a separate document that is unavailable to those who enrol participants or assign interventions |
| 3  | generation     |     |                                                                                                                                                                                                                                                                                                                                                          |
| 4  |                |     |                                                                                                                                                                                                                                                                                                                                                          |
| 5  |                |     |                                                                                                                                                                                                                                                                                                                                                          |
| 6  |                |     |                                                                                                                                                                                                                                                                                                                                                          |
| 7  |                |     |                                                                                                                                                                                                                                                                                                                                                          |
| 8  |                |     |                                                                                                                                                                                                                                                                                                                                                          |
| 9  |                |     |                                                                                                                                                                                                                                                                                                                                                          |
| 10 | Allocation     | 8   |                                                                                                                                                                                                                                                                                                                                                          |
| 11 | concealment    |     |                                                                                                                                                                                                                                                                                                                                                          |
| 12 | mechanism      |     |                                                                                                                                                                                                                                                                                                                                                          |
| 13 |                |     |                                                                                                                                                                                                                                                                                                                                                          |
| 14 |                |     |                                                                                                                                                                                                                                                                                                                                                          |
| 15 | Implementation | n/a | Who will generate the allocation sequence, who will enrol participants, and who will assign participants to interventions                                                                                                                                                                                                                                |
| 16 |                |     |                                                                                                                                                                                                                                                                                                                                                          |
| 17 |                |     |                                                                                                                                                                                                                                                                                                                                                          |
| 18 |                |     |                                                                                                                                                                                                                                                                                                                                                          |
| 19 | Blinding       | n/a | Who will be blinded after assignment to interventions (eg, trial participants, care providers, outcome assessors, data analysts), and how                                                                                                                                                                                                                |
| 20 | (masking)      |     |                                                                                                                                                                                                                                                                                                                                                          |
| 21 |                |     |                                                                                                                                                                                                                                                                                                                                                          |
| 22 |                |     |                                                                                                                                                                                                                                                                                                                                                          |
| 23 |                | n/a | If blinded, circumstances under which unblinding is permissible, and procedure for revealing a participant's allocated intervention during the trial                                                                                                                                                                                                     |
| 24 |                |     |                                                                                                                                                                                                                                                                                                                                                          |
| 25 |                |     |                                                                                                                                                                                                                                                                                                                                                          |
| 26 |                |     |                                                                                                                                                                                                                                                                                                                                                          |

### Methods: Data collection, management, and analysis

|    |                 |       |                                                                                                                                                                                                                                                                                                                                                                                                              |
|----|-----------------|-------|--------------------------------------------------------------------------------------------------------------------------------------------------------------------------------------------------------------------------------------------------------------------------------------------------------------------------------------------------------------------------------------------------------------|
| 27 |                 |       |                                                                                                                                                                                                                                                                                                                                                                                                              |
| 28 |                 |       |                                                                                                                                                                                                                                                                                                                                                                                                              |
| 29 |                 |       |                                                                                                                                                                                                                                                                                                                                                                                                              |
| 30 | Data collection | 11-12 | Plans for assessment and collection of outcome, baseline, and other trial data, including any related processes to promote data quality (eg, duplicate measurements, training of assessors) and a description of study instruments (eg, questionnaires, laboratory tests) along with their reliability and validity, if known. Reference to where data collection forms can be found, if not in the protocol |
| 31 | methods         |       |                                                                                                                                                                                                                                                                                                                                                                                                              |
| 32 |                 | n/a   |                                                                                                                                                                                                                                                                                                                                                                                                              |
| 33 |                 |       | Plans to promote participant retention and complete follow-up, including list of any outcome data to be collected for participants who discontinue or deviate from intervention protocols                                                                                                                                                                                                                    |
| 34 |                 |       |                                                                                                                                                                                                                                                                                                                                                                                                              |
| 35 |                 |       |                                                                                                                                                                                                                                                                                                                                                                                                              |
| 36 |                 |       |                                                                                                                                                                                                                                                                                                                                                                                                              |
| 37 |                 |       |                                                                                                                                                                                                                                                                                                                                                                                                              |
| 38 |                 |       |                                                                                                                                                                                                                                                                                                                                                                                                              |
| 39 |                 |       |                                                                                                                                                                                                                                                                                                                                                                                                              |
| 40 |                 |       |                                                                                                                                                                                                                                                                                                                                                                                                              |
| 41 |                 |       |                                                                                                                                                                                                                                                                                                                                                                                                              |
| 42 | Data            | n/a   | Plans for data entry, coding, security, and storage, including any related processes to promote data quality (eg, double data entry; range checks for data values). Reference to where details of data management procedures can be found, if not in the protocol                                                                                                                                            |
| 43 | management      |       |                                                                                                                                                                                                                                                                                                                                                                                                              |
| 44 |                 |       |                                                                                                                                                                                                                                                                                                                                                                                                              |
| 45 |                 |       |                                                                                                                                                                                                                                                                                                                                                                                                              |
| 46 |                 |       |                                                                                                                                                                                                                                                                                                                                                                                                              |
| 47 |                 |       |                                                                                                                                                                                                                                                                                                                                                                                                              |
| 48 | Statistical     | 12-13 | Statistical methods for analysing primary and secondary outcomes. Reference to where other details of the statistical analysis plan can be found, if not in the protocol                                                                                                                                                                                                                                     |
| 49 | methods         |       |                                                                                                                                                                                                                                                                                                                                                                                                              |
| 50 |                 |       |                                                                                                                                                                                                                                                                                                                                                                                                              |
| 51 |                 |       |                                                                                                                                                                                                                                                                                                                                                                                                              |
| 52 |                 | n/a   | Methods for any additional analyses (eg, subgroup and adjusted analyses)                                                                                                                                                                                                                                                                                                                                     |
| 53 |                 |       |                                                                                                                                                                                                                                                                                                                                                                                                              |
| 54 |                 |       |                                                                                                                                                                                                                                                                                                                                                                                                              |
| 55 |                 |       |                                                                                                                                                                                                                                                                                                                                                                                                              |
| 56 |                 | 12    | Definition of analysis population relating to protocol non-adherence (eg, as randomised analysis), and any statistical methods to handle missing data (eg, multiple imputation)                                                                                                                                                                                                                              |
| 57 |                 |       |                                                                                                                                                                                                                                                                                                                                                                                                              |
| 58 |                 |       |                                                                                                                                                                                                                                                                                                                                                                                                              |
| 59 |                 |       |                                                                                                                                                                                                                                                                                                                                                                                                              |
| 60 |                 |       |                                                                                                                                                                                                                                                                                                                                                                                                              |

## Methods: Monitoring

|                 |     |                                                                                                                                                                                                                                                                                                                                       |
|-----------------|-----|---------------------------------------------------------------------------------------------------------------------------------------------------------------------------------------------------------------------------------------------------------------------------------------------------------------------------------------|
| Data monitoring | n/a | Composition of data monitoring committee (DMC); summary of its role and reporting structure; statement of whether it is independent from the sponsor and competing interests; and reference to where further details about its charter can be found, if not in the protocol. Alternatively, an explanation of why a DMC is not needed |
|                 | n/a | Description of any interim analyses and stopping guidelines, including who will have access to these interim results and make the final decision to terminate the trial                                                                                                                                                               |
| Harms           | n/a | Plans for collecting, assessing, reporting, and managing solicited and spontaneously reported adverse events and other unintended effects of trial interventions or trial conduct                                                                                                                                                     |
| Auditing        | n/a | Frequency and procedures for auditing trial conduct, if any, and whether the process will be independent from investigators and the sponsor                                                                                                                                                                                           |

## Ethics and dissemination

|                               |     |                                                                                                                                                                                                                                  |
|-------------------------------|-----|----------------------------------------------------------------------------------------------------------------------------------------------------------------------------------------------------------------------------------|
| Research ethics approval      | 2   | Plans for seeking research ethics committee/institutional review board (REC/IRB) approval                                                                                                                                        |
| Protocol amendments           | 2   | Plans for communicating important protocol modifications (eg, changes to eligibility criteria, outcomes, analyses) to relevant parties (eg, investigators, REC/IRBs, trial participants, trial registries, journals, regulators) |
| Consent or assent             | 6   | Who will obtain informed consent or assent from potential trial participants or authorised surrogates, and how (see Item 32)                                                                                                     |
|                               | n/a | Additional consent provisions for collection and use of participant data and biological specimens in ancillary studies, if applicable                                                                                            |
| Confidentiality               | 8   | How personal information about potential and enrolled participants will be collected, shared, and maintained in order to protect confidentiality before, during, and after the trial                                             |
| Declaration of interests      | 16  | Financial and other competing interests for principal investigators for the overall trial and each study site                                                                                                                    |
| Access to data                | 16  | Statement of who will have access to the final trial dataset, and disclosure of contractual agreements that limit such access for investigators                                                                                  |
| Ancillary and post-trial care | n/a | Provisions, if any, for ancillary and post-trial care, and for compensation to those who suffer harm from trial participation                                                                                                    |



|    |               |     |                                                                  |
|----|---------------|-----|------------------------------------------------------------------|
| 1  |               |     |                                                                  |
| 2  | Dissemination | 2   | Plans for investigators and sponsor to communicate trial results |
| 3  | policy        |     | to participants, healthcare professionals, the public, and other |
| 4  |               |     | relevant groups (eg, via publication, reporting in results       |
| 5  |               |     | databases, or other data sharing arrangements), including any    |
| 6  |               |     | publication restrictions                                         |
| 7  |               |     |                                                                  |
| 8  |               |     |                                                                  |
| 9  |               | n/a | Authorship eligibility guidelines and any intended use of        |
| 10 |               |     | professional writers                                             |
| 11 |               |     |                                                                  |
| 12 |               | 15  | Plans, if any, for granting public access to the full protocol,  |
| 13 |               |     | participant-level dataset, and statistical code                  |
| 14 |               |     |                                                                  |

## Appendices

|    |                  |     |                                                                      |
|----|------------------|-----|----------------------------------------------------------------------|
| 17 | Informed consent | n/a | Model consent form and other related documentation given to          |
| 18 | materials        |     | participants and authorised surrogates                               |
| 19 |                  |     |                                                                      |
| 20 | Biological       | n/a | Plans for collection, laboratory evaluation, and storage of          |
| 21 | specimens        |     | biological specimens for genetic or molecular analysis in the        |
| 22 |                  |     | current trial and for future use in ancillary studies, if applicable |
| 23 |                  |     |                                                                      |
| 24 |                  |     |                                                                      |

---
